# Supplementary material for: Mechanistic study on the NHC-catalyzed [3+4] annulation of enals and thiazolones
Source: Royal Society of Chemistry journal article supplement (doi:10.1039/d1nj01617b), 2021-01-01
Supplement: d1nj01617b2.pdf [file d1nj01617b2.pdf]

**New Journal of Chemistry**

*Supporting Information*

**Mechanistic Study on the NHC-catalyzed [3+4] Annulation of Enals and  
Thiazolones**

**Yan Li\*, Zhilin Li, Zhiqiang Zhang**

*School of Chemical Engineering, University of Science and Technology Liaoning,  
Anshan 114051, P. R. China*

***Corresponding person: Yan Li***

***E-mail: yanli@ustl.edu.cn***

***Telephone: 86-412-5929627***

***Fax: 86-412-5929627***

## Contents

|                                                                                                                                                                                                                                                   |    |
|---------------------------------------------------------------------------------------------------------------------------------------------------------------------------------------------------------------------------------------------------|----|
| <b>Table S1</b> Comparison of the free energies of the stereoselective transition states calculated with M06-2X, $\omega$ B97X-D and B3LYP-D3 methods in Conjunction with 6-311++G(2df,2pd) basis set using IEF-PCM and SMD salvation models..... | S3 |
| <b>Fig. S1</b> Free energy (kcal/mol) profiles of Step I.....                                                                                                                                                                                     | S4 |
| <b>Fig. S2</b> Free energy (kcal/mol) profiles of Step II.....                                                                                                                                                                                    | S5 |
| <b>Fig. S3</b> Free energy (kcal/mol) profiles of the unfavored reaction pathways.....                                                                                                                                                            | S6 |
| <b>Fig. S4</b> Optimized structures of stereoselective transition states.....                                                                                                                                                                     | S7 |
| <b>Coordinates</b> .....                                                                                                                                                                                                                          | S8 |

Table S1. Comparison of the free energies of the stereoselective transition states calculated with M06-2X,  $\omega$ B97X-D and B3LYP-D3 methods in conjunction with 6-311++G(2df,2pd) basis set using IEF-PCM and SMD solvation models.

| species        | M06  |        | $\omega$ B97XD |        | B3LYP-D3 |        |
|----------------|------|--------|----------------|--------|----------|--------|
|                | SMD  | IEFPCM | SMD            | IEFPCM | SMD      | IEFPCM |
| <b>TS3(RR)</b> | 17.5 | 17.4   | 17.9           | 18.7   | 15.0     | 15.9   |
| <b>TS3(RS)</b> | 0.0  | 0.0    | 0.0            | 0.0    | 0.0      | 0.0    |
| <b>TS3(SR)</b> | 5.5  | 5.5    | 5.6            | 6.9    | 8.9      | 9.6    |
| <b>TS3(SS)</b> | 11.0 | 10.9   | 12.4           | 13.1   | 13.8     | 10.1   |



**Fig. S2** Free energy (kcal/mol) profiles of Step II.

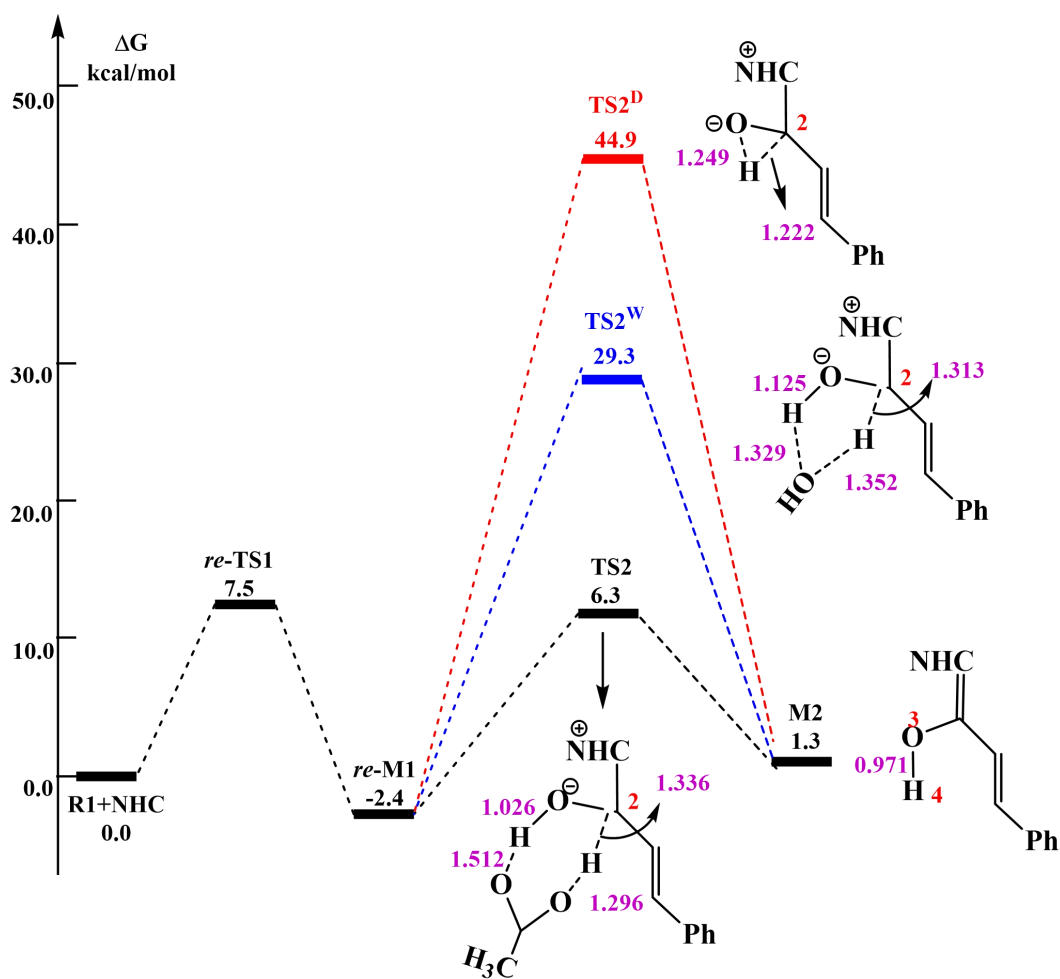

**Fig. S3** Free energy (kcal/mol) profiles of the unfavored reaction pathways.

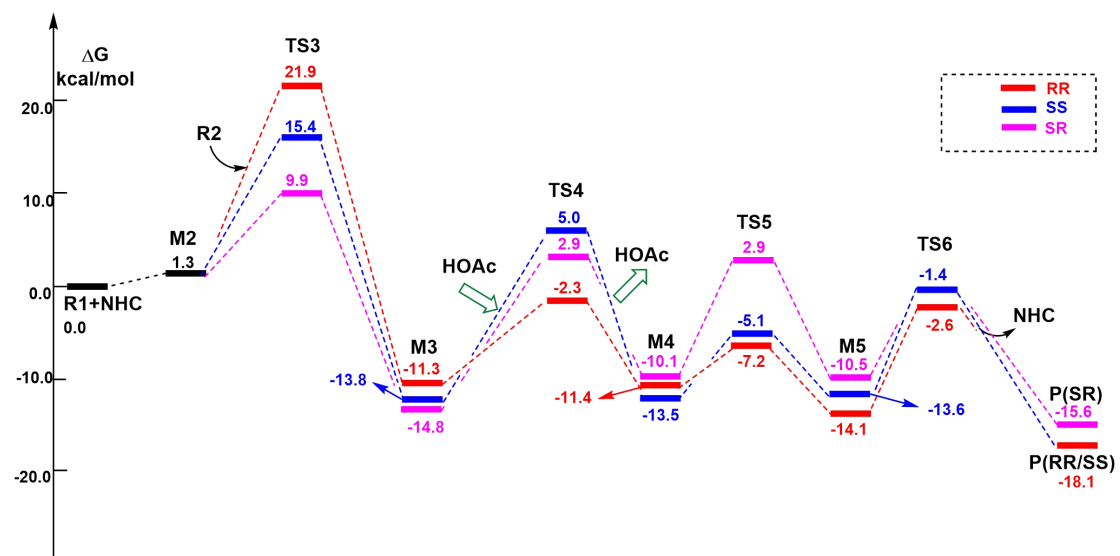

**Fig. S4** Optimized structures of stereoselective transition states in gas phase and in 1,4-dioxane (italic). Distances are given in Å.

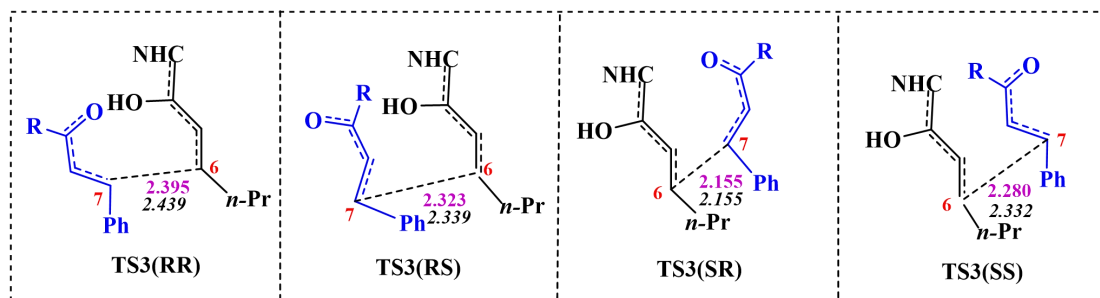

## Cartesian Coordinates

### NHC

|   |             |             |             |
|---|-------------|-------------|-------------|
| O | 0.68055500  | -1.89864400 | 1.17431500  |
| N | -2.88201500 | -2.08726500 | -0.97295800 |
| N | -2.73106300 | -1.57853900 | -2.25547100 |
| N | -0.83656500 | -2.00158300 | -1.24951200 |
| C | -4.83082600 | -3.47925000 | -0.63612300 |
| H | -4.29391800 | -4.26526400 | -1.15661000 |
| C | -6.11644700 | -3.67980000 | -0.15038500 |
| H | -6.60771400 | -4.63687600 | -0.28787900 |
| C | -6.75988300 | -2.64039500 | 0.51423200  |
| H | -7.76413900 | -2.78104100 | 0.90096000  |
| C | -6.12031600 | -1.41794300 | 0.69330800  |
| H | -6.64105700 | -0.62493600 | 1.21947800  |
| C | -4.82580400 | -1.18869700 | 0.21751400  |
| C | -4.20710500 | -2.25056100 | -0.45210600 |
| C | -1.74475500 | -2.34991100 | -0.29474800 |
| C | -1.44148400 | -1.53184400 | -2.37790100 |
| C | -0.43527800 | -1.05449900 | -3.37621500 |
| H | -0.63623100 | -0.01839600 | -3.66082900 |
| H | -0.46222400 | -1.65402900 | -4.28833700 |
| C | 0.91834400  | -1.23336700 | -2.61201400 |
| H | 1.48444900  | -0.30163500 | -2.55392200 |
| H | 1.55640600  | -1.94187800 | -3.14132000 |
| C | 0.59943100  | -1.80408800 | -1.19520400 |
| H | 1.10204400  | -2.76489400 | -1.05162600 |
| C | 0.93499500  | -1.01017600 | 0.10874700  |
| C | 2.43008100  | -0.70831000 | 0.12760000  |
| C | 2.95609200  | 0.47666300  | -0.38381500 |
| C | 3.30332500  | -1.67867500 | 0.62282100  |
| C | 4.33367800  | 0.67780800  | -0.41171000 |
| H | 2.30149100  | 1.26605600  | -0.74227800 |
| C | 4.67592300  | -1.45988700 | 0.59762100  |
| H | 2.89968800  | -2.59474800 | 1.03934400  |
| C | 5.20682200  | -0.28496000 | 0.07664600  |
| C | 0.09020500  | 0.25641100  | 0.29599500  |
| C | -0.32727300 | 1.06724700  | -0.75816000 |
| C | -0.29211600 | 0.61200600  | 1.59103700  |
| C | -1.10336600 | 2.19831400  | -0.52651200 |
| H | -0.06563600 | 0.83663900  | -1.78259300 |
| C | -1.06272500 | 1.74825200  | 1.81303300  |
| H | 0.00353600  | -0.02018800 | 2.42162900  |
| C | -1.47520200 | 2.55832100  | 0.76057900  |
| H | 6.27829700  | -0.12131700 | 0.05798200  |



|   |             |             |             |
|---|-------------|-------------|-------------|
| H | -2.08671000 | 3.43549200  | 0.93999400  |
| H | -0.25058500 | -2.20590700 | 1.08163600  |
| C | 5.59340100  | -2.49015300 | 1.19738000  |
| C | 4.86810300  | 1.94069300  | -1.02849700 |
| C | -1.44140900 | 2.08861500  | 3.22898700  |
| C | -1.49943900 | 3.03027100  | -1.71323600 |
| F | -2.48327900 | 3.88843400  | -1.42023100 |
| F | -1.91869600 | 2.25345300  | -2.72696000 |
| F | -0.46543000 | 3.74539400  | -2.17802700 |
| F | -1.97128300 | 1.03016500  | 3.85681000  |
| F | -2.33901800 | 3.08351100  | 3.27851000  |
| F | -0.37449400 | 2.47316200  | 3.94145400  |
| F | 5.12694500  | -3.73152600 | 1.00654200  |
| F | 6.82104100  | -2.42822100 | 0.66347700  |
| F | 5.72549600  | -2.31682900 | 2.51896400  |
| F | 4.89462800  | 1.85236600  | -2.36771200 |
| F | 6.11503800  | 2.20520000  | -0.62212800 |
| F | 4.10134500  | 2.99638200  | -0.72323000 |
| C | -4.14719000 | 0.16193200  | 0.37329400  |
| C | -4.52409400 | 0.86286200  | 1.67985400  |
| C | -4.48336900 | 1.04989900  | -0.83380700 |
| H | -3.06074300 | -0.00478000 | 0.38363600  |
| H | -4.32178900 | 0.23324000  | 2.55030200  |
| H | -3.95164300 | 1.78760200  | 1.78799500  |
| H | -5.58125700 | 1.14567000  | 1.69320300  |
| H | -4.12747100 | 0.60357200  | -1.76607600 |
| H | -5.56779900 | 1.18543000  | -0.90844000 |
| H | -4.02849700 | 2.03897500  | -0.72167800 |

## R1

|   |             |             |             |
|---|-------------|-------------|-------------|
| C | 0.37519100  | 0.00565900  | 0.34743800  |
| C | 1.35679300  | 0.77152800  | -0.13828400 |
| H | 0.63920800  | -1.01099300 | 0.64299700  |
| C | 2.73720000  | 0.24713700  | -0.25365000 |
| H | 1.17429400  | 1.79474600  | -0.45925500 |
| C | -1.05438100 | 0.41603900  | 0.49296700  |
| C | -1.99716200 | -0.47727500 | -0.32522400 |
| H | -1.17900100 | 1.46318800  | 0.19340500  |
| H | -1.34105400 | 0.34819300  | 1.55161600  |
| C | -3.45945300 | -0.08156800 | -0.14545400 |
| H | -1.71683900 | -0.41603900 | -1.38258100 |
| H | -1.85232100 | -1.52199500 | -0.02579100 |
| H | -4.11979600 | -0.71939000 | -0.73775900 |
| H | -3.76099400 | -0.16557800 | 0.90322500  |

|   |             |             |             |
|---|-------------|-------------|-------------|
| H | -3.62484600 | 0.95440600  | -0.45699000 |
| H | 3.48437900  | 0.95368200  | -0.66873800 |
| O | 3.06848100  | -0.87116700 | 0.07164000  |

**R2**

|   |             |             |             |
|---|-------------|-------------|-------------|
| C | -1.64980600 | 0.51670400  | -0.01536600 |
| C | 0.78344000  | 0.96279600  | -0.07003400 |
| C | -0.13513900 | 2.16177900  | -0.07467500 |
| N | -1.49730300 | 1.78735700  | -0.04167300 |
| O | 0.25012700  | 3.30312900  | -0.09988700 |
| S | -0.17541000 | -0.50310900 | -0.03014500 |
| C | 2.11438000  | 1.13725000  | -0.05737000 |
| H | 2.40768200  | 2.18724500  | -0.04180900 |
| C | -2.96872000 | -0.13456100 | 0.02213000  |
| C | -4.11272700 | 0.67276000  | 0.00249500  |
| C | -3.09959700 | -1.52504200 | 0.07816700  |
| C | -5.37134800 | 0.08893200  | 0.03784200  |
| H | -3.98673100 | 1.74904700  | -0.04094000 |
| C | -4.36215400 | -2.10415700 | 0.11439000  |
| H | -2.21893200 | -2.16081200 | 0.09542300  |
| C | -5.49784100 | -1.29853200 | 0.09398900  |
| H | -6.25672500 | 0.71565300  | 0.02239800  |
| H | -4.45980200 | -3.18350100 | 0.15945700  |
| H | -6.48325500 | -1.75250700 | 0.12283700  |
| C | 3.20115900  | 0.16068500  | -0.03473800 |
| C | 3.03050700  | -1.20240900 | -0.31951100 |
| C | 4.48835300  | 0.62156600  | 0.28148300  |
| C | 4.11082500  | -2.07420000 | -0.26874000 |
| H | 2.05885200  | -1.58442700 | -0.61226600 |
| C | 5.56597800  | -0.25211400 | 0.33903600  |
| H | 4.63268400  | 1.67775500  | 0.49084600  |
| C | 5.37908000  | -1.60513600 | 0.06637900  |
| H | 3.96322800  | -3.12462400 | -0.49722600 |
| H | 6.55211700  | 0.12216300  | 0.59345500  |
| H | 6.21920300  | -2.29070100 | 0.10808300  |

**H<sub>2</sub>O**

|   |            |             |             |
|---|------------|-------------|-------------|
| O | 0.00000000 | 0.00000000  | 0.11778200  |
| H | 0.00000000 | 0.76046300  | -0.47112900 |
| H | 0.00000000 | -0.76046300 | -0.47112900 |

**HOAc**

|   |             |             |             |
|---|-------------|-------------|-------------|
| H | -1.71727300 | -0.79993000 | 0.00003800  |
| C | -0.09227300 | 0.12421400  | -0.00000800 |

|   |             |             |             |
|---|-------------|-------------|-------------|
| O | -0.77763900 | -1.03785100 | 0.00006500  |
| O | -0.63907000 | 1.19675400  | -0.00008600 |
| C | 1.39241500  | -0.11217200 | 0.00001800  |
| H | 1.67033800  | -0.69422500 | -0.88124000 |
| H | 1.90943300  | 0.84484600  | -0.00000900 |
| H | 1.67032200  | -0.69417200 | 0.88131500  |

**re-TS1**

|   |             |             |             |
|---|-------------|-------------|-------------|
| O | 1.23861900  | -1.58180100 | 3.42992300  |
| N | -2.82707400 | -2.42367800 | 0.87916500  |
| N | -2.70156100 | -3.72457200 | 0.43959300  |
| N | -0.95643700 | -3.02650400 | 1.59267800  |
| C | -4.95928700 | -1.50343200 | 1.55174400  |
| H | -4.77930600 | -1.92968100 | 2.53363400  |
| C | -6.10563400 | -0.76488700 | 1.28186100  |
| H | -6.84498200 | -0.60386100 | 2.05849100  |
| C | -6.29014200 | -0.23885000 | 0.00691300  |
| H | -7.18044600 | 0.33941000  | -0.21798700 |
| C | -5.33420500 | -0.44166000 | -0.98506200 |
| H | -5.49053400 | -0.00839700 | -1.96772100 |
| C | -4.16706500 | -1.16907900 | -0.74016200 |
| C | -4.01675000 | -1.69493800 | 0.54815300  |
| C | -1.78334100 | -1.94964600 | 1.58395000  |
| C | -1.54041600 | -4.05970600 | 0.90203100  |
| C | -0.68764500 | -5.28359000 | 0.91314800  |
| H | -0.64401700 | -5.77277400 | -0.06049800 |
| H | -1.08327500 | -6.00221600 | 1.63754800  |
| C | 0.67028300  | -4.70141700 | 1.36887700  |
| H | 1.24672700  | -5.39849000 | 1.97782400  |
| H | 1.28220800  | -4.46107700 | 0.49581700  |
| C | 0.34289700  | -3.41570000 | 2.17434900  |
| H | 0.16906000  | -3.67607700 | 3.22394600  |
| C | 1.42948400  | -2.29768600 | 2.25118400  |
| C | 2.77775600  | -3.02004000 | 2.41304200  |
| C | 3.59575900  | -3.35384200 | 1.33396100  |
| C | 3.16793200  | -3.40017700 | 3.69724600  |
| C | 4.77131100  | -4.06992900 | 1.53917000  |
| H | 3.33058500  | -3.05209400 | 0.32475800  |
| C | 4.34192300  | -4.12218800 | 3.88725500  |
| H | 2.55646500  | -3.10725800 | 4.54390300  |
| C | 5.15468800  | -4.46728200 | 2.81448700  |
| C | 1.47133700  | -1.36930100 | 1.03149500  |
| C | 1.04202500  | -1.72888700 | -0.24618700 |
| C | 2.03228400  | -0.10379700 | 1.21479000  |

|   |              |              |              |
|---|--------------|--------------|--------------|
| C | 1. 19947500  | -0. 85103200 | -1. 31683800 |
| H | 0. 57200700  | -2. 68701400 | -0. 43725600 |
| C | 2. 18415700  | 0. 76244400  | 0. 13912400  |
| H | 2. 33703100  | 0. 19447000  | 2. 21273900  |
| C | 1. 78315000  | 0. 39541200  | -1. 13987300 |
| H | 6. 07013900  | -5. 02663400 | 2. 96941800  |
| H | 1. 90747700  | 1. 07432200  | -1. 97592100 |
| H | 0. 48127300  | -0. 91407600 | 3. 31339200  |
| C | 4. 69379100  | -4. 56870100 | 5. 27929800  |
| C | 5. 66198300  | -4. 36437300 | 0. 36448000  |
| C | 2. 74516600  | 2. 13534200  | 0. 38483500  |
| C | 0. 80113700  | -1. 28105500 | -2. 69854200 |
| F | 1. 82540400  | -1. 82705500 | -3. 36699300 |
| F | 0. 36485000  | -0. 24429500 | -3. 43283300 |
| F | -0. 18220400 | -2. 19850900 | -2. 67326800 |
| F | 3. 82550900  | 2. 09446800  | 1. 17255600  |
| F | 1. 84722000  | 2. 92874900  | 0. 99376300  |
| F | 3. 09082000  | 2. 74321100  | -0. 75930800 |
| F | 4. 49989500  | -3. 59054900 | 6. 17250000  |
| F | 3. 92848000  | -5. 60378700 | 5. 66217500  |
| F | 5. 97047000  | -4. 96183500 | 5. 37171400  |
| F | 6. 43083700  | -5. 43918500 | 0. 58370600  |
| F | 6. 48062500  | -3. 33792900 | 0. 09703400  |
| F | 4. 94590000  | -4. 59447400 | -0. 74678900 |
| C | -3. 10481600 | -1. 36663800 | -1. 80375600 |
| C | -2. 95278400 | -0. 14825600 | -2. 71639100 |
| C | -3. 40004000 | -2. 62454000 | -2. 63268300 |
| H | -2. 14774600 | -1. 51108800 | -1. 28675300 |
| H | -2. 83863900 | 0. 77182500  | -2. 13551500 |
| H | -2. 06812600 | -0. 26770200 | -3. 34636300 |
| H | -3. 81531800 | -0. 03264300 | -3. 38088300 |
| H | -3. 46451000 | -3. 51055500 | -1. 99754300 |
| H | -4. 35212000 | -2. 50817600 | -3. 16170900 |
| H | -2. 61132800 | -2. 77666300 | -3. 37470100 |
| C | -1. 29087200 | 1. 71624300  | 0. 75306700  |
| C | -2. 08825100 | 0. 78101100  | 1. 26897900  |
| H | -0. 28819900 | 1. 81176200  | 1. 16753400  |
| C | -1. 63520700 | -0. 05016700 | 2. 42878200  |
| H | -3. 11510100 | 0. 66949600  | 0. 92816800  |
| C | -1. 68666800 | 2. 67104900  | -0. 33133600 |
| C | -0. 73111900 | 2. 63701600  | -1. 52880900 |
| H | -1. 69389300 | 3. 69304200  | 0. 07313500  |
| H | -2. 71292800 | 2. 45937900  | -0. 66046300 |
| C | -1. 18318000 | 3. 56166000  | -2. 65435200 |

|   |             |             |             |
|---|-------------|-------------|-------------|
| H | 0.27188400  | 2.92159300  | -1.18589500 |
| H | -0.65322200 | 1.60876100  | -1.90235900 |
| H | -0.48351100 | 3.54456600  | -3.49379900 |
| H | -2.16612400 | 3.25932700  | -3.03117500 |
| H | -1.26478500 | 4.59516100  | -2.30337900 |
| H | -2.45585000 | -0.33592100 | 3.11188200  |
| O | -0.48007500 | 0.12542700  | 2.88758000  |

**si-TS1**

|   |             |             |             |
|---|-------------|-------------|-------------|
| O | -1.05953700 | 1.30728000  | 1.16895500  |
| N | 2.85031300  | 1.09343700  | -1.62488800 |
| N | 2.40410400  | 0.85313700  | -2.91213500 |
| N | 0.77604500  | 1.11430200  | -1.45461700 |
| C | 4.97051900  | 2.15401100  | -2.05540500 |
| H | 4.45021500  | 2.75908700  | -2.79064300 |
| C | 6.32170300  | 2.32883400  | -1.79834000 |
| H | 6.88478400  | 3.08285700  | -2.33741400 |
| C | 6.93901800  | 1.53762800  | -0.83153100 |
| H | 7.99217400  | 1.67382400  | -0.60817000 |
| C | 6.21173600  | 0.56415600  | -0.15919900 |
| H | 6.71107300  | -0.05934200 | 0.57711900  |
| C | 4.85229700  | 0.34196900  | -0.41478100 |
| C | 4.25251300  | 1.18349000  | -1.35840300 |
| C | 1.88935000  | 1.26608100  | -0.69960700 |
| C | 1.11714100  | 0.87120400  | -2.75892800 |
| C | -0.09923700 | 0.72192000  | -3.61167100 |
| H | -0.02358900 | -0.11480800 | -4.30724800 |
| H | -0.25659600 | 1.63311400  | -4.19650100 |
| C | -1.21051500 | 0.52555500  | -2.54581500 |
| H | -1.44058700 | -0.53693100 | -2.44033700 |
| H | -2.14407800 | 1.01749700  | -2.82152000 |
| C | -0.66463000 | 1.09804600  | -1.20371800 |
| H | -1.00388800 | 2.13007500  | -1.05849900 |
| C | -1.07925100 | 0.37404600  | 0.12903300  |
| C | -2.55198100 | -0.02974800 | -0.02748400 |
| C | -2.96039000 | -1.30465200 | -0.40664200 |
| C | -3.52212800 | 0.95635100  | 0.17617400  |
| C | -4.31392200 | -1.58259200 | -0.59474100 |
| H | -2.23436900 | -2.10081100 | -0.54592100 |
| C | -4.86629600 | 0.66686100  | -0.01747100 |
| H | -3.21383200 | 1.94425000  | 0.50003700  |
| C | -5.27848600 | -0.60426900 | -0.40851900 |
| C | -0.19718200 | -0.83376900 | 0.46152900  |
| C | 0.36505800  | -1.66166000 | -0.50699300 |

|   |             |             |             |
|---|-------------|-------------|-------------|
| C | 0.04703500  | -1.12516300 | 1.80788400  |
| C | 1.15607600  | -2.75020400 | -0.14209100 |
| H | 0.22844500  | -1.46653400 | -1.56598600 |
| C | 0.82462700  | -2.21976900 | 2.15897100  |
| H | -0.35849800 | -0.47714600 | 2.57595400  |
| C | 1.39021700  | -3.04604900 | 1.19060000  |
| H | -6.32849800 | -0.82511800 | -0.56165700 |
| H | 2.01390000  | -3.88782200 | 1.47180400  |
| H | -0.13267400 | 1.47164500  | 1.51714400  |
| C | -5.89546000 | 1.73070500  | 0.24840200  |
| C | -4.70028600 | -2.96445800 | -1.04276300 |
| C | 1.05034100  | -2.55304000 | 3.60828600  |
| C | 1.78330900  | -3.55209900 | -1.24532500 |
| F | 2.58051000  | -4.52028400 | -0.77978100 |
| F | 2.52043500  | -2.76235900 | -2.04560800 |
| F | 0.85542200  | -4.12765400 | -2.02440300 |
| F | 0.83886000  | -1.50395900 | 4.40533400  |
| F | 2.30724500  | -2.98163100 | 3.81548200  |
| F | 0.23556100  | -3.53948300 | 4.01227500  |
| F | -5.42018300 | 2.95283100  | -0.03053900 |
| F | -6.99776000 | 1.54394900  | -0.49095500 |
| F | -6.27710700 | 1.73909500  | 1.53226800  |
| F | -4.31705100 | -3.18583300 | -2.31051800 |
| F | -6.02257400 | -3.16064900 | -0.98245900 |
| F | -4.10988000 | -3.90276500 | -0.29053100 |
| C | 4.13344000  | -0.81098300 | 0.26767500  |
| C | 3.98139600  | -0.59147800 | 1.77903100  |
| C | 4.86379800  | -2.13028300 | -0.01663000 |
| H | 3.13264000  | -0.89205800 | -0.16529700 |
| H | 3.23333700  | 0.17200700  | 2.01179500  |
| H | 3.66113700  | -1.52026400 | 2.26035000  |
| H | 4.93704800  | -0.30109600 | 2.22904700  |
| H | 5.01456400  | -2.28179500 | -1.08824800 |
| H | 5.84027600  | -2.15959900 | 0.47744600  |
| H | 4.27613000  | -2.97011000 | 0.36690300  |
| C | 0.36179400  | 4.17077000  | 0.99399500  |
| C | 1.49434300  | 3.57781600  | 0.61032900  |
| H | -0.20920900 | 3.70934500  | 1.79969700  |
| C | 1.99205900  | 2.33326200  | 1.26160900  |
| H | 2.12399400  | 4.00460300  | -0.16954300 |
| C | -0.17449400 | 5.44866200  | 0.42659500  |
| C | -0.30897100 | 6.54658200  | 1.48930500  |
| H | -1.16729600 | 5.26301900  | -0.00794500 |
| H | 0.47009500  | 5.79842300  | -0.38903200 |

|   |             |            |            |
|---|-------------|------------|------------|
| C | -0.88179700 | 7.83763300 | 0.91255900 |
| H | -0.94929200 | 6.18256300 | 2.30140600 |
| H | 0.67577000  | 6.73437300 | 1.93147800 |
| H | -0.97678900 | 8.61034700 | 1.67920900 |
| H | -0.23829400 | 8.22947600 | 0.11869500 |
| H | -1.87381400 | 7.66729000 | 0.48259700 |
| H | 3.08620700  | 2.20024900 | 1.23077200 |
| O | 1.32309800  | 1.70144100 | 2.09522100 |

**re-M1**

|   |             |             |             |
|---|-------------|-------------|-------------|
| O | 1.35437800  | -1.27542600 | 3.48728600  |
| N | -2.87598000 | -2.22572000 | 1.00014800  |
| N | -2.72052400 | -3.54280700 | 0.66719200  |
| N | -0.95035700 | -2.73928800 | 1.72994300  |
| C | -5.07673400 | -1.41310900 | 1.60068800  |
| H | -4.89439100 | -1.78276000 | 2.60468400  |
| C | -6.26957500 | -0.78349300 | 1.26619800  |
| H | -7.04162500 | -0.64929300 | 2.01530900  |
| C | -6.45872700 | -0.33198700 | -0.03670100 |
| H | -7.38673700 | 0.16013100  | -0.30898200 |
| C | -5.46274900 | -0.49782000 | -0.99530100 |
| H | -5.62602500 | -0.12605900 | -2.00187300 |
| C | -4.24833700 | -1.11506500 | -0.68783500 |
| C | -4.09797900 | -1.56665200 | 0.62673400  |
| C | -1.81677100 | -1.70708100 | 1.64438200  |
| C | -1.54518800 | -3.82436800 | 1.12997500  |
| C | -0.71073000 | -5.05359800 | 1.22618700  |
| H | -0.69177100 | -5.61703300 | 0.29293900  |
| H | -1.11172900 | -5.70408200 | 2.00987300  |
| C | 0.65391100  | -4.45668400 | 1.61747100  |
| H | 1.23623100  | -5.11292400 | 2.26438700  |
| H | 1.25350100  | -4.27979400 | 0.72146800  |
| C | 0.36340900  | -3.11634400 | 2.33840000  |
| H | 0.16871400  | -3.29658500 | 3.40024100  |
| C | 1.50400100  | -2.04263600 | 2.35175000  |
| C | 2.82613700  | -2.81643700 | 2.50322300  |
| C | 3.60297400  | -3.22997200 | 1.42102700  |
| C | 3.24022300  | -3.14406900 | 3.79484200  |
| C | 4.75844800  | -3.97672500 | 1.63163400  |
| H | 3.32967300  | -2.95730800 | 0.40582700  |
| C | 4.39691800  | -3.89121700 | 3.99119000  |
| H | 2.65560600  | -2.79010100 | 4.63695600  |
| C | 5.16582000  | -4.31882000 | 2.91513200  |
| C | 1.54348600  | -1.17592900 | 1.08448700  |

|   |              |              |              |
|---|--------------|--------------|--------------|
| C | 1. 09901300  | -1. 58080200 | -0. 17213300 |
| C | 2. 10775300  | 0. 09493700  | 1. 21493900  |
| C | 1. 23646100  | -0. 73908200 | -1. 27619900 |
| H | 0. 62927100  | -2. 54675300 | -0. 32552200 |
| C | 2. 24399100  | 0. 92097400  | 0. 10873200  |
| H | 2. 41079400  | 0. 42552400  | 2. 20331700  |
| C | 1. 82181000  | 0. 51144800  | -1. 15266700 |
| H | 6. 06951200  | -4. 89697100 | 3. 07347600  |
| H | 1. 92791500  | 1. 16295100  | -2. 01246300 |
| H | 0. 44836100  | -0. 73068100 | 3. 30795200  |
| C | 4. 84973300  | -4. 18771400 | 5. 39415400  |
| C | 5. 54481100  | -4. 47323400 | 0. 45101900  |
| C | 2. 78906300  | 2. 30735100  | 0. 30786200  |
| C | 0. 80441000  | -1. 22558100 | -2. 62767300 |
| F | 1. 77683300  | -1. 89957700 | -3. 25618600 |
| F | 0. 44168500  | -0. 21434100 | -3. 43174600 |
| F | -0. 24759100 | -2. 06462800 | -2. 53962300 |
| F | 3. 88044900  | 2. 30530300  | 1. 08159600  |
| F | 1. 88559300  | 3. 10147100  | 0. 90734300  |
| F | 3. 11118100  | 2. 88981600  | -0. 85675400 |
| F | 3. 80823600  | -4. 39066500 | 6. 21312500  |
| F | 5. 62393700  | -5. 28187800 | 5. 44093000  |
| F | 5. 56259700  | -3. 17597600 | 5. 90568600  |
| F | 5. 10923900  | -5. 67936800 | 0. 04882300  |
| F | 6. 84522200  | -4. 60394500 | 0. 74236500  |
| F | 5. 43812800  | -3. 64903300 | -0. 59921600 |
| C | -3. 14496700 | -1. 27800700 | -1. 71438400 |
| C | -2. 98767100 | -0. 04425300 | -2. 60554800 |
| C | -3. 38518500 | -2. 53848000 | -2. 55580100 |
| H | -2. 19968000 | -1. 40209200 | -1. 17259100 |
| H | -2. 89450900 | 0. 86678500  | -2. 00649100 |
| H | -2. 08613700 | -0. 14619000 | -3. 21503200 |
| H | -3. 83556500 | 0. 07352100  | -3. 28803000 |
| H | -3. 44384900 | -3. 42857000 | -1. 92414000 |
| H | -4. 32588800 | -2. 44807300 | -3. 10939100 |
| H | -2. 57322300 | -2. 66904400 | -3. 27575100 |
| C | -1. 21637200 | 1. 68504200  | 0. 73173000  |
| C | -2. 06429300 | 0. 72953800  | 1. 10158200  |
| H | -0. 23916200 | 1. 70792400  | 1. 21037700  |
| C | -1. 71110300 | -0. 26179900 | 2. 21632400  |
| H | -3. 07287800 | 0. 71183200  | 0. 69349000  |
| C | -1. 55422900 | 2. 76040300  | -0. 25987600 |
| C | -0. 64021900 | 2. 77425100  | -1. 48969000 |
| H | -1. 48158000 | 3. 74063600  | 0. 23145300  |



|   |             |             |             |
|---|-------------|-------------|-------------|
| H | -2.59951300 | 2.65173700  | -0.58051800 |
| C | -1.09261700 | 3.79550500  | -2.52867200 |
| H | 0.38348900  | 2.99850800  | -1.16794800 |
| H | -0.61628800 | 1.77231800  | -1.93647000 |
| H | -0.42100600 | 3.81876500  | -3.39068400 |
| H | -2.09807600 | 3.55818500  | -2.89265400 |
| H | -1.12459300 | 4.80182300  | -2.09912100 |
| H | -2.58819700 | -0.25213800 | 2.91472000  |
| O | -0.54290000 | -0.00334500 | 2.79294600  |

**si-M1**

|   |             |             |             |
|---|-------------|-------------|-------------|
| O | -0.86073900 | 1.32245500  | 0.93045800  |
| N | 2.89794800  | 0.94589500  | -1.65236000 |
| N | 2.52759400  | 0.17995000  | -2.72166100 |
| N | 0.77797000  | 0.95060400  | -1.61264300 |
| C | 5.04534500  | 1.82114500  | -2.30617200 |
| H | 4.55998200  | 2.17656300  | -3.20916800 |
| C | 6.39621000  | 2.03129200  | -2.07902200 |
| H | 6.99418100  | 2.56518200  | -2.80899800 |
| C | 6.96942800  | 1.55416800  | -0.90106600 |
| H | 8.02416900  | 1.71843100  | -0.70634700 |
| C | 6.19955500  | 0.86344100  | 0.02468600  |
| H | 6.66554700  | 0.48855600  | 0.93098800  |
| C | 4.83411200  | 0.62023400  | -0.17564400 |
| C | 4.29125400  | 1.13454400  | -1.35692500 |
| C | 1.85437000  | 1.43843600  | -0.97611700 |
| C | 1.22883200  | 0.20640200  | -2.66678400 |
| C | 0.11144600  | -0.34821000 | -3.47960200 |
| H | 0.19105800  | -1.43523700 | -3.55418400 |
| H | 0.14669000  | 0.05239700  | -4.49495100 |
| C | -1.14406500 | 0.13844300  | -2.69892600 |
| H | -1.80442800 | -0.69249300 | -2.44910900 |
| H | -1.72831000 | 0.82143600  | -3.31709500 |
| C | -0.68401000 | 0.88407900  | -1.40626500 |
| H | -1.06946500 | 1.90527200  | -1.36586700 |
| C | -1.04274700 | 0.31859900  | 0.04216100  |
| C | -2.54148200 | -0.05275100 | -0.00726600 |
| C | -3.03838100 | -1.31338200 | -0.31847200 |
| C | -3.44891900 | 0.97627000  | 0.27064700  |
| C | -4.41629100 | -1.53558400 | -0.38160100 |
| H | -2.36728800 | -2.14932600 | -0.49889100 |
| C | -4.81376600 | 0.74522400  | 0.20085200  |
| H | -3.05215300 | 1.94108900  | 0.56589800  |
| C | -5.31535700 | -0.51371900 | -0.13079500 |

|   |             |             |             |
|---|-------------|-------------|-------------|
| C | -0.17785700 | -0.90756900 | 0.39864200  |
| C | 0.21050900  | -1.88590000 | -0.51323900 |
| C | 0.27585600  | -1.01614700 | 1.71625300  |
| C | 1.05909800  | -2.92472000 | -0.13721800 |
| H | -0.13320800 | -1.85737100 | -1.53987900 |
| C | 1.08726600  | -2.07910600 | 2.09516200  |
| H | -0.00385300 | -0.24206500 | 2.42195900  |
| C | 1.49705200  | -3.03971900 | 1.17349200  |
| H | -6.38403300 | -0.69230300 | -0.18062500 |
| H | 2.16284500  | -3.84459800 | 1.46745200  |
| H | 0.41275100  | 1.60086700  | 1.20285200  |
| C | -5.79966400 | 1.84467500  | 0.47946900  |
| C | -4.89149400 | -2.90924500 | -0.75882100 |
| C | 1.51710000  | -2.22831400 | 3.52823400  |
| C | 1.48849600  | -3.93104400 | -1.16515200 |
| F | 2.72807500  | -4.37886700 | -0.92586700 |
| F | 1.48207300  | -3.39773800 | -2.40204900 |
| F | 0.68044800  | -4.99874400 | -1.19804600 |
| F | 1.47355900  | -1.06832300 | 4.19136400  |
| F | 2.77856200  | -2.69468700 | 3.61323300  |
| F | 0.74169700  | -3.09921900 | 4.18805200  |
| F | -5.19932200 | 2.99694800  | 0.79729700  |
| F | -6.57887600 | 2.07638100  | -0.59051900 |
| F | -6.62166800 | 1.52136800  | 1.48873900  |
| F | -4.51994800 | -3.21936100 | -2.01337000 |
| F | -6.22342500 | -3.02076000 | -0.69542400 |
| F | -4.36334100 | -3.84818500 | 0.03892100  |
| C | 4.05574900  | -0.19826000 | 0.84202000  |
| C | 4.12401200  | 0.42471500  | 2.24035500  |
| C | 4.58327400  | -1.64021500 | 0.85676500  |
| H | 2.99589100  | -0.22748900 | 0.56139000  |
| H | 3.72094300  | 1.43916500  | 2.24478000  |
| H | 3.51813700  | -0.16648300 | 2.93155900  |
| H | 5.15138800  | 0.43619500  | 2.61939100  |
| H | 4.40226200  | -2.14667100 | -0.09598700 |
| H | 5.65975100  | -1.66055900 | 1.05540900  |
| H | 4.08781500  | -2.20282300 | 1.65110600  |
| C | 0.16234600  | 4.19711700  | 0.39347000  |
| C | 1.20312800  | 3.68254500  | -0.25558500 |
| H | -0.19898700 | 3.67640600  | 1.27811900  |
| C | 1.91837900  | 2.41835600  | 0.19285800  |
| H | 1.60355200  | 4.17068800  | -1.14604600 |
| C | -0.53866400 | 5.46449800  | 0.00610800  |
| C | -0.43261000 | 6.54203700  | 1.09200300  |

|   |             |            |             |
|---|-------------|------------|-------------|
| H | -1.60213300 | 5.25072700 | -0.17026100 |
| H | -0.13022000 | 5.85088800 | -0.93623400 |
| C | -1.18567900 | 7.81475100 | 0.71702700  |
| H | -0.82288700 | 6.14047100 | 2.03443800  |
| H | 0.62587200  | 6.76599200 | 1.26626700  |
| H | -1.09387900 | 8.57758100 | 1.49407400  |
| H | -0.79839500 | 8.23728100 | -0.21559900 |
| H | -2.25081200 | 7.60959500 | 0.57114000  |
| H | 2.99124900  | 2.65137100 | 0.29136700  |
| O | 1.46697900  | 1.84058200 | 1.34998300  |

**TS2**

|   |             |             |             |
|---|-------------|-------------|-------------|
| O | -1.34216000 | 1.35255300  | 1.50914500  |
| N | 2.34290700  | 0.77440900  | -1.62874200 |
| N | 1.68687300  | 0.31121300  | -2.74974300 |
| N | 0.28291400  | 1.26145800  | -1.32537900 |
| C | 4.50627600  | 1.86732700  | -1.57696700 |
| H | 3.99007100  | 2.82104400  | -1.61421200 |
| C | 5.89248400  | 1.81032100  | -1.53177100 |
| H | 6.46869300  | 2.72883300  | -1.52558800 |
| C | 6.52912000  | 0.57282100  | -1.50947000 |
| H | 7.61260400  | 0.51767900  | -1.48375700 |
| C | 5.78087100  | -0.59798300 | -1.52529600 |
| H | 6.29462000  | -1.55432700 | -1.52049500 |
| C | 4.38243600  | -0.57929000 | -1.54675400 |
| C | 3.77475900  | 0.68102900  | -1.57241700 |
| C | 1.50471300  | 1.36542500  | -0.74071400 |
| C | 0.45427000  | 0.62216200  | -2.52878500 |
| C | -0.83305000 | 0.45230800  | -3.25436800 |
| H | -1.01507600 | -0.60304700 | -3.46985400 |
| H | -0.81216200 | 0.98284100  | -4.20824100 |
| C | -1.85807000 | 1.07181000  | -2.26495100 |
| H | -2.27236000 | 1.99026800  | -2.68295700 |
| H | -2.69696100 | 0.39888200  | -2.08802000 |
| C | -1.12489800 | 1.42519700  | -0.92891000 |
| H | -1.29464700 | 2.47129600  | -0.66442200 |
| C | -1.52224700 | 0.57995800  | 0.36447900  |
| C | -3.03239500 | 0.30919200  | 0.32207400  |
| C | -3.61255300 | -0.94578600 | 0.18771100  |
| C | -3.87023800 | 1.42631700  | 0.44216100  |
| C | -5.00291000 | -1.07823100 | 0.14121500  |
| H | -3.00365500 | -1.84147000 | 0.12793000  |
| C | -5.24692200 | 1.28291400  | 0.38599800  |
| H | -3.43298200 | 2.40714000  | 0.59709300  |

|   |             |             |             |
|---|-------------|-------------|-------------|
| C | -5.83155600 | 0.02612300  | 0.22943400  |
| C | -0.67920700 | -0.69465000 | 0.42646600  |
| C | -0.65806800 | -1.60537900 | -0.63069000 |
| C | 0.14950400  | -0.92599900 | 1.52337100  |
| C | 0.15550000  | -2.73089500 | -0.58399300 |
| H | -1.28649700 | -1.45112600 | -1.50419700 |
| C | 0.94927500  | -2.06696100 | 1.56592900  |
| H | 0.16208500  | -0.21157000 | 2.34013100  |
| C | 0.95172900  | -2.98584200 | 0.52535800  |
| H | -6.90896200 | -0.08318300 | 0.17864900  |
| H | 1.57492700  | -3.87013500 | 0.56983500  |
| H | -0.50210100 | 1.88663100  | 1.42235300  |
| C | -6.13836200 | 2.48278300  | 0.55284100  |
| C | -5.57517200 | -2.46202000 | 0.00666200  |
| C | 1.86592700  | -2.27294200 | 2.74047100  |
| C | 0.18418900  | -3.63450500 | -1.78238900 |
| F | -0.96446100 | -4.30309500 | -1.93978400 |
| F | 1.17376500  | -4.53494500 | -1.70632100 |
| F | 0.37533800  | -2.91871400 | -2.90631700 |
| F | 2.32518300  | -3.52969600 | 2.79932000  |
| F | 1.25200600  | -2.00511100 | 3.89933100  |
| F | 2.93830300  | -1.46409400 | 2.66788400  |
| F | -5.51314300 | 3.61713300  | 0.21351200  |
| F | -7.23830300 | 2.37825600  | -0.20711800 |
| F | -6.54793700 | 2.61579600  | 1.82111900  |
| F | -5.03293100 | -3.10856300 | -1.03720500 |
| F | -6.90120000 | -2.44146200 | -0.17187800 |
| F | -5.32199800 | -3.20150700 | 1.09456100  |
| C | 3.59318900  | -1.87456000 | -1.59526900 |
| C | 4.08824300  | -2.89237500 | -0.56390300 |
| C | 3.63648500  | -2.46210600 | -3.01211000 |
| H | 2.54729200  | -1.64390900 | -1.36255100 |
| H | 4.01332200  | -2.50142700 | 0.45548700  |
| H | 3.49018700  | -3.80512300 | -0.63704800 |
| H | 5.12863200  | -3.17803600 | -0.74428100 |
| H | 3.22698100  | -1.75292400 | -3.73487100 |
| H | 4.66876200  | -2.69397000 | -3.29547000 |
| H | 3.05198700  | -3.38474900 | -3.05760900 |
| C | 2.80151400  | 1.91827800  | 2.69702500  |
| C | 2.78388100  | 1.57415800  | 1.40737600  |
| H | 2.08786900  | 2.66270800  | 3.04775200  |
| C | 1.85109500  | 2.16096500  | 0.41754700  |
| H | 3.48929300  | 0.83074500  | 1.03901000  |
| C | 3.73842500  | 1.33171800  | 3.71117700  |

|   |            |             |             |
|---|------------|-------------|-------------|
| C | 3.00588700 | 0.78950400  | 4.94270000  |
| H | 4.45609500 | 2.09590500  | 4.04340300  |
| H | 4.32619200 | 0.52960800  | 3.24887000  |
| C | 3.94526200 | 0.06252200  | 5.89890600  |
| H | 2.50979100 | 1.62051900  | 5.45886700  |
| H | 2.21318300 | 0.10845000  | 4.61787600  |
| H | 3.42225000 | -0.27993500 | 6.79547600  |
| H | 4.38446400 | -0.81342900 | 5.41045600  |
| H | 4.76649700 | 0.71377200  | 6.21572100  |
| H | 2.37944100 | 3.27612200  | -0.23563300 |
| O | 0.71797200 | 2.75712500  | 1.00993300  |
| C | 1.48097300 | 4.86609400  | -1.22256100 |
| O | 2.58927500 | 4.32858800  | -0.84671000 |
| O | 0.35681900 | 4.49497200  | -0.83923500 |
| H | 0.47703900 | 3.53474300  | 0.41894000  |
| C | 1.61585700 | 6.02143400  | -2.18486200 |
| H | 0.63420600 | 6.36556300  | -2.50553500 |
| H | 2.15021900 | 6.83419400  | -1.68725300 |
| H | 2.21569900 | 5.71496700  | -3.04411100 |

**TS2<sup>D</sup>**

|   |             |             |             |
|---|-------------|-------------|-------------|
| O | 0.96603400  | -1.89513600 | 0.82277700  |
| N | -2.58518400 | -1.09824600 | -2.10161700 |
| N | -2.02812600 | -0.35147100 | -3.12063100 |
| N | -0.47839700 | -1.43344400 | -1.96355800 |
| C | -4.67275100 | -2.18376200 | -2.64365400 |
| H | -4.10190300 | -2.85739700 | -3.27443800 |
| C | -6.05038300 | -2.30300700 | -2.51394100 |
| H | -6.58302200 | -3.08121900 | -3.04909300 |
| C | -6.73352200 | -1.41608100 | -1.68696800 |
| H | -7.80976400 | -1.50000800 | -1.57490400 |
| C | -6.04732800 | -0.42307000 | -0.99399900 |
| H | -6.60127500 | 0.25219000  | -0.35017500 |
| C | -4.66162900 | -0.28014200 | -1.10475200 |
| C | -4.00425300 | -1.18116800 | -1.94901400 |
| C | -1.65664000 | -1.78533600 | -1.38763600 |
| C | -0.76270000 | -0.58311900 | -3.00341100 |
| C | 0.48203900  | -0.15285000 | -3.70099700 |
| H | 0.52527700  | 0.93500000  | -3.79235700 |
| H | 0.51572700  | -0.56588500 | -4.71154300 |
| C | 1.60094900  | -0.74829100 | -2.79516500 |
| H | 2.19890400  | -1.46618700 | -3.35786600 |
| H | 2.28816500  | 0.02682700  | -2.45625300 |
| C | 0.93395200  | -1.48245100 | -1.58386600 |

|   |              |              |              |
|---|--------------|--------------|--------------|
| H | 1. 24884300  | -2. 52691400 | -1. 53023800 |
| C | 1. 21498400  | -0. 91623200 | -0. 12653000 |
| C | 2. 72529300  | -0. 62151800 | -0. 04658600 |
| C | 3. 28960600  | 0. 64752500  | -0. 16066800 |
| C | 3. 57300200  | -1. 71678500 | 0. 13560500  |
| C | 4. 67340200  | 0. 80877400  | -0. 11397100 |
| H | 2. 66505400  | 1. 52936900  | -0. 26751100 |
| C | 4. 95075200  | -1. 54356300 | 0. 17626900  |
| H | 3. 13863400  | -2. 70140000 | 0. 27239700  |
| C | 5. 51817900  | -0. 27975000 | 0. 04978000  |
| C | 0. 38949900  | 0. 33530800  | 0. 20001200  |
| C | 0. 17645000  | 1. 36506400  | -0. 71134400 |
| C | -0. 10090900 | 0. 48709400  | 1. 50306200  |
| C | -0. 51013100 | 2. 52024900  | -0. 34192400 |
| H | 0. 56953700  | 1. 30871900  | -1. 71941800 |
| C | -0. 74457500 | 1. 66203300  | 1. 87497000  |
| H | 0. 05715700  | -0. 31588900 | 2. 21431500  |
| C | -0. 96561400 | 2. 68779900  | 0. 95590000  |
| H | 6. 59307900  | -0. 14548100 | 0. 08781900  |
| H | -1. 46480700 | 3. 60446100  | 1. 25411500  |
| H | 0. 31595100  | -2. 61640300 | 0. 48509200  |
| C | 5. 82857300  | -2. 73919300 | 0. 42469400  |
| C | 5. 24800600  | 2. 18553000  | -0. 29965400 |
| C | -1. 16527600 | 1. 90011100  | 3. 30191300  |
| C | -0. 64926600 | 3. 61142000  | -1. 36469700 |
| F | 0. 50684400  | 4. 26945100  | -1. 53496400 |
| F | -1. 57677000 | 4. 51270800  | -1. 02002900 |
| F | -0. 98624800 | 3. 11082000  | -2. 56582400 |
| F | -0. 74794000 | 3. 10459500  | 3. 72028000  |
| F | -0. 66942500 | 0. 98326700  | 4. 13755600  |
| F | -2. 50333500 | 1. 89312500  | 3. 44492200  |
| F | 5. 35936300  | -3. 82720600 | -0. 20191700 |
| F | 7. 08184100  | -2. 53094900 | -0. 00277700 |
| F | 5. 89825900  | -3. 03524900 | 1. 72926200  |
| F | 5. 31031100  | 2. 51495400  | -1. 59998100 |
| F | 6. 48976800  | 2. 27811700  | 0. 19224100  |
| F | 4. 49553100  | 3. 11633400  | 0. 30225000  |
| C | -3. 90473100 | 0. 81855900  | -0. 38178800 |
| C | -4. 48953000 | 1. 13960800  | 0. 99330700  |
| C | -3. 86236700 | 2. 06947200  | -1. 27002000 |
| H | -2. 87136900 | 0. 47530600  | -0. 22618900 |
| H | -4. 58061500 | 0. 24068600  | 1. 61285800  |
| H | -3. 83463500 | 1. 84049500  | 1. 51504600  |
| H | -5. 47611900 | 1. 60733300  | 0. 91474000  |

|   |             |             |             |
|---|-------------|-------------|-------------|
| H | -3.32861600 | 1.87244600  | -2.20404500 |
| H | -4.88057800 | 2.38970500  | -1.51559800 |
| H | -3.36631600 | 2.89307100  | -0.74964300 |
| C | -2.46023500 | -2.94804300 | 2.00122000  |
| C | -2.72380700 | -2.52139300 | 0.76379300  |
| H | -1.55561000 | -3.52871100 | 2.17044200  |
| C | -1.83426600 | -2.77442900 | -0.37745300 |
| H | -3.62187100 | -1.93408600 | 0.57597400  |
| C | -3.28227000 | -2.53538600 | 3.18759600  |
| C | -2.64882100 | -1.31710500 | 3.87050200  |
| H | -3.37650400 | -3.35540700 | 3.91024600  |
| H | -4.29954000 | -2.27507500 | 2.86576500  |
| C | -3.45062900 | -0.79164900 | 5.05470300  |
| H | -1.62881800 | -1.56929600 | 4.18612200  |
| H | -2.54979000 | -0.53130400 | 3.11231500  |
| H | -2.96286700 | 0.07669100  | 5.50422500  |
| H | -4.45424700 | -0.48701100 | 4.73941600  |
| H | -3.56284000 | -1.55796500 | 5.82824300  |
| H | -1.59662400 | -3.89213500 | -0.81181100 |
| O | -0.61963100 | -3.53454300 | -0.12006600 |

#### TS2<sup>w</sup>

|   |             |             |             |
|---|-------------|-------------|-------------|
| O | 0.96848100  | -1.72120100 | 1.03987300  |
| N | -2.59834300 | -1.12697000 | -1.93243100 |
| N | -2.03706500 | -0.47550300 | -3.00655800 |
| N | -0.50686600 | -1.45896800 | -1.74638100 |
| C | -4.71028000 | -2.26205300 | -2.22507500 |
| H | -4.16073600 | -3.06340400 | -2.70991000 |
| C | -6.08752600 | -2.32209700 | -2.05127900 |
| H | -6.64435600 | -3.17898000 | -2.41375000 |
| C | -6.73956000 | -1.27470100 | -1.40623700 |
| H | -7.81538900 | -1.31086400 | -1.26827900 |
| C | -6.02301000 | -0.18452500 | -0.92108600 |
| H | -6.55105200 | 0.61107100  | -0.40575400 |
| C | -4.63629400 | -0.09953000 | -1.06946600 |
| C | -4.01750800 | -1.15500300 | -1.74785500 |
| C | -1.68844500 | -1.74522600 | -1.15507000 |
| C | -0.77274400 | -0.70889500 | -2.86382800 |
| C | 0.47402400  | -0.38276800 | -3.61119300 |
| H | 0.55698400  | 0.69184800  | -3.78990800 |
| H | 0.47073900  | -0.87541700 | -4.58583900 |
| C | 1.58416800  | -0.95244500 | -2.67936200 |
| H | 2.12225700  | -1.75425900 | -3.18589700 |
| H | 2.32357900  | -0.19156900 | -2.43039700 |

|   |             |             |             |
|---|-------------|-------------|-------------|
| C | 0.91507600  | -1.53486800 | -1.38999900 |
| H | 1.18613900  | -2.58286100 | -1.24828400 |
| C | 1.23968500  | -0.84224000 | -0.00181300 |
| C | 2.75977100  | -0.59030600 | 0.03917700  |
| C | 3.36084100  | 0.63309200  | -0.24073800 |
| C | 3.57725900  | -1.68123100 | 0.35360900  |
| C | 4.75088000  | 0.75476900  | -0.23171500 |
| H | 2.76426400  | 1.51253200  | -0.46515600 |
| C | 4.95848200  | -1.54724000 | 0.35932400  |
| H | 3.11580800  | -2.62742200 | 0.61333400  |
| C | 5.56326000  | -0.32829000 | 0.06163000  |
| C | 0.46046100  | 0.46508500  | 0.20373700  |
| C | 0.28724700  | 1.40313900  | -0.80932900 |
| C | -0.02965700 | 0.76733100  | 1.48040700  |
| C | -0.36490900 | 2.61039100  | -0.56968900 |
| H | 0.68988500  | 1.23459200  | -1.80064800 |
| C | -0.64149000 | 1.99331800  | 1.72062400  |
| H | 0.10040100  | 0.03973100  | 2.27382700  |
| C | -0.82641600 | 2.92445700  | 0.69773900  |
| H | 6.64247000  | -0.22804300 | 0.05883400  |
| H | -1.30026200 | 3.88125700  | 0.89306300  |
| H | 0.28585000  | -2.42369900 | 0.77684600  |
| C | 5.81942200  | -2.71818300 | 0.74727900  |
| C | 5.34190400  | 2.09418000  | -0.57110400 |
| C | -1.08084900 | 2.38901100  | 3.10647400  |
| C | -0.46002400 | 3.58599500  | -1.70735900 |
| F | 0.73187500  | 4.13921900  | -1.97339700 |
| F | -1.31899800 | 4.58015000  | -1.45313100 |
| F | -0.85858600 | 2.97324200  | -2.83605800 |
| F | -0.66752100 | 3.63145000  | 3.39633000  |
| F | -0.59978600 | 1.57038000  | 4.04645400  |
| F | -2.42095900 | 2.39723800  | 3.22539300  |
| F | 5.22909200  | -3.88409600 | 0.45517000  |
| F | 7.00002900  | -2.68683300 | 0.11227600  |
| F | 6.07948300  | -2.72166200 | 2.06165600  |
| F | 4.97677200  | 2.47964300  | -1.80514200 |
| F | 6.67893900  | 2.08045100  | -0.53028500 |
| F | 4.91621000  | 3.04540800  | 0.27102100  |
| C | -3.83703500 | 1.07504200  | -0.53477500 |
| C | -4.38222400 | 1.60387100  | 0.79246900  |
| C | -3.77735500 | 2.18887000  | -1.58801500 |
| H | -2.81021000 | 0.72719000  | -0.34954600 |
| H | -4.47643500 | 0.80674700  | 1.53744100  |
| H | -3.70234000 | 2.35774200  | 1.19500800  |



|   |             |             |             |
|---|-------------|-------------|-------------|
| H | -5.36046000 | 2.07837200  | 0.66643500  |
| H | -3.29542700 | 1.84138600  | -2.50550900 |
| H | -4.78965300 | 2.52581400  | -1.83552200 |
| H | -3.22008600 | 3.04816500  | -1.20364500 |
| C | -2.46775900 | -2.51072300 | 2.33285900  |
| C | -2.75239300 | -2.23485400 | 1.06047200  |
| H | -1.56962000 | -3.08453300 | 2.55418600  |
| C | -1.92972700 | -2.70257100 | -0.08469800 |
| H | -3.64752600 | -1.65958200 | 0.82354200  |
| C | -3.26005900 | -1.96384600 | 3.48468900  |
| C | -2.57286500 | -0.72003400 | 4.05726900  |
| H | -3.37842600 | -2.71763400 | 4.27328700  |
| H | -4.26967900 | -1.69237600 | 3.14922200  |
| C | -3.33267300 | -0.07260800 | 5.20833500  |
| H | -1.55592400 | -0.98180100 | 4.37570200  |
| H | -2.46295900 | -0.00190300 | 3.23736600  |
| H | -2.80876800 | 0.81442300  | 5.57291200  |
| H | -4.33349300 | 0.23586700  | 4.88838600  |
| H | -3.44967100 | -0.76850800 | 6.04503000  |
| H | -2.37331100 | -3.75771500 | -0.72867700 |
| O | -0.74227300 | -3.37063100 | 0.25270500  |
| O | -1.84467100 | -4.94340700 | -1.10504100 |
| H | -0.98626900 | -4.31431700 | -0.30888300 |
| H | -2.28171300 | -5.64705800 | -0.61254800 |

**M2**

|   |             |             |             |
|---|-------------|-------------|-------------|
| O | -1.29703200 | -2.16719500 | -0.36996200 |
| N | 2.23177300  | 0.13719400  | 1.90917200  |
| N | 1.50978200  | 1.08001300  | 2.67004800  |
| N | 0.18954000  | -0.64478100 | 2.13316500  |
| C | 4.01774800  | -0.78795000 | 3.27428100  |
| H | 3.25255000  | -1.31394700 | 3.83781600  |
| C | 5.36302400  | -0.91651500 | 3.59425600  |
| H | 5.66889400  | -1.54468600 | 4.42407200  |
| C | 6.31003900  | -0.22728700 | 2.84174200  |
| H | 7.36478500  | -0.31805800 | 3.08128100  |
| C | 5.91262100  | 0.57352300  | 1.77561900  |
| H | 6.66678500  | 1.09246200  | 1.19269300  |
| C | 4.56542400  | 0.71205800  | 1.42992500  |
| C | 3.62981800  | 0.02149600  | 2.20959800  |
| C | 1.43599200  | -0.97404600 | 1.61528400  |
| C | 0.32855600  | 0.59248900  | 2.73561400  |
| C | -0.98229900 | 1.08922500  | 3.24043000  |
| H | -1.16186700 | 2.10711200  | 2.88798700  |

|   |             |             |             |
|---|-------------|-------------|-------------|
| H | -0.99647700 | 1.11205500  | 4.33219400  |
| C | -1.98292100 | 0.04752300  | 2.67018900  |
| H | -2.78663700 | 0.52886900  | 2.11239000  |
| H | -2.45661900 | -0.50640600 | 3.48225800  |
| C | -1.19161700 | -0.95974000 | 1.76957200  |
| H | -1.42244300 | -1.99056700 | 2.05333300  |
| C | -1.49063900 | -0.90117500 | 0.20346900  |
| C | -2.98745500 | -0.63907600 | -0.00697200 |
| C | -3.52058500 | 0.49112700  | -0.61640400 |
| C | -3.86558600 | -1.63128800 | 0.44728900  |
| C | -4.90412100 | 0.64040600  | -0.73591200 |
| H | -2.87821900 | 1.27199800  | -1.00760100 |
| C | -5.23693900 | -1.46708000 | 0.33397500  |
| H | -3.46542500 | -2.54154800 | 0.88039200  |
| C | -5.77408800 | -0.32448400 | -0.25581700 |
| C | -0.58847200 | 0.14576200  | -0.44776500 |
| C | -0.61452700 | 1.47712600  | -0.03870800 |
| C | 0.34495300  | -0.23761700 | -1.41072700 |
| C | 0.26799800  | 2.40808300  | -0.57826700 |
| H | -1.33800200 | 1.81431400  | 0.69953400  |
| C | 1.22353000  | 0.70013200  | -1.94407700 |
| H | 0.38840500  | -1.27325300 | -1.73060900 |
| C | 1.19340100  | 2.03210900  | -1.54062800 |
| H | -6.84768700 | -0.19181000 | -0.33287600 |
| H | 1.88009900  | 2.75741000  | -1.96298700 |
| H | -0.52694600 | -2.61967300 | 0.03070900  |
| C | -6.16880000 | -2.54846400 | 0.80690800  |
| C | -5.44476100 | 1.85508200  | -1.43937100 |
| C | 2.27654800  | 0.23953100  | -2.91338800 |
| C | 0.16757300  | 3.82363300  | -0.08840400 |
| F | 1.11306400  | 4.61172000  | -0.61140800 |
| F | 0.27708000  | 3.87892200  | 1.24946000  |
| F | -1.02343400 | 4.35950600  | -0.39738200 |
| F | 1.80203200  | -0.68687800 | -3.75666400 |
| F | 3.32519000  | -0.31524800 | -2.27722500 |
| F | 2.75858600  | 1.25380400  | -3.64525000 |
| F | -5.58779000 | -3.33941600 | 1.71939800  |
| F | -7.27350100 | -2.02810000 | 1.36136400  |
| F | -6.56899900 | -3.33193900 | -0.20316200 |
| F | -6.70533600 | 2.11829100  | -1.07076100 |
| F | -5.44338500 | 1.69245400  | -2.76943400 |
| F | -4.70546700 | 2.94195600  | -1.17587400 |
| C | 4.10598300  | 1.56842200  | 0.26812800  |
| C | 5.15415300  | 1.70981800  | -0.83501500 |

|   |             |              |              |
|---|-------------|--------------|--------------|
| C | 3. 64873700 | 2. 94468300  | 0. 76994400  |
| H | 3. 23468100 | 1. 05970500  | -0. 15989500 |
| H | 5. 55918900 | 0. 73907000  | -1. 13497100 |
| H | 4. 70068800 | 2. 17048500  | -1. 71809100 |
| H | 5. 98486600 | 2. 35095100  | -0. 52156400 |
| H | 2. 81196400 | 2. 85590200  | 1. 46854300  |
| H | 4. 47385200 | 3. 44875000  | 1. 28481300  |
| H | 3. 34074600 | 3. 57812600  | -0. 06763900 |
| C | 3. 11282600 | -3. 31383000 | -0. 74283200 |
| C | 2. 92880500 | -2. 28561400 | 0. 10119700  |
| H | 2. 35047100 | -4. 09016500 | -0. 82201800 |
| C | 1. 77270300 | -2. 10934500 | 0. 94572200  |
| H | 3. 68160900 | -1. 50138300 | 0. 14463400  |
| C | 4. 29188300 | -3. 44484200 | -1. 66013100 |
| C | 3. 88307000 | -3. 57603800 | -3. 13171300 |
| H | 4. 89072900 | -4. 32628900 | -1. 38659800 |
| H | 4. 94724900 | -2. 57289700 | -1. 53867300 |
| C | 5. 08730200 | -3. 72116200 | -4. 05688900 |
| H | 3. 22178600 | -4. 44480300 | -3. 24339300 |
| H | 3. 29373900 | -2. 69849000 | -3. 41525300 |
| H | 4. 78130400 | -3. 82153200 | -5. 10136300 |
| H | 5. 74221400 | -2. 84713500 | -3. 98278900 |
| H | 5. 68044300 | -4. 60292500 | -3. 79369800 |
| O | 0. 78628100 | -3. 10448600 | 0. 93570500  |
| H | 1. 20000700 | -3. 95085900 | 1. 14646500  |

**TS3(RR)**

|   |              |              |              |
|---|--------------|--------------|--------------|
| O | -0. 53873300 | -0. 87786900 | 1. 31012000  |
| N | 2. 39205400  | 1. 82461300  | -1. 86661300 |
| N | 1. 46096200  | 2. 01291400  | -2. 86652400 |
| N | 0. 52330200  | 1. 12184900  | -1. 05050900 |
| C | 4. 01343000  | 3. 57062700  | -2. 21986100 |
| H | 3. 18253300  | 4. 26908600  | -2. 19861500 |
| C | 5. 32417100  | 4. 00471500  | -2. 37893900 |
| H | 5. 53910300  | 5. 06208400  | -2. 48908500 |
| C | 6. 35105800  | 3. 06697400  | -2. 38176700 |
| H | 7. 38115000  | 3. 39056500  | -2. 49050900 |
| C | 6. 06795400  | 1. 70893000  | -2. 25513400 |
| H | 6. 88646500  | 0. 99827500  | -2. 27398000 |
| C | 4. 76017800  | 1. 23890500  | -2. 11227500 |
| C | 3. 75117800  | 2. 21189900  | -2. 07638300 |
| C | 1. 83666600  | 1. 35536900  | -0. 71300900 |
| C | 0. 36559000  | 1. 57797700  | -2. 34148300 |
| C | -1. 06466600 | 1. 62610600  | -2. 74160000 |

|   |             |             |             |
|---|-------------|-------------|-------------|
| H | -1.33187300 | 0.76026100  | -3.35193300 |
| H | -1.27791600 | 2.52658000  | -3.31825200 |
| C | -1.75229800 | 1.62525200  | -1.35596000 |
| H | -2.70929900 | 1.10462800  | -1.37081600 |
| H | -1.95490800 | 2.65509900  | -1.05200700 |
| C | -0.76082200 | 0.99732100  | -0.32041600 |
| H | -0.68480800 | 1.61548700  | 0.57974700  |
| C | -1.18042800 | -0.45826600 | 0.13855400  |
| C | -2.67954300 | -0.44537700 | 0.49251700  |
| C | -3.60786100 | -1.37745000 | 0.04461300  |
| C | -3.08185600 | 0.48121700  | 1.46687500  |
| C | -4.92021300 | -1.35248400 | 0.52347500  |
| H | -3.32837200 | -2.14935300 | -0.66453400 |
| C | -4.38249300 | 0.48548800  | 1.94464100  |
| H | -2.36483200 | 1.18207700  | 1.89147700  |
| C | -5.32456900 | -0.42525500 | 1.46848100  |
| C | -0.74669600 | -1.42131100 | -0.95621000 |
| C | -1.42206300 | -1.55145000 | -2.16667000 |
| C | 0.47309200  | -2.08481500 | -0.79018200 |
| C | -0.88895600 | -2.32897100 | -3.19357500 |
| H | -2.36499100 | -1.03787400 | -2.33635500 |
| C | 0.98197400  | -2.87113300 | -1.81640300 |
| H | 1.01721600  | -1.95074300 | 0.14015400  |
| C | 0.31371500  | -3.00104400 | -3.03047400 |
| H | -6.34503300 | -0.41319600 | 1.83316500  |
| H | 0.72873700  | -3.59964800 | -3.83306200 |
| H | -0.54238300 | -0.15817900 | 1.96606100  |
| C | -4.75324400 | 1.43514600  | 3.05143400  |
| C | -5.87952600 | -2.38683200 | 0.00352500  |
| C | 2.26143500  | -3.62373900 | -1.57900400 |
| C | -1.66274100 | -2.42514300 | -4.47686300 |
| F | -2.06198700 | -1.20427500 | -4.88613000 |
| F | -2.77169400 | -3.16086900 | -4.33050900 |
| F | -0.94150700 | -2.96666800 | -5.46272200 |
| F | 2.05284800  | -4.74898700 | -0.88666500 |
| F | 3.14087400  | -2.88830300 | -0.88005700 |
| F | 2.85664300  | -3.97223600 | -2.73236600 |
| F | -4.06176000 | 2.57831100  | 2.97485000  |
| F | -6.05840400 | 1.74116300  | 3.01945700  |
| F | -4.50277900 | 0.90025600  | 4.25620000  |
| F | -5.88746600 | -2.40674400 | -1.33843300 |
| F | -7.13323000 | -2.16128100 | 0.41405000  |
| F | -5.53484500 | -3.61707600 | 0.40713900  |
| C | 4.42565900  | -0.24241800 | -2.06056000 |

|   |              |              |              |
|---|--------------|--------------|--------------|
| C | 5. 63579500  | -1. 12665400 | -1. 76536300 |
| C | 3. 76868300  | -0. 66785100 | -3. 38345300 |
| H | 3. 70179400  | -0. 40091500 | -1. 25238500 |
| H | 6. 14440500  | -0. 82123000 | -0. 84626100 |
| H | 5. 30511200  | -2. 15987100 | -1. 64535800 |
| H | 6. 35798000  | -1. 10295700 | -2. 58841100 |
| H | 2. 85936100  | -0. 09717800 | -3. 59230900 |
| H | 4. 46375700  | -0. 51031000 | -4. 21481300 |
| H | 3. 51322800  | -1. 73031200 | -3. 35292200 |
| C | 3. 77852400  | 2. 02373300  | 2. 39465000  |
| C | 3. 49568500  | 1. 95907800  | 1. 03925700  |
| H | 3. 32279600  | 1. 27083100  | 3. 03273400  |
| C | 2. 43877600  | 1. 18068200  | 0. 55189300  |
| H | 4. 00454800  | 2. 65266200  | 0. 37188300  |
| C | 5. 01826600  | 2. 69075400  | 2. 91129000  |
| C | 6. 23802600  | 1. 75808000  | 2. 87913800  |
| H | 4. 85799700  | 3. 03143200  | 3. 94345400  |
| H | 5. 23823100  | 3. 59017700  | 2. 31896000  |
| C | 7. 48420500  | 2. 41900200  | 3. 46116900  |
| H | 6. 00631400  | 0. 84053200  | 3. 43267400  |
| H | 6. 41906100  | 1. 45421600  | 1. 84069700  |
| H | 8. 34914300  | 1. 75169900  | 3. 42238000  |
| H | 7. 73594300  | 3. 33010400  | 2. 90912000  |
| H | 7. 32346200  | 2. 69992600  | 4. 50686900  |
| O | 1. 82563400  | 0. 28781000  | 1. 36673400  |
| H | 1. 18518000  | 0. 77273300  | 1. 96820700  |
| C | -0. 21047200 | 2. 57775200  | 5. 82844400  |
| C | 1. 21375700  | 3. 10539400  | 3. 89652800  |
| C | 0. 17890500  | 2. 13133400  | 3. 69485100  |
| N | -0. 60572200 | 1. 88989500  | 4. 80217900  |
| O | -0. 02006200 | 1. 53297900  | 2. 59366400  |
| S | 1. 16897900  | 3. 63681200  | 5. 56365900  |
| C | 1. 98815800  | 3. 55344800  | 2. 82983400  |
| H | 1. 58759800  | 3. 21336100  | 1. 87773600  |
| C | -0. 88020100 | 2. 51458000  | 7. 13357200  |
| C | -2. 13637000 | 1. 89918200  | 7. 20970900  |
| C | -0. 29767900 | 3. 04843700  | 8. 28735000  |
| C | -2. 79557100 | 1. 82392300  | 8. 42915100  |
| H | -2. 57703800 | 1. 49920100  | 6. 30275500  |
| C | -0. 96261700 | 2. 96856400  | 9. 50463600  |
| H | 0. 68307000  | 3. 51384200  | 8. 23680100  |
| C | -2. 21158600 | 2. 35625800  | 9. 57760800  |
| H | -3. 77018600 | 1. 35029400  | 8. 48541200  |
| H | -0. 50426500 | 3. 37996800  | 10. 39776800 |

|   |              |             |              |
|---|--------------|-------------|--------------|
| H | -2. 72951700 | 2. 29378800 | 10. 52932300 |
| C | 2. 80658800  | 4. 76436700 | 2. 75488300  |
| C | 3. 40298000  | 5. 37774000 | 3. 86501300  |
| C | 3. 04701100  | 5. 31224500 | 1. 48346400  |
| C | 4. 20074600  | 6. 50636400 | 3. 70646100  |
| H | 3. 27209700  | 4. 95951300 | 4. 85762800  |
| C | 3. 84358900  | 6. 43645000 | 1. 32611700  |
| H | 2. 60168300  | 4. 83150100 | 0. 61532300  |
| C | 4. 42371400  | 7. 04122800 | 2. 44119800  |
| H | 4. 65642900  | 6. 96550100 | 4. 57776800  |
| H | 4. 01345400  | 6. 84379000 | 0. 33428500  |
| H | 5. 04825400  | 7. 92070800 | 2. 32312000  |

**TS3(RS)**

|   |              |              |              |
|---|--------------|--------------|--------------|
| O | -1. 16987800 | 0. 56983100  | -2. 09893200 |
| N | 1. 65054900  | 1. 04512700  | 1. 52622400  |
| N | 0. 72788200  | 0. 96412200  | 2. 55169900  |
| N | -0. 06260900 | 0. 08407900  | 0. 67969600  |
| C | 3. 80338400  | 1. 05512400  | 2. 61515600  |
| H | 3. 50601500  | 0. 12408700  | 3. 08427700  |
| C | 5. 06196800  | 1. 60085200  | 2. 82562200  |
| H | 5. 76438500  | 1. 10741800  | 3. 48910600  |
| C | 5. 41050900  | 2. 77883200  | 2. 16809000  |
| H | 6. 39669700  | 3. 20960600  | 2. 30734200  |
| C | 4. 49047400  | 3. 41623500  | 1. 34566000  |
| H | 4. 76870700  | 4. 34739800  | 0. 86051700  |
| C | 3. 20518200  | 2. 90327200  | 1. 13105100  |
| C | 2. 90414600  | 1. 68931300  | 1. 75831800  |
| C | 1. 21922400  | 0. 44040400  | 0. 38256600  |
| C | -0. 28187700 | 0. 37003200  | 2. 00388200  |
| C | -1. 57749200 | -0. 19947000 | 2. 47855700  |
| H | -2. 30210200 | 0. 58834900  | 2. 69458600  |
| H | -1. 42421200 | -0. 77954500 | 3. 39269100  |
| C | -1. 97468200 | -1. 10256800 | 1. 27932200  |
| H | -3. 04805100 | -1. 11736900 | 1. 08818100  |
| H | -1. 66095500 | -2. 12712200 | 1. 48577200  |
| C | -1. 17291900 | -0. 63213300 | 0. 03630500  |
| H | -0. 75645400 | -1. 49303400 | -0. 48869300 |
| C | -1. 96070900 | 0. 25053500  | -0. 99307700 |
| C | -3. 13453600 | -0. 59716000 | -1. 52193600 |
| C | -4. 43912000 | -0. 12588400 | -1. 62803400 |
| C | -2. 84520200 | -1. 87078400 | -2. 03240200 |
| C | -5. 43948100 | -0. 92161300 | -2. 18795300 |
| H | -4. 69791200 | 0. 87637700  | -1. 30531900 |

|   |             |             |             |
|---|-------------|-------------|-------------|
| C | -3.84961000 | -2.65518600 | -2.58002700 |
| H | -1.82794200 | -2.25425500 | -2.03498200 |
| C | -5.16130100 | -2.19278500 | -2.65975000 |
| C | -2.40072800 | 1.56495600  | -0.33398500 |
| C | -3.37978800 | 1.63960700  | 0.65563300  |
| C | -1.76755100 | 2.74858800  | -0.72433100 |
| C | -3.68143300 | 2.85292300  | 1.27165700  |
| H | -3.93272600 | 0.75609600  | 0.95979000  |
| C | -2.09977400 | 3.95747600  | -0.12627000 |
| H | -1.03044500 | 2.70369800  | -1.51722400 |
| C | -3.04745900 | 4.02491900  | 0.89084100  |
| H | -5.93821300 | -2.80428700 | -3.10436900 |
| H | -3.29091900 | 4.96828200  | 1.36693700  |
| H | 1.22276900  | -1.48974100 | -1.79097900 |
| C | -3.53606200 | -4.04699200 | -3.05716700 |
| C | -6.84180900 | -0.38231200 | -2.23491000 |
| C | -1.49327200 | 5.23727400  | -0.62655800 |
| C | -4.67848300 | 2.84221000  | 2.39421000  |
| F | -4.18097500 | 2.19769300  | 3.46710600  |
| F | -5.80145400 | 2.19937400  | 2.04874200  |
| F | -5.01192200 | 4.07515400  | 2.78772400  |
| F | -0.36577600 | 5.01919100  | -1.32264000 |
| F | -1.19060200 | 6.06709900  | 0.38455800  |
| F | -2.33576600 | 5.89589100  | -1.43167000 |
| F | -2.26490500 | -4.16530800 | -3.45112900 |
| F | -3.73760600 | -4.94890400 | -2.08345400 |
| F | -4.32267700 | -4.39922600 | -4.08458300 |
| F | -7.42594700 | -0.44079400 | -1.02786400 |
| F | -7.61318000 | -1.06953200 | -3.08597700 |
| F | -6.85986600 | 0.90379800  | -2.61130200 |
| C | 2.22172700  | 3.67870400  | 0.27307300  |
| C | 2.71638100  | 3.80455700  | -1.17279000 |
| C | 1.97289200  | 5.05937800  | 0.89585900  |
| H | 1.26612300  | 3.14100300  | 0.25968300  |
| H | 2.87729600  | 2.82131300  | -1.62346100 |
| H | 1.98067900  | 4.34550100  | -1.77271200 |
| H | 3.65831400  | 4.36179100  | -1.21455600 |
| H | 1.57531800  | 4.96726300  | 1.91023800  |
| H | 2.90155100  | 5.63629800  | 0.94806800  |
| H | 1.26096000  | 5.62525900  | 0.29387000  |
| C | 3.98243100  | -0.53168600 | -1.92790700 |
| C | 3.31360200  | 0.19334700  | -0.95516300 |
| H | 3.36924000  | -0.97731500 | -2.70911500 |
| C | 1.92863600  | 0.10137700  | -0.80397100 |

|   |             |             |             |
|---|-------------|-------------|-------------|
| H | 3.90627400  | 0.70310300  | -0.20014000 |
| C | 5.40880600  | -0.23641500 | -2.29489100 |
| C | 5.51143200  | 0.89720500  | -3.32494500 |
| H | 5.88900400  | -1.13462500 | -2.70513300 |
| H | 5.98087000  | 0.03728500  | -1.39893100 |
| C | 6.95492400  | 1.16138600  | -3.74389900 |
| H | 4.90583700  | 0.64557300  | -4.20363400 |
| H | 5.06958900  | 1.80485400  | -2.89591500 |
| H | 7.02014100  | 1.97644100  | -4.46922400 |
| H | 7.56856300  | 1.42981100  | -2.87820800 |
| H | 7.39789500  | 0.26991100  | -4.19881900 |
| O | 1.17643200  | -0.43522600 | -1.80891700 |
| H | -0.26874900 | 0.16009300  | -2.04348000 |
| C | 1.34750400  | -2.71390900 | 1.96515600  |
| C | 3.00878700  | -2.61028700 | 0.15986400  |
| C | 1.65007300  | -2.81621000 | -0.23799300 |
| N | 0.75677700  | -2.91267900 | 0.82833200  |
| O | 1.25084000  | -2.84275600 | -1.43993300 |
| S | 3.07211800  | -2.43189100 | 1.90120900  |
| C | 4.07419300  | -2.52327100 | -0.73546400 |
| H | 3.86793600  | -2.99060300 | -1.69598500 |
| C | 0.62738700  | -2.72232500 | 3.24730000  |
| C | -0.50733700 | -3.53371700 | 3.37579300  |
| C | 1.01804900  | -1.90519300 | 4.31267600  |
| C | -1.24418700 | -3.51906900 | 4.55293900  |
| H | -0.78971600 | -4.16784000 | 2.54118000  |
| C | 0.27622300  | -1.89403700 | 5.49028500  |
| H | 1.87697100  | -1.24891500 | 4.20739300  |
| C | -0.85531800 | -2.69692000 | 5.61137800  |
| H | -2.12016400 | -4.15234200 | 4.64835600  |
| H | 0.57586500  | -1.24787600 | 6.30845200  |
| H | -1.43400500 | -2.68423600 | 6.52920700  |
| C | 5.48192300  | -2.48544600 | -0.30752000 |
| C | 5.91954000  | -1.63873200 | 0.72166100  |
| C | 6.42820000  | -3.28113700 | -0.96443600 |
| C | 7.25725600  | -1.61029700 | 1.09597600  |
| H | 5.21426500  | -0.96019100 | 1.19614100  |
| C | 7.76616400  | -3.25640100 | -0.58507700 |
| H | 6.10405500  | -3.92941200 | -1.77396200 |
| C | 8.18545500  | -2.42359700 | 0.44890800  |
| H | 7.57894300  | -0.93966100 | 1.88692700  |
| H | 8.48323400  | -3.88723200 | -1.10058100 |
| H | 9.23000700  | -2.40063300 | 0.74187700  |



**TS3(SR)**

|   |             |             |             |
|---|-------------|-------------|-------------|
| O | 2.28300000  | 1.83570300  | -0.41116900 |
| N | -0.81448100 | -0.79165800 | 2.45281000  |
| N | 0.06154000  | -1.57108700 | 3.16180800  |
| N | 1.12380200  | -0.02630800 | 1.99446000  |
| C | -3.15617200 | -0.55989100 | 3.10878600  |
| H | -2.88105600 | 0.31219400  | 3.69138700  |
| C | -4.45961900 | -1.03847600 | 3.11346900  |
| H | -5.22851400 | -0.51310800 | 3.66894400  |
| C | -4.75756200 | -2.20794000 | 2.41909100  |
| H | -5.77171000 | -2.59682800 | 2.40941000  |
| C | -3.76418100 | -2.87850800 | 1.71688000  |
| H | -4.02245100 | -3.78543600 | 1.18004500  |
| C | -2.44880300 | -2.41154200 | 1.66626100  |
| C | -2.18423300 | -1.23718600 | 2.38004000  |
| C | -0.19413500 | 0.17368200  | 1.75424700  |
| C | 1.22155000  | -1.07939900 | 2.86136300  |
| C | 2.62279700  | -1.34462700 | 3.27942600  |
| H | 2.94650900  | -2.32456400 | 2.91890300  |
| H | 2.70817300  | -1.34892500 | 4.36721900  |
| C | 3.38989900  | -0.16428700 | 2.62765700  |
| H | 4.27060600  | -0.51297100 | 2.08960400  |
| H | 3.74549500  | 0.52321600  | 3.39663200  |
| C | 2.42152800  | 0.61007700  | 1.67145300  |
| H | 2.35685600  | 1.66348400  | 1.95628500  |
| C | 2.78988800  | 0.65791200  | 0.12514600  |
| C | 4.31559000  | 0.80841900  | 0.02294500  |
| C | 5.18018700  | -0.19601600 | -0.40358300 |
| C | 4.85407700  | 2.04302700  | 0.39592400  |
| C | 6.55672900  | 0.02689800  | -0.43001600 |
| H | 4.80051900  | -1.15880800 | -0.72913600 |
| C | 6.22751500  | 2.24780200  | 0.37717100  |
| H | 4.18620200  | 2.85295600  | 0.67085900  |
| C | 7.09623000  | 1.24177700  | -0.03328100 |
| C | 2.26422300  | -0.58306100 | -0.59769600 |
| C | 2.47509800  | -1.86174600 | -0.09024800 |
| C | 1.52386700  | -0.44489600 | -1.77358800 |
| C | 1.94774200  | -2.97992600 | -0.73184800 |
| H | 3.06322700  | -2.01112100 | 0.81014100  |
| C | 0.99875300  | -1.56422800 | -2.40489800 |
| H | 1.34391500  | 0.54381300  | -2.17808800 |
| C | 1.20603500  | -2.84301600 | -1.89520500 |
| H | 8.16730200  | 1.40607500  | -0.05200400 |
| H | 0.78342800  | -3.70972600 | -2.39213800 |

|   |              |              |              |
|---|--------------|--------------|--------------|
| H | 1. 27363800  | 1. 78545300  | -0. 35629600 |
| C | 6. 76729200  | 3. 56644600  | 0. 85872200  |
| C | 7. 45251600  | -1. 06318000 | -0. 95071800 |
| C | 0. 21152800  | -1. 43330600 | -3. 68256200 |
| C | 2. 23006600  | -4. 33027500 | -0. 14330800 |
| F | 1. 34822100  | -5. 25398000 | -0. 54905700 |
| F | 2. 18056200  | -4. 28736200 | 1. 20396900  |
| F | 3. 45152700  | -4. 77245000 | -0. 46781600 |
| F | -0. 07150700 | -0. 16377300 | -3. 97521800 |
| F | -0. 92945400 | -2. 12653300 | -3. 62347500 |
| F | 0. 91428700  | -1. 93631200 | -4. 71498000 |
| F | 6. 01638800  | 4. 58849100  | 0. 43150900  |
| F | 6. 77604100  | 3. 62199900  | 2. 20075000  |
| F | 8. 02298700  | 3. 77390800  | 0. 44439800  |
| F | 7. 05753300  | -2. 26798500 | -0. 51168900 |
| F | 8. 72350100  | -0. 88621800 | -0. 56846700 |
| F | 7. 43814400  | -1. 11060700 | -2. 28899400 |
| C | -1. 37584300 | -3. 21600400 | 0. 95218900  |
| C | -1. 78821700 | -3. 64016300 | -0. 46005200 |
| C | -1. 02215200 | -4. 44145400 | 1. 80918900  |
| H | -0. 47468400 | -2. 59550900 | 0. 85285500  |
| H | -1. 95399500 | -2. 77602100 | -1. 10691500 |
| H | -0. 99950400 | -4. 26985100 | -0. 88204400 |
| H | -2. 70327900 | -4. 24124200 | -0. 44441400 |
| H | -0. 67903500 | -4. 14293400 | 2. 80285200  |
| H | -1. 90357400 | -5. 08083400 | 1. 92693400  |
| H | -0. 23856700 | -5. 02935500 | 1. 32639200  |
| C | -2. 16935300 | 3. 24156900  | 0. 71398400  |
| C | -1. 74177000 | 2. 05598100  | 1. 42232600  |
| H | -1. 35103900 | 3. 79708300  | 0. 25195500  |
| C | -0. 75321600 | 1. 26329600  | 0. 92476200  |
| H | -2. 23154400 | 1. 78787100  | 2. 35224500  |
| C | -3. 23327500 | 4. 08820500  | 1. 35902800  |
| C | -2. 75198600 | 4. 77428900  | 2. 64503000  |
| H | -4. 11052000 | 3. 46385100  | 1. 58683400  |
| H | -3. 56968100 | 4. 85880000  | 0. 65618200  |
| C | -3. 83391300 | 5. 65122800  | 3. 26899400  |
| H | -2. 42388400 | 4. 01711500  | 3. 36830800  |
| H | -1. 86738200 | 5. 37987800  | 2. 41339800  |
| H | -3. 48137800 | 6. 13615400  | 4. 18310200  |
| H | -4. 14916100 | 6. 43361400  | 2. 57196100  |
| H | -4. 71867100 | 5. 05850000  | 3. 52205400  |
| O | -0. 17560000 | 1. 42841800  | -0. 23875100 |
| H | -1. 07528300 | 0. 51777100  | -1. 20806000 |

|   |             |             |             |
|---|-------------|-------------|-------------|
| C | -4.96306500 | -0.63838000 | -0.65223200 |
| C | -3.55897200 | 1.33529400  | -1.05719200 |
| C | -2.96318700 | 0.09309800  | -1.22826900 |
| N | -3.76804100 | -0.99162500 | -1.02605800 |
| O | -1.70461400 | -0.13647900 | -1.63058400 |
| S | -5.18772400 | 1.08175700  | -0.50298900 |
| C | -2.88715900 | 2.60645500  | -1.21594900 |
| H | -1.89333800 | 2.45141200  | -1.63041400 |
| C | -6.05147400 | -1.59155000 | -0.40531200 |
| C | -5.88111700 | -2.92528400 | -0.79604800 |
| C | -7.23020900 | -1.21419000 | 0.24490000  |
| C | -6.86527900 | -3.86525600 | -0.51936900 |
| H | -4.96239600 | -3.19923200 | -1.30551800 |
| C | -8.21628400 | -2.15717400 | 0.51441000  |
| H | -7.37010500 | -0.18352300 | 0.56078400  |
| C | -8.03474900 | -3.48664500 | 0.14007100  |
| H | -6.72404400 | -4.89759400 | -0.82394000 |
| H | -9.12568500 | -1.85428900 | 1.02346500  |
| H | -8.80304800 | -4.22276800 | 0.35333000  |
| C | -3.50248300 | 3.85210300  | -1.71685400 |
| C | -4.87066700 | 4.15053900  | -1.66899600 |
| C | -2.63695600 | 4.83991400  | -2.21762100 |
| C | -5.34860000 | 5.38463700  | -2.10241900 |
| H | -5.58198600 | 3.42187200  | -1.29889500 |
| C | -3.11250100 | 6.07122100  | -2.64579700 |
| H | -1.57219400 | 4.62525600  | -2.26760700 |
| C | -4.47669600 | 6.35224600  | -2.59000000 |
| H | -6.41428300 | 5.58695400  | -2.05796600 |
| H | -2.41802600 | 6.81127300  | -3.03114600 |
| H | -4.85405300 | 7.31189700  | -2.92757200 |

### TS3(SS)

|   |             |             |             |
|---|-------------|-------------|-------------|
| O | 1.93581600  | 0.04451000  | 2.03502300  |
| N | -0.73604000 | -3.83523400 | 0.10003600  |
| N | 0.29070600  | -4.65020800 | -0.33845300 |
| N | 1.07821000  | -2.69468100 | 0.38986800  |
| C | -2.85926200 | -4.94834200 | 0.49607100  |
| H | -2.48340100 | -5.21891400 | 1.47784000  |
| C | -4.10870500 | -5.36857200 | 0.06120700  |
| H | -4.73571800 | -5.97310500 | 0.70750300  |
| C | -4.53732600 | -5.01622500 | -1.21785700 |
| H | -5.50788300 | -5.34497300 | -1.57624700 |
| C | -3.72563000 | -4.24666200 | -2.04148700 |
| H | -4.07598400 | -3.97993400 | -3.03431000 |

|   |             |             |             |
|---|-------------|-------------|-------------|
| C | -2.45641800 | -3.81498600 | -1.63366100 |
| C | -2.05746900 | -4.17534400 | -0.34208600 |
| C | -0.28505800 | -2.63399900 | 0.58138800  |
| C | 1.34671100  | -3.94330900 | -0.13456000 |
| C | 2.80781000  | -4.21927800 | -0.21217000 |
| H | 3.10702300  | -4.61887200 | -1.18185400 |
| H | 3.07467500  | -4.95325500 | 0.55414400  |
| C | 3.40203000  | -2.83390000 | 0.09151600  |
| H | 3.62547500  | -2.30694800 | -0.83949700 |
| H | 4.33139600  | -2.88891700 | 0.65799900  |
| C | 2.32614700  | -2.05182500 | 0.89195900  |
| H | 2.40373600  | -2.29857200 | 1.95827100  |
| C | 2.48739000  | -0.49270600 | 0.86462300  |
| C | 3.99737000  | -0.22397900 | 0.98499000  |
| C | 4.81067500  | 0.01903600  | -0.12057400 |
| C | 4.57549100  | -0.25355500 | 2.25467800  |
| C | 6.17972300  | 0.20881900  | 0.04408000  |
| H | 4.38238100  | 0.08718400  | -1.11661000 |
| C | 5.94542600  | -0.06472200 | 2.40454500  |
| H | 3.94168000  | -0.39396200 | 3.12386500  |
| C | 6.76264900  | 0.16503300  | 1.30418300  |
| C | 1.93295000  | 0.20618400  | -0.37839800 |
| C | 1.68987900  | -0.42727300 | -1.59473000 |
| C | 1.72961600  | 1.58566100  | -0.28729600 |
| C | 1.26016100  | 0.31217600  | -2.69529100 |
| H | 1.82279300  | -1.49633000 | -1.71534000 |
| C | 1.28866700  | 2.30592900  | -1.38749700 |
| H | 1.90563800  | 2.08330100  | 0.66088300  |
| C | 1.05011000  | 1.67941900  | -2.60472000 |
| H | 7.82682100  | 0.32818400  | 1.42924500  |
| H | 0.69682000  | 2.24559600  | -3.45950800 |
| H | 0.95692000  | -0.02776400 | 1.92673700  |
| C | 6.53991600  | -0.15689900 | 3.78280100  |
| C | 7.03352400  | 0.42162300  | -1.17499600 |
| C | 1.15187800  | 3.79941700  | -1.29315900 |
| C | 1.11998200  | -0.36550100 | -4.02634700 |
| F | 0.12108100  | 0.14871200  | -4.75525700 |
| F | 0.88585500  | -1.68583800 | -3.89138500 |
| F | 2.23768300  | -0.24763300 | -4.75820000 |
| F | 0.82865900  | 4.20252600  | -0.05977600 |
| F | 0.22880300  | 4.27114900  | -2.14171200 |
| F | 2.31278600  | 4.40308900  | -1.60850600 |
| F | 5.77058800  | 0.45474500  | 4.69131300  |
| F | 6.66205600  | -1.43645400 | 4.17156000  |

|   |             |             |             |
|---|-------------|-------------|-------------|
| F | 7.75974800  | 0.39278600  | 3.83784500  |
| F | 7.29849800  | -0.74229500 | -1.79061800 |
| F | 8.20830500  | 0.98433700  | -0.86790300 |
| F | 6.42233400  | 1.20546700  | -2.07209900 |
| C | -1.57390700 | -3.04023200 | -2.59583900 |
| C | -2.14161600 | -1.64205100 | -2.87312800 |
| C | -1.38376000 | -3.83635800 | -3.89337500 |
| H | -0.58364700 | -2.91416800 | -2.14314200 |
| H | -2.02725800 | -0.98194300 | -2.00799200 |
| H | -1.61069200 | -1.17999400 | -3.70870800 |
| H | -3.20326100 | -1.69378500 | -3.13876700 |
| H | -0.99770500 | -4.83838300 | -3.68639500 |
| H | -2.32862200 | -3.93954500 | -4.43616800 |
| H | -0.68016700 | -3.31624600 | -4.54617800 |
| C | -3.02810600 | -0.67736900 | 2.24301900  |
| C | -2.30192000 | -1.74623500 | 1.73390900  |
| H | -2.49379700 | 0.26373200  | 2.34165500  |
| C | -1.03558000 | -1.58959500 | 1.15937500  |
| H | -2.75853500 | -2.73327400 | 1.73848300  |
| C | -4.18020300 | -0.88692200 | 3.18421200  |
| C | -3.72011700 | -1.08238000 | 4.63506200  |
| H | -4.77261400 | -1.75738600 | 2.86915700  |
| H | -4.85735100 | -0.02305000 | 3.14098800  |
| C | -4.89374300 | -1.24261900 | 5.59709900  |
| H | -3.06767300 | -1.96248800 | 4.68440700  |
| H | -3.10398100 | -0.22661400 | 4.93547900  |
| H | -4.55317400 | -1.39158300 | 6.62510100  |
| H | -5.53518200 | -0.35597400 | 5.58076900  |
| H | -5.51156100 | -2.10225900 | 5.31858300  |
| O | -0.43818800 | -0.36731900 | 1.19042700  |
| H | -0.80647500 | 0.21966100  | 0.39267300  |
| C | -3.11152200 | 3.77881900  | 0.04972000  |
| C | -3.57666800 | 1.36899800  | 0.15621800  |
| C | -2.27948100 | 1.75181200  | -0.32249200 |
| N | -2.08406000 | 3.12332500  | -0.39005700 |
| O | -1.36934600 | 0.93433900  | -0.64888700 |
| S | -4.47397800 | 2.80265300  | 0.59078900  |
| C | -3.92839000 | 0.02427700  | 0.26959100  |
| H | -3.22166900 | -0.61359400 | -0.25319800 |
| C | -3.17911800 | 5.24641700  | 0.10802400  |
| C | -2.06563700 | 5.98930300  | -0.30274100 |
| C | -4.32145700 | 5.91242500  | 0.56490200  |
| C | -2.10118800 | 7.37668400  | -0.25418700 |
| H | -1.18833300 | 5.45959400  | -0.65302700 |

|   |             |             |             |
|---|-------------|-------------|-------------|
| C | -4.35092300 | 7.30033100  | 0.61130300  |
| H | -5.19425800 | 5.34863600  | 0.88271300  |
| C | -3.24089900 | 8.03587700  | 0.20218500  |
| H | -1.23434100 | 7.94682500  | -0.57210000 |
| H | -5.24150700 | 7.80849400  | 0.96618700  |
| H | -3.26485800 | 9.12029000  | 0.23934200  |
| C | -5.26601400 | -0.56412700 | 0.41586700  |
| C | -6.40099900 | 0.13410600  | 0.84703700  |
| C | -5.39384500 | -1.93457300 | 0.14005400  |
| C | -7.62339500 | -0.51710900 | 0.98497200  |
| H | -6.34408500 | 1.19038700  | 1.08389000  |
| C | -6.61174400 | -2.58337400 | 0.27935300  |
| H | -4.51200600 | -2.48845400 | -0.17405000 |
| C | -7.73578400 | -1.87471700 | 0.70287500  |
| H | -8.49172900 | 0.04260200  | 1.31749000  |
| H | -6.68235500 | -3.64441000 | 0.06112000  |
| H | -8.69073700 | -2.37787200 | 0.81496400  |

**M3(RR)**

|   |             |             |             |
|---|-------------|-------------|-------------|
| O | 0.24426600  | -0.87331600 | 2.00187600  |
| N | 1.52873400  | 2.35486300  | -1.51853200 |
| N | 0.34692400  | 2.45156500  | -2.19826500 |
| N | 0.08848000  | 1.41310300  | -0.25669300 |
| C | 2.71595300  | 4.33569300  | -2.18818500 |
| H | 1.82070500  | 4.88752200  | -1.92011400 |
| C | 3.85292700  | 4.97995000  | -2.65884200 |
| H | 3.86072300  | 6.05839400  | -2.76969000 |
| C | 4.97743200  | 4.22365500  | -2.97157600 |
| H | 5.87865100  | 4.71213800  | -3.32753900 |
| C | 4.95712500  | 2.83768300  | -2.83958000 |
| H | 5.84550200  | 2.27340500  | -3.09827400 |
| C | 3.82646300  | 2.15377900  | -2.38225300 |
| C | 2.72622600  | 2.95306700  | -2.04885300 |
| C | 1.38815800  | 1.76181700  | -0.32822100 |
| C | -0.50389000 | 1.87263700  | -1.40419000 |
| C | -1.98070800 | 1.70254200  | -1.37774300 |
| H | -2.28212700 | 0.89043200  | -2.04392000 |
| H | -2.48203300 | 2.61343100  | -1.70727000 |
| C | -2.22622600 | 1.39511300  | 0.12221000  |
| H | -3.01338000 | 0.65555500  | 0.26515800  |
| H | -2.54407800 | 2.30373600  | 0.64033200  |
| C | -0.88183300 | 0.92512300  | 0.76296900  |
| H | -0.69419800 | 1.47616200  | 1.68981500  |
| C | -0.78366400 | -0.60837200 | 1.10718000  |

|   |             |             |             |
|---|-------------|-------------|-------------|
| C | -2.09182400 | -1.02303500 | 1.81164100  |
| C | -2.86424700 | -2.12108900 | 1.44959800  |
| C | -2.43052300 | -0.31580500 | 2.97526500  |
| C | -3.97876600 | -2.48269700 | 2.20982900  |
| H | -2.60169700 | -2.73488900 | 0.59486600  |
| C | -3.54158100 | -0.68692300 | 3.71853600  |
| H | -1.80340500 | 0.50695100  | 3.32322100  |
| C | -4.33305900 | -1.77072400 | 3.34237500  |
| C | -0.48364300 | -1.37224300 | -0.17931400 |
| C | -1.41018800 | -1.49518700 | -1.21300700 |
| C | 0.80462200  | -1.87709600 | -0.36931700 |
| C | -1.05291300 | -2.09561700 | -2.41830200 |
| H | -2.42878800 | -1.13524100 | -1.09135400 |
| C | 1.13654300  | -2.50356200 | -1.56582500 |
| H | 1.53403600  | -1.75292700 | 0.42402600  |
| C | 0.22079000  | -2.61294200 | -2.60797700 |
| H | -5.18871800 | -2.06657600 | 3.93859900  |
| H | 0.49349500  | -3.08594900 | -3.54437100 |
| H | 0.46209300  | -0.11632800 | 2.61827200  |
| C | -3.92616200 | 0.10027300  | 4.94008600  |
| C | -4.81508400 | -3.64512800 | 1.75302200  |
| C | 2.50255300  | -3.11769400 | -1.69713100 |
| C | -2.08705300 | -2.15024100 | -3.50516000 |
| F | -2.46666300 | -0.90735400 | -3.86682300 |
| F | -3.19554400 | -2.78078100 | -3.09654900 |
| F | -1.64018900 | -2.76805100 | -4.60128900 |
| F | 2.55816700  | -4.32673800 | -1.12923100 |
| F | 3.43739300  | -2.35767600 | -1.10550400 |
| F | 2.86250300  | -3.26869400 | -2.98396000 |
| F | -4.82015200 | 1.06202600  | 4.63367400  |
| F | -4.49863900 | -0.67494700 | 5.86869800  |
| F | -2.87297500 | 0.70683900  | 5.49548000  |
| F | -5.62057300 | -3.29308800 | 0.73806600  |
| F | -5.59389000 | -4.11560000 | 2.73471500  |
| F | -4.05261400 | -4.65440300 | 1.31157800  |
| C | 3.76717200  | 0.63515200  | -2.31899900 |
| C | 5.14106600  | -0.02297000 | -2.44069000 |
| C | 2.83577500  | 0.12090000  | -3.42947300 |
| H | 3.35314200  | 0.33375900  | -1.34743400 |
| H | 5.83967600  | 0.35670900  | -1.68894700 |
| H | 5.03650900  | -1.09908900 | -2.29583700 |
| H | 5.57325600  | 0.13913600  | -3.43376000 |
| H | 1.81072200  | 0.48715900  | -3.31687900 |
| H | 3.20401600  | 0.45129200  | -4.40606200 |

|   |              |              |              |
|---|--------------|--------------|--------------|
| H | 2. 81324900  | -0. 97074500 | -3. 42849400 |
| C | 3. 94692900  | 2. 70398600  | 2. 34333700  |
| C | 3. 04010900  | 2. 73861300  | 1. 15253600  |
| H | 4. 04695400  | 1. 66115400  | 2. 66327500  |
| C | 2. 41557800  | 1. 63736300  | 0. 71426200  |
| H | 2. 84460900  | 3. 69840300  | 0. 67548300  |
| C | 5. 33598700  | 3. 23819200  | 1. 96708900  |
| C | 6. 00586800  | 2. 41343100  | 0. 86844500  |
| H | 5. 96896600  | 3. 25232200  | 2. 86270500  |
| H | 5. 23897300  | 4. 28209600  | 1. 63125600  |
| C | 7. 35924100  | 2. 97896000  | 0. 44989800  |
| H | 6. 11817500  | 1. 37871000  | 1. 21582100  |
| H | 5. 34300400  | 2. 37459900  | -0. 00569300 |
| H | 7. 82321200  | 2. 36886800  | -0. 33060000 |
| H | 7. 24995900  | 3. 99586700  | 0. 05844000  |
| H | 8. 05026800  | 3. 02053300  | 1. 29749900  |
| O | 2. 53868700  | 0. 40891400  | 1. 24084400  |
| H | 2. 21497800  | 0. 53900400  | 2. 21538100  |
| C | -0. 58503100 | 3. 80879900  | 3. 56710800  |
| C | 1. 82680200  | 3. 36550400  | 3. 62303900  |
| C | 1. 02303700  | 2. 24288200  | 3. 50360300  |
| N | -0. 33997600 | 2. 53015700  | 3. 48593000  |
| O | 1. 40747900  | 0. 99804600  | 3. 37125800  |
| S | 0. 83753900  | 4. 78547400  | 3. 71062000  |
| C | 3. 32678000  | 3. 50909800  | 3. 53429400  |
| H | 3. 53340100  | 4. 56741800  | 3. 32011300  |
| C | -1. 93560500 | 4. 39115800  | 3. 52150200  |
| C | -3. 04573000 | 3. 56497500  | 3. 72885200  |
| C | -2. 13756200 | 5. 74909600  | 3. 25227000  |
| C | -4. 33198200 | 4. 08621900  | 3. 66357500  |
| H | -2. 87893900 | 2. 52208300  | 3. 96711900  |
| C | -3. 42518500 | 6. 26894500  | 3. 19344500  |
| H | -1. 28454000 | 6. 39926300  | 3. 07684300  |
| C | -4. 52619900 | 5. 43969700  | 3. 39466800  |
| H | -5. 17944200 | 3. 43226200  | 3. 83965600  |
| H | -3. 56972400 | 7. 32417500  | 2. 98507700  |
| H | -5. 53056100 | 5. 84807600  | 3. 34765100  |
| C | 4. 04305700  | 3. 16473000  | 4. 82933100  |
| C | 3. 76876900  | 1. 96166500  | 5. 48868200  |
| C | 4. 99896200  | 4. 02898400  | 5. 36273500  |
| C | 4. 44692000  | 1. 63785800  | 6. 65878000  |
| H | 3. 01676500  | 1. 29099300  | 5. 07714200  |
| C | 5. 67792300  | 3. 70380300  | 6. 53519400  |
| H | 5. 21036700  | 4. 96838900  | 4. 85664200  |



|   |             |             |             |
|---|-------------|-------------|-------------|
| C | 5. 40301200 | 2. 50577200 | 7. 18537300 |
| H | 4. 22604600 | 0. 70374200 | 7. 16590800 |
| H | 6. 41602600 | 4. 38911900 | 6. 94027200 |
| H | 5. 92788900 | 2. 24917400 | 8. 10011200 |

**M3(RS)**

|   |              |              |              |
|---|--------------|--------------|--------------|
| O | -0. 64120200 | -0. 43617700 | -1. 53593500 |
| N | 1. 48826600  | 2. 23130000  | 1. 76746400  |
| N | 0. 50332200  | 2. 38145700  | 2. 70823500  |
| N | -0. 00616400 | 0. 81829900  | 1. 23493900  |
| C | 3. 39109700  | 2. 80364700  | 3. 11116200  |
| H | 2. 95643600  | 2. 16387800  | 3. 87199200  |
| C | 4. 60173200  | 3. 44917600  | 3. 31425500  |
| H | 5. 13468600  | 3. 32163400  | 4. 24983200  |
| C | 5. 12226800  | 4. 25033100  | 2. 30035500  |
| H | 6. 07387100  | 4. 75302800  | 2. 43889500  |
| C | 4. 42538100  | 4. 41003700  | 1. 10943100  |
| H | 4. 84135800  | 5. 04492900  | 0. 33273200  |
| C | 3. 19671500  | 3. 78077000  | 0. 87194200  |
| C | 2. 71595500  | 2. 97096800  | 1. 90373200  |
| C | 1. 21165500  | 1. 26419200  | 0. 88008100  |
| C | -0. 39072000 | 1. 51034600  | 2. 35089000  |
| C | -1. 68865300 | 1. 01312800  | 2. 88693000  |
| H | -2. 48241900 | 1. 73787600  | 2. 68805700  |
| H | -1. 63564100 | 0. 85772300  | 3. 96520000  |
| C | -1. 86068900 | -0. 31590200 | 2. 10283600  |
| H | -2. 89594800 | -0. 49595100 | 1. 81154400  |
| H | -1. 55671300 | -1. 15774200 | 2. 73105400  |
| C | -0. 91860700 | -0. 28120500 | 0. 86054800  |
| H | -0. 32538000 | -1. 19602800 | 0. 79495200  |
| C | -1. 56573800 | -0. 08316300 | -0. 55900900 |
| C | -2. 72228600 | -1. 08459300 | -0. 70078400 |
| C | -3. 97541100 | -0. 74426900 | -1. 20327100 |
| C | -2. 47180300 | -2. 42346900 | -0. 37869800 |
| C | -4. 96966700 | -1. 71267500 | -1. 33809700 |
| H | -4. 19844000 | 0. 27441700  | -1. 50070000 |
| C | -3. 47747700 | -3. 37403500 | -0. 50316400 |
| H | -1. 48075400 | -2. 74042000 | -0. 05457400 |
| C | -4. 73922900 | -3. 03199500 | -0. 97828900 |
| C | -2. 00514300 | 1. 37756200  | -0. 69470200 |
| C | -3. 04992900 | 1. 89865100  | 0. 06815500  |
| C | -1. 30121200 | 2. 23999800  | -1. 53801200 |
| C | -3. 36731300 | 3. 25298500  | 0. 01352400  |
| H | -3. 64703100 | 1. 25025000  | 0. 70409700  |

|   |             |             |             |
|---|-------------|-------------|-------------|
| C | -1.64736700 | 3.58662300  | -1.60328800 |
| H | -0.47088200 | 1.86255500  | -2.12607100 |
| C | -2.67226900 | 4.11329200  | -0.82353400 |
| H | -5.51938400 | -3.77821700 | -1.07530600 |
| H | -2.92227800 | 5.16708800  | -0.86921300 |
| H | 0.23008300  | -1.98362600 | -2.00217700 |
| C | -3.19633200 | -4.78194100 | -0.05865800 |
| C | -6.29534900 | -1.31391800 | -1.92524600 |
| C | -0.94406600 | 4.47986300  | -2.58705400 |
| C | -4.46191100 | 3.74957300  | 0.91354600  |
| F | -4.10676700 | 3.62453000  | 2.20847900  |
| F | -5.58413400 | 3.03619000  | 0.75749300  |
| F | -4.75436800 | 5.03483700  | 0.70137800  |
| F | 0.31746100  | 4.07955900  | -2.80488900 |
| F | -0.89852000 | 5.74963900  | -2.15329600 |
| F | -1.56486900 | 4.49036900  | -3.77255400 |
| F | -1.95469200 | -5.16337900 | -0.38118200 |
| F | -3.29995300 | -4.89673000 | 1.28092000  |
| F | -4.05208100 | -5.65925200 | -0.59424000 |
| F | -6.65724900 | -0.08697000 | -1.52201400 |
| F | -7.26854400 | -2.16373200 | -1.57098000 |
| F | -6.25388100 | -1.29026700 | -3.26394100 |
| C | 2.46675200  | 4.02848900  | -0.43637000 |
| C | 3.31860900  | 3.60958700  | -1.63943100 |
| C | 2.06115200  | 5.50541100  | -0.53121700 |
| H | 1.55342100  | 3.42397200  | -0.46341600 |
| H | 3.60168500  | 2.55718200  | -1.56787400 |
| H | 2.74892000  | 3.74969900  | -2.56049700 |
| H | 4.22771000  | 4.21654200  | -1.70543800 |
| H | 1.41365400  | 5.79446100  | 0.30153400  |
| H | 2.94418200  | 6.15215800  | -0.51116200 |
| H | 1.52916700  | 5.69071100  | -1.46560100 |
| C | 4.34268600  | -0.21457800 | -0.75796600 |
| C | 3.32439700  | 0.42901900  | 0.14218400  |
| H | 4.54465400  | 0.45835200  | -1.60628700 |
| C | 2.07054800  | 0.76522800  | -0.23200600 |
| H | 3.59934900  | 0.57126300  | 1.18352300  |
| C | 5.66487500  | -0.37835600 | 0.00291500  |
| C | 6.25466000  | 0.97220600  | 0.41657000  |
| H | 6.39162600  | -0.91038300 | -0.61984900 |
| H | 5.50665500  | -0.99787900 | 0.89932100  |
| C | 7.55110200  | 0.83077100  | 1.20812500  |
| H | 6.43302200  | 1.56772000  | -0.48889300 |
| H | 5.52666200  | 1.54073700  | 1.00942200  |

|   |             |             |             |
|---|-------------|-------------|-------------|
| H | 7.95576900  | 1.80730800  | 1.48878200  |
| H | 7.38463600  | 0.26073500  | 2.12790300  |
| H | 8.31369000  | 0.30406900  | 0.62622400  |
| O | 1.51728300  | 0.69860000  | -1.40702000 |
| H | 0.28918000  | 0.08002500  | -1.45434100 |
| C | 1.46541100  | -3.12801700 | 1.30652600  |
| C | 2.87836700  | -2.31211600 | -0.52808400 |
| C | 1.57985000  | -2.61827300 | -0.83999800 |
| N | 0.79403500  | -3.07071600 | 0.18857400  |
| O | 1.06763200  | -2.48429600 | -2.07365900 |
| S | 3.13438600  | -2.67035300 | 1.14943400  |
| C | 3.78358200  | -1.52551200 | -1.42863100 |
| H | 3.09463700  | -1.17408000 | -2.20603600 |
| C | 0.83509100  | -3.48270100 | 2.58675400  |
| C | -0.40853500 | -4.12759800 | 2.56784600  |
| C | 1.41000300  | -3.13576400 | 3.81327600  |
| C | -1.07024200 | -4.40424200 | 3.75777400  |
| H | -0.82979000 | -4.42592700 | 1.61443000  |
| C | 0.74970200  | -3.42693800 | 5.00209700  |
| H | 2.36801400  | -2.62291800 | 3.83665000  |
| C | -0.49399400 | -4.05426400 | 4.97813500  |
| H | -2.03320300 | -4.90361800 | 3.72589100  |
| H | 1.20375600  | -3.15474500 | 5.94949200  |
| H | -1.00911600 | -4.27487600 | 5.90744400  |
| C | 4.88913300  | -2.30770900 | -2.11173700 |
| C | 5.42081200  | -3.48543600 | -1.58610800 |
| C | 5.43800800  | -1.79518400 | -3.29134700 |
| C | 6.48343300  | -4.12913500 | -2.21708200 |
| H | 4.99605800  | -3.91112000 | -0.68155500 |
| C | 6.49968500  | -2.43357800 | -3.92236300 |
| H | 5.02039700  | -0.88663200 | -3.71919800 |
| C | 7.02954300  | -3.60415600 | -3.38378800 |
| H | 6.88214300  | -5.04655900 | -1.79520400 |
| H | 6.90880100  | -2.02227100 | -4.83996000 |
| H | 7.85566900  | -4.10722500 | -3.87589100 |

**M3(SR)**

|   |             |             |             |
|---|-------------|-------------|-------------|
| O | -2.36035700 | 1.80428400  | 0.25783600  |
| N | 0.63192700  | -0.95153700 | -2.46541000 |
| N | -0.23032700 | -1.84218600 | -3.04188800 |
| N | -1.31795000 | -0.22325800 | -2.00645300 |
| C | 2.90787600  | -0.64091700 | -3.29014300 |
| H | 2.51602800  | 0.06548000  | -4.01409500 |
| C | 4.26507000  | -0.92328500 | -3.23222400 |

|   |             |             |             |
|---|-------------|-------------|-------------|
| H | 4.95349000  | -0.41673900 | -3.89985700 |
| C | 4.72503400  | -1.86010500 | -2.30917800 |
| H | 5.78629200  | -2.07750400 | -2.23076800 |
| C | 3.83141100  | -2.52329000 | -1.47827800 |
| H | 4.21595100  | -3.24762500 | -0.76834100 |
| C | 2.45748000  | -2.26081400 | -1.50498400 |
| C | 2.03852300  | -1.28142000 | -2.41249200 |
| C | -0.00695800 | 0.05656100  | -1.84683400 |
| C | -1.40131500 | -1.37132700 | -2.74440100 |
| C | -2.80621500 | -1.74869500 | -3.05184000 |
| H | -3.04885700 | -2.70830500 | -2.58777100 |
| H | -2.95238600 | -1.85669700 | -4.12789900 |
| C | -3.60661700 | -0.55699300 | -2.46057400 |
| H | -4.42160300 | -0.90180000 | -1.82463000 |
| H | -4.06299900 | 0.02432200  | -3.26304100 |
| C | -2.63018600 | 0.36961400  | -1.66274900 |
| H | -2.65219800 | 1.38733400  | -2.05994400 |
| C | -2.88245600 | 0.57018200  | -0.10793500 |
| C | -4.40027300 | 0.70013100  | 0.08600500  |
| C | -5.21189400 | -0.29818000 | 0.61892800  |
| C | -4.99182600 | 1.89674800  | -0.32655200 |
| C | -6.58990700 | -0.10745100 | 0.71189500  |
| H | -4.78811500 | -1.23186600 | 0.97458100  |
| C | -6.36741500 | 2.06956600  | -0.23901800 |
| H | -4.36133000 | 2.70227900  | -0.68870000 |
| C | -7.18369500 | 1.06951400  | 0.27845100  |
| C | -2.27205000 | -0.57583600 | 0.70216400  |
| C | -2.43558600 | -1.90610900 | 0.32863900  |
| C | -1.48243700 | -0.28979900 | 1.81856400  |
| C | -1.81107400 | -2.92901300 | 1.03941300  |
| H | -3.05304500 | -2.17342400 | -0.52312800 |
| C | -0.85525000 | -1.31384600 | 2.51455700  |
| H | -1.33499800 | 0.74118300  | 2.11568500  |
| C | -1.01405300 | -2.64451300 | 2.13760300  |
| H | -8.25623200 | 1.20854000  | 0.34852300  |
| H | -0.50845200 | -3.43620100 | 2.67940400  |
| H | -1.34578300 | 1.74739400  | 0.19388800  |
| C | -6.96678200 | 3.34379900  | -0.76698300 |
| C | -7.42575700 | -1.19064200 | 1.33617100  |
| C | -0.00018900 | -1.00640700 | 3.71536400  |
| C | -2.02780300 | -4.33998800 | 0.57970800  |
| F | -1.08495400 | -5.17133300 | 1.04247300  |
| F | -2.00717900 | -4.41297300 | -0.76741700 |
| F | -3.21521300 | -4.82069100 | 0.96977000  |

|   |             |             |             |
|---|-------------|-------------|-------------|
| F | 0.34992700  | 0.28033300  | 3.76779100  |
| F | 1.11022800  | -1.75101100 | 3.72344600  |
| F | -0.66275900 | -1.28682800 | 4.85267000  |
| F | -6.24108700 | 4.41093900  | -0.41239600 |
| F | -7.01326500 | 3.33212600  | -2.10948900 |
| F | -8.21743500 | 3.52918800  | -0.32761600 |
| F | -7.02129200 | -2.40604700 | 0.93550500  |
| F | -8.71965000 | -1.06538100 | 1.01554100  |
| F | -7.33883900 | -1.17044900 | 2.67229800  |
| C | 1.48562200  | -3.09197100 | -0.68450600 |
| C | 1.99094600  | -3.44496300 | 0.71548100  |
| C | 1.17102600  | -4.37851400 | -1.46795400 |
| H | 0.55511800  | -2.51970100 | -0.56103100 |
| H | 2.17639500  | -2.55431200 | 1.31690900  |
| H | 1.23870600  | -4.06993800 | 1.20577100  |
| H | 2.91063300  | -4.03764100 | 0.67070100  |
| H | 0.75509400  | -4.16070300 | -2.45419100 |
| H | 2.09076400  | -4.95809700 | -1.60225000 |
| H | 0.45916300  | -4.99447600 | -0.91363100 |
| C | 2.39067600  | 2.99920900  | -1.10795900 |
| C | 1.57686300  | 1.88788900  | -1.72220300 |
| H | 1.76429300  | 3.90393000  | -1.08402300 |
| C | 0.58608300  | 1.20905200  | -1.11303100 |
| H | 1.83856500  | 1.59677200  | -2.73191900 |
| C | 3.60838000  | 3.26973200  | -2.00956300 |
| C | 3.24697100  | 4.06720200  | -3.26130200 |
| H | 4.05016000  | 2.30644900  | -2.30092200 |
| H | 4.38541200  | 3.80723400  | -1.45345300 |
| C | 4.42829600  | 4.23405500  | -4.21230700 |
| H | 2.41605800  | 3.57687000  | -3.78548600 |
| H | 2.87024800  | 5.05346300  | -2.95899800 |
| H | 4.15835200  | 4.82358000  | -5.09219100 |
| H | 5.26149500  | 4.73707500  | -3.71224000 |
| H | 4.79070900  | 3.26034600  | -4.55757400 |
| O | 0.09576000  | 1.40189400  | 0.09172800  |
| H | 1.14831100  | 0.52466200  | 0.97667500  |
| C | 5.17732100  | -0.40313800 | 0.71090400  |
| C | 3.53350400  | 1.40405500  | 0.52052300  |
| C | 3.06815600  | 0.18757600  | 0.96535600  |
| N | 3.99896000  | -0.80870900 | 1.08123000  |
| O | 1.81110800  | -0.14665100 | 1.29617600  |
| S | 5.23703000  | 1.25922400  | 0.20621400  |
| C | 2.77236600  | 2.69398800  | 0.36805800  |
| H | 1.82127500  | 2.53303800  | 0.88703300  |

|   |             |              |              |
|---|-------------|--------------|--------------|
| C | 6. 34348400 | -1. 29683500 | 0. 65179500  |
| C | 6. 22701900 | -2. 59070600 | 1. 17574400  |
| C | 7. 54700600 | -0. 90579900 | 0. 05706000  |
| C | 7. 29719500 | -3. 47334700 | 1. 10189200  |
| H | 5. 28703500 | -2. 87750300 | 1. 63748300  |
| C | 8. 61601400 | -1. 79239100 | -0. 01267900 |
| H | 7. 64675600 | 0. 09205800  | -0. 36218300 |
| C | 8. 49469900 | -3. 07880800 | 0. 50730100  |
| H | 7. 19822100 | -4. 47287100 | 1. 51326900  |
| H | 9. 54525000 | -1. 47795100 | -0. 47691300 |
| H | 9. 32941900 | -3. 76981300 | 0. 45052600  |
| C | 3. 44644700 | 3. 86239800  | 1. 09191200  |
| C | 4. 01823500 | 3. 63896600  | 2. 35056100  |
| C | 3. 45317400 | 5. 16780200  | 0. 59335900  |
| C | 4. 58122100 | 4. 67841200  | 3. 08074600  |
| H | 4. 01623000 | 2. 63192600  | 2. 75852100  |
| C | 4. 02117400 | 6. 21195700  | 1. 32126200  |
| H | 3. 01639400 | 5. 38864100  | -0. 37547400 |
| C | 4. 58926900 | 5. 97280700  | 2. 56654700  |
| H | 5. 01639600 | 4. 47635300  | 4. 05451600  |
| H | 4. 01736900 | 7. 21555100  | 0. 90726200  |
| H | 5. 03366600 | 6. 78560800  | 3. 13197600  |

### M3(SS)

|   |              |              |              |
|---|--------------|--------------|--------------|
| O | 1. 61592900  | 0. 71515300  | 1. 51481100  |
| N | -0. 45910100 | -3. 69139600 | 1. 19158900  |
| N | 0. 60580100  | -4. 55035500 | 1. 18914700  |
| N | 1. 25917600  | -2. 43981700 | 1. 33870100  |
| C | -2. 49418900 | -4. 71563600 | 2. 02100100  |
| H | -2. 07118000 | -4. 64068200 | 3. 01791700  |
| C | -3. 73902300 | -5. 29066400 | 1. 80393600  |
| H | -4. 31456000 | -5. 67455200 | 2. 63880000  |
| C | -4. 22957600 | -5. 37313100 | 0. 50267000  |
| H | -5. 19823000 | -5. 82641400 | 0. 31723500  |
| C | -3. 48569800 | -4. 88638000 | -0. 56606600 |
| H | -3. 88819400 | -4. 96577600 | -1. 57003700 |
| C | -2. 22158400 | -4. 31393200 | -0. 38403800 |
| C | -1. 77170400 | -4. 22960000 | 0. 93662700  |
| C | -0. 09268000 | -2. 40435200 | 1. 30857300  |
| C | 1. 62824800  | -3. 75903000 | 1. 28695600  |
| C | 3. 09973700  | -3. 93907500 | 1. 43300500  |
| H | 3. 50398700  | -4. 63619900 | 0. 69819400  |
| H | 3. 31815600  | -4. 33382800 | 2. 42963100  |
| C | 3. 61469900  | -2. 49414500 | 1. 25565600  |

|   |             |             |             |
|---|-------------|-------------|-------------|
| H | 3.96899000  | -2.34401100 | 0.23412000  |
| H | 4.45166400  | -2.26551900 | 1.91560400  |
| C | 2.42815500  | -1.53736500 | 1.55311100  |
| H | 2.41605700  | -1.26063900 | 2.61204100  |
| C | 2.43072800  | -0.16599200 | 0.80460400  |
| C | 3.86270500  | 0.37434400  | 0.93552600  |
| C | 4.83142400  | 0.18723800  | -0.04770300 |
| C | 4.20741400  | 1.05328400  | 2.10590900  |
| C | 6.12890400  | 0.65502900  | 0.14794300  |
| H | 4.58096200  | -0.30951400 | -0.98127600 |
| C | 5.50634200  | 1.51317400  | 2.28880700  |
| H | 3.44373700  | 1.24270200  | 2.85259100  |
| C | 6.48115500  | 1.31743100  | 1.31561200  |
| C | 2.00775600  | -0.22733200 | -0.66856400 |
| C | 1.99299800  | -1.37776700 | -1.45252500 |
| C | 1.58964400  | 0.97942400  | -1.23824500 |
| C | 1.55406400  | -1.31620400 | -2.77601500 |
| H | 2.29016400  | -2.34384600 | -1.06037600 |
| C | 1.13818100  | 1.02427700  | -2.54669000 |
| H | 1.56272700  | 1.87304300  | -0.62415900 |
| C | 1.11507700  | -0.12432100 | -3.33228500 |
| H | 7.49034300  | 1.68522300  | 1.46033300  |
| H | 0.73880200  | -0.09014900 | -4.34930300 |
| H | 0.66826100  | 0.48399700  | 1.24328100  |
| C | 5.86989300  | 2.18595500  | 3.58389600  |
| C | 7.13405400  | 0.46376600  | -0.95378500 |
| C | 0.67727300  | 2.32658700  | -3.14977000 |
| C | 1.59362200  | -2.55206700 | -3.62673600 |
| F | 0.57308900  | -2.58928500 | -4.49846100 |
| F | 1.52460400  | -3.67394700 | -2.88363600 |
| F | 2.72248000  | -2.63258400 | -4.34284800 |
| F | 0.41424100  | 3.24643200  | -2.22336000 |
| F | -0.40667800 | 2.15828000  | -3.90956400 |
| F | 1.63943600  | 2.82904000  | -3.95042600 |
| F | 4.86319900  | 2.93220600  | 4.05206300  |
| F | 6.16284900  | 1.28156900  | 4.53261400  |
| F | 6.94182400  | 2.97659200  | 3.44748700  |
| F | 7.08997700  | -0.78963600 | -1.43386200 |
| F | 8.38378600  | 0.69504300  | -0.53419700 |
| F | 6.89565700  | 1.28349700  | -1.98496300 |
| C | -1.39707700 | -3.82047300 | -1.55984300 |
| C | -1.72125800 | -2.35387300 | -1.88977100 |
| C | -1.58299400 | -4.69868700 | -2.80065900 |
| H | -0.33898500 | -3.88191400 | -1.27596800 |

|   |             |             |             |
|---|-------------|-------------|-------------|
| H | -1.32601400 | -1.66277600 | -1.14053100 |
| H | -1.27554900 | -2.08199600 | -2.85101800 |
| H | -2.80462900 | -2.20543800 | -1.96369500 |
| H | -1.45751800 | -5.75967500 | -2.56807600 |
| H | -2.57265600 | -4.55530300 | -3.24543900 |
| H | -0.84519300 | -4.41739400 | -3.55404700 |
| C | -3.01674800 | -0.01758800 | 1.93579200  |
| C | -2.13783800 | -1.23598900 | 2.01516800  |
| H | -2.34764300 | 0.84591100  | 2.04663900  |
| C | -0.97347300 | -1.21106700 | 1.32686800  |
| H | -2.44222700 | -2.10978200 | 2.58308800  |
| C | -4.06698200 | 0.05338500  | 3.04359900  |
| C | -3.44851400 | 0.25908500  | 4.42517500  |
| H | -4.67801900 | -0.85871700 | 3.04206600  |
| H | -4.75870800 | 0.88005600  | 2.82873200  |
| C | -4.49717800 | 0.30701100  | 5.53227900  |
| H | -2.73119800 | -0.54720700 | 4.62734000  |
| H | -2.86693800 | 1.18916100  | 4.42181900  |
| H | -4.04088400 | 0.46021600  | 6.51370500  |
| H | -5.20682200 | 1.12224700  | 5.36068500  |
| H | -5.06975400 | -0.62526800 | 5.56868300  |
| O | -0.52903700 | -0.20443800 | 0.61631000  |
| H | -1.17473600 | 0.56648000  | -0.71854000 |
| C | -3.32575100 | 3.94434000  | -0.47193100 |
| C | -3.46535200 | 1.53890100  | -0.01537400 |
| C | -2.46583600 | 1.95681300  | -0.86033500 |
| N | -2.41500700 | 3.29568300  | -1.13188500 |
| O | -1.54321700 | 1.15449600  | -1.42693300 |
| S | -4.32732900 | 2.93652900  | 0.55041600  |
| C | -3.60932800 | 0.13162900  | 0.47557200  |
| H | -2.93329000 | -0.43072300 | -0.17687200 |
| C | -3.50796900 | 5.40099200  | -0.56649600 |
| C | -2.61144000 | 6.13654800  | -1.35093400 |
| C | -4.54175100 | 6.06382200  | 0.10083400  |
| C | -2.75412200 | 7.51326400  | -1.46243200 |
| H | -1.81339500 | 5.60507200  | -1.85884800 |
| C | -4.67863300 | 7.44240900  | -0.01273900 |
| H | -5.24642300 | 5.50074200  | 0.70740200  |
| C | -3.78624700 | 8.17093400  | -0.79479600 |
| H | -2.05628800 | 8.07800100  | -2.07243000 |
| H | -5.48541400 | 7.94787900  | 0.50809100  |
| H | -3.89485300 | 9.24712500  | -0.88434100 |
| C | -4.97132500 | -0.52933400 | 0.30997300  |
| C | -6.10745500 | 0.14074000  | -0.14258600 |



|   |             |             |             |
|---|-------------|-------------|-------------|
| C | -5.08408400 | -1.89636700 | 0.60100000  |
| C | -7.32659900 | -0.52435100 | -0.27413500 |
| H | -6.04643200 | 1.18790700  | -0.41508200 |
| C | -6.29827600 | -2.55918900 | 0.47524500  |
| H | -4.20367600 | -2.44589900 | 0.93118100  |
| C | -7.43097500 | -1.87307000 | 0.04064400  |
| H | -8.19593300 | 0.02132900  | -0.62790000 |
| H | -6.35819900 | -3.61592100 | 0.71715200  |
| H | -8.38117400 | -2.38820200 | -0.05820000 |

**TS4(RR)**

|   |             |             |             |
|---|-------------|-------------|-------------|
| O | -0.40959200 | 0.59905800  | -1.33801600 |
| N | 2.73398600  | 2.08267100  | 1.24650400  |
| N | 2.01781600  | 2.89093400  | 2.08144500  |
| N | 0.74392900  | 1.36171700  | 1.11684700  |
| C | 4.82479300  | 1.47912500  | 2.25727500  |
| H | 4.22273100  | 1.02144600  | 3.03855000  |
| C | 6.21103300  | 1.42810700  | 2.24698800  |
| H | 6.74265100  | 0.93056300  | 3.05063300  |
| C | 6.90992900  | 2.01172000  | 1.18933100  |
| H | 7.99429600  | 1.96694000  | 1.16875300  |
| C | 6.23077900  | 2.64585400  | 0.15628800  |
| H | 6.79308200  | 3.09628300  | -0.65665100 |
| C | 4.83198800  | 2.72453500  | 0.13570900  |
| C | 4.17171100  | 2.11971300  | 1.20480500  |
| C | 1.98588700  | 1.14454800  | 0.68001600  |
| C | 0.81353300  | 2.41580900  | 1.98883200  |
| C | -0.49882500 | 2.65443500  | 2.64755700  |
| H | -1.00081000 | 3.52649200  | 2.21743400  |
| H | -0.37665200 | 2.81536300  | 3.71886900  |
| C | -1.24036000 | 1.33051100  | 2.32637900  |
| H | -2.30824900 | 1.49676500  | 2.18469400  |
| H | -1.10998000 | 0.63257300  | 3.15850200  |
| C | -0.57447200 | 0.70455900  | 1.06386400  |
| H | -0.42052600 | -0.37503200 | 1.17274300  |
| C | -1.27027300 | 0.97981400  | -0.30249900 |
| C | -2.60819800 | 0.24895400  | -0.40777900 |
| C | -3.27127500 | 0.32986100  | -1.63899000 |
| C | -3.19664100 | -0.47184300 | 0.62404200  |
| C | -4.51294700 | -0.26045900 | -1.80404100 |
| H | -2.79936200 | 0.85511900  | -2.46341400 |
| C | -4.46641500 | -1.03052600 | 0.45711800  |
| H | -2.69815400 | -0.62105300 | 1.57636200  |
| C | -5.13644600 | -0.92722400 | -0.74775400 |

|   |             |             |             |
|---|-------------|-------------|-------------|
| C | -1.44463700 | 2.49021400  | -0.45427100 |
| C | -2.57893400 | 3.15999200  | -0.00364100 |
| C | -0.37348500 | 3.22971800  | -0.96452400 |
| C | -2.62062500 | 4.55281700  | -0.01992200 |
| H | -3.43940300 | 2.60488700  | 0.36089400  |
| C | -0.42762600 | 4.61782700  | -0.96709200 |
| H | 0.49339900  | 2.70582400  | -1.35917600 |
| C | -1.54562400 | 5.29547400  | -0.48943600 |
| H | -6.12067700 | -1.36631900 | -0.87251000 |
| H | -1.58259400 | 6.37911300  | -0.49331300 |
| H | -0.34526000 | -0.36953600 | -1.44461400 |
| C | -5.11421400 | -1.66778100 | 1.65492600  |
| C | -5.24803600 | -0.16487100 | -3.11236300 |
| C | 0.78797200  | 5.39471000  | -1.38929400 |
| C | -3.81046900 | 5.24339300  | 0.58454700  |
| F | -3.71259600 | 5.26075900  | 1.92523100  |
| F | -4.95312200 | 4.61352500  | 0.28493100  |
| F | -3.91652600 | 6.51215600  | 0.17585500  |
| F | 1.48733000  | 4.75579800  | -2.33913500 |
| F | 1.61887200  | 5.56957100  | -0.34713500 |
| F | 0.47281100  | 6.60807700  | -1.85449000 |
| F | -4.28686400 | -2.51808300 | 2.27105800  |
| F | -5.44640300 | -0.73002200 | 2.56047500  |
| F | -6.23587300 | -2.32376800 | 1.33629100  |
| F | -6.34671800 | 0.59489100  | -2.99188000 |
| F | -5.65573900 | -1.37426800 | -3.52461500 |
| F | -4.49206900 | 0.36578200  | -4.07831300 |
| C | 4.10780600  | 3.44469500  | -0.98466000 |
| C | 4.36603000  | 2.77481900  | -2.33819300 |
| C | 4.50659200  | 4.92468200  | -1.01671300 |
| H | 3.03201000  | 3.39786900  | -0.78287000 |
| H | 4.06927200  | 1.72402100  | -2.32129300 |
| H | 3.78985700  | 3.28412600  | -3.11597500 |
| H | 5.42567000  | 2.83854000  | -2.60778800 |
| H | 4.30635800  | 5.41190400  | -0.05931500 |
| H | 5.57207700  | 5.03481500  | -1.24349200 |
| H | 3.94005700  | 5.44454800  | -1.79306800 |
| C | 3.49956500  | -2.24849800 | -0.38155700 |
| C | 2.90461800  | -1.13477500 | 0.46981200  |
| H | 3.35636800  | -2.00668800 | -1.44463200 |
| C | 2.49784500  | 0.04253100  | -0.22782700 |
| H | 3.48317000  | -0.87959400 | 1.36660900  |
| C | 5.01940200  | -2.32848800 | -0.17672000 |
| C | 5.73680700  | -1.04900500 | -0.60804200 |

|   |             |             |             |
|---|-------------|-------------|-------------|
| H | 5.42575700  | -3.17587000 | -0.74168600 |
| H | 5.22660200  | -2.52850700 | 0.88584500  |
| C | 7.24431600  | -1.12067600 | -0.38667200 |
| H | 5.52228100  | -0.86148800 | -1.66816600 |
| H | 5.33399600  | -0.18997200 | -0.05728700 |
| H | 7.73740500  | -0.20483600 | -0.72482000 |
| H | 7.47444700  | -1.24975200 | 0.67653600  |
| H | 7.68537800  | -1.96335200 | -0.92860900 |
| O | 2.40956200  | 0.23927100  | -1.43992200 |
| H | 1.59113300  | -1.43150100 | -1.83754200 |
| C | -1.11155600 | -3.88641700 | 0.13983000  |
| C | 1.29736100  | -3.53730200 | -0.19759600 |
| C | 0.44244700  | -2.76990200 | -0.94540600 |
| N | -0.89501800 | -2.94929700 | -0.74128300 |
| O | 0.71951800  | -1.85590900 | -1.91633100 |
| S | 0.33427400  | -4.58452600 | 0.79108400  |
| C | 2.80550900  | -3.61276100 | -0.11728700 |
| H | 3.05516500  | -3.89034100 | 0.91678100  |
| C | -2.45567600 | -4.36962900 | 0.48694500  |
| C | -3.51732600 | -4.06459000 | -0.37285200 |
| C | -2.69201500 | -5.14638000 | 1.62381700  |
| C | -4.79358700 | -4.53724100 | -0.09729700 |
| H | -3.31564200 | -3.46369100 | -1.25429700 |
| C | -3.97166300 | -5.61785000 | 1.89436500  |
| H | -1.87523500 | -5.37372700 | 2.30401900  |
| C | -5.02498300 | -5.31491300 | 1.03578600  |
| H | -5.61233500 | -4.29838200 | -0.76942700 |
| H | -4.14833400 | -6.21687800 | 2.78176800  |
| H | -6.02416600 | -5.67999800 | 1.25019400  |
| C | 3.34053200  | -4.69785800 | -1.03840200 |
| C | 3.00516800  | -4.69150000 | -2.39552500 |
| C | 4.19171200  | -5.69191200 | -0.55808200 |
| C | 3.51948800  | -5.65700900 | -3.25336700 |
| H | 2.32445500  | -3.93157900 | -2.77438600 |
| C | 4.70548800  | -6.66314100 | -1.41513000 |
| H | 4.45653400  | -5.70247500 | 0.49655500  |
| C | 4.37192800  | -6.64608200 | -2.76527300 |
| H | 3.24988600  | -5.64238800 | -4.30473500 |
| H | 5.36570900  | -7.43184100 | -1.02592500 |
| H | 4.76956200  | -7.40120700 | -3.43561400 |
| H | 1.85256300  | -1.43538900 | 1.23409900  |
| C | 1.30262200  | -1.01614000 | 3.25636000  |
| O | 1.00294500  | -1.69605100 | 2.19708700  |
| O | 2.01266600  | -0.00348700 | 3.27134000  |

|   |             |             |            |
|---|-------------|-------------|------------|
| C | 0.70273100  | -1.55819100 | 4.54288300 |
| H | 1.18971100  | -2.50597100 | 4.78751100 |
| H | 0.84683500  | -0.85165200 | 5.35963900 |
| H | -0.35883900 | -1.77350500 | 4.39832900 |

**TS4(RS)**

|   |             |             |             |
|---|-------------|-------------|-------------|
| O | -0.19066800 | -0.07177000 | -0.42027800 |
| N | 1.24518800  | 3.59798300  | 1.05054500  |
| N | 0.16715200  | 4.10835600  | 1.72185300  |
| N | -0.02718000 | 1.94054400  | 1.36229400  |
| C | 3.47639100  | 4.35390300  | 1.56749000  |
| H | 3.42568500  | 3.72463800  | 2.45126600  |
| C | 4.60292800  | 5.10740600  | 1.26930000  |
| H | 5.46738000  | 5.07550000  | 1.92277000  |
| C | 4.60696300  | 5.90353200  | 0.12486900  |
| H | 5.48262300  | 6.49670700  | -0.11796200 |
| C | 3.49867500  | 5.94265300  | -0.71224400 |
| H | 3.52181600  | 6.56560000  | -1.60157600 |
| C | 2.34865300  | 5.19244000  | -0.44387700 |
| C | 2.37977800  | 4.41276600  | 0.71136800  |
| C | 1.14950500  | 2.28747700  | 0.83911800  |
| C | -0.58763100 | 3.06430800  | 1.90254500  |
| C | -1.86068200 | 2.73320300  | 2.61116400  |
| H | -2.72640500 | 3.00608300  | 2.00022200  |
| H | -1.93365100 | 3.25434800  | 3.56581600  |
| C | -1.70708300 | 1.19645500  | 2.78201400  |
| H | -2.66020000 | 0.66711600  | 2.76918000  |
| H | -1.21751700 | 0.99737000  | 3.73789300  |
| C | -0.74442700 | 0.70247900  | 1.67638100  |
| H | -0.00340900 | 0.01429600  | 2.06414200  |
| C | -1.33159400 | 0.06091900  | 0.39268000  |
| C | -1.86788800 | -1.33500000 | 0.73089900  |
| C | -3.04817800 | -1.85336700 | 0.20137300  |
| C | -1.06022700 | -2.17595300 | 1.50809700  |
| C | -3.44115600 | -3.15689500 | 0.50145100  |
| H | -3.66410700 | -1.26471100 | -0.47112800 |
| C | -1.48461400 | -3.45880000 | 1.82517400  |
| H | -0.07235300 | -1.86293800 | 1.84275300  |
| C | -2.68319100 | -3.96454300 | 1.33618500  |
| C | -2.33358000 | 1.01821700  | -0.24968300 |
| C | -3.63160100 | 1.17644900  | 0.23894900  |
| C | -1.90072600 | 1.84503200  | -1.29063100 |
| C | -4.47294500 | 2.14803900  | -0.29343700 |
| H | -4.00608100 | 0.54087700  | 1.03599300  |

|   |             |             |             |
|---|-------------|-------------|-------------|
| C | -2.76189600 | 2.79808700  | -1.82653700 |
| H | -0.89083800 | 1.73151600  | -1.67720500 |
| C | -4.05116500 | 2.96556700  | -1.33348300 |
| H | -2.99138100 | -4.97910700 | 1.55898000  |
| H | -4.71717300 | 3.70898900  | -1.75728200 |
| H | 1.83747100  | 0.59308400  | -2.57958700 |
| C | -0.61707700 | -4.27649300 | 2.74237600  |
| C | -4.70960400 | -3.67555300 | -0.11463700 |
| C | -2.27445100 | 3.71050000  | -2.91810000 |
| C | -5.81621200 | 2.35985700  | 0.34552300  |
| F | -5.68952300 | 3.08406200  | 1.47162900  |
| F | -6.38730300 | 1.19941500  | 0.69080500  |
| F | -6.65884200 | 3.01405100  | -0.45910900 |
| F | -1.73504400 | 4.83137900  | -2.39956100 |
| F | -3.27223000 | 4.09638400  | -3.72191500 |
| F | -1.33236200 | 3.13493900  | -3.66935800 |
| F | 0.67661500  | -4.19824300 | 2.40436300  |
| F | -0.70920000 | -3.83280600 | 4.00940200  |
| F | -0.96615700 | -5.56927400 | 2.75141300  |
| F | -5.79373800 | -3.11349900 | 0.44126200  |
| F | -4.83048700 | -5.00160500 | 0.02043700  |
| F | -4.76004100 | -3.39375900 | -1.42716200 |
| C | 1.14956100  | 5.24755500  | -1.36854800 |
| C | 1.52730800  | 4.80610700  | -2.78594500 |
| C | 0.54018700  | 6.65429100  | -1.35614500 |
| H | 0.39017700  | 4.55032900  | -0.99717000 |
| H | 1.95661900  | 3.80147200  | -2.77200100 |
| H | 0.63812900  | 4.79772300  | -3.42043700 |
| H | 2.25511900  | 5.49208200  | -3.23140700 |
| H | 0.23762200  | 6.94112100  | -0.34529000 |
| H | 1.26321800  | 7.39283900  | -1.71764900 |
| H | -0.33551600 | 6.69144300  | -2.00745000 |
| C | 4.19728800  | -0.09171700 | 0.16886400  |
| C | 2.99708300  | 0.63241200  | 0.77220300  |
| H | 5.00579200  | 0.64146600  | 0.02252200  |
| C | 2.15591300  | 1.48465200  | 0.00949500  |
| H | 3.22571700  | 1.12905100  | 1.72164300  |
| C | 4.72887700  | -1.15056600 | 1.14831500  |
| C | 5.18496700  | -0.58756200 | 2.49484000  |
| H | 5.57576600  | -1.66813700 | 0.68166500  |
| H | 3.95195600  | -1.90052700 | 1.34259200  |
| C | 5.76505600  | -1.67764700 | 3.39229700  |
| H | 5.93502900  | 0.19716000  | 2.32838400  |
| H | 4.34536500  | -0.10873200 | 3.01299100  |

|   |             |             |             |
|---|-------------|-------------|-------------|
| H | 6.06987800  | -1.28147700 | 4.36483100  |
| H | 5.02459500  | -2.46611000 | 3.56365400  |
| H | 6.63978800  | -2.14362700 | 2.92801100  |
| O | 2.05991300  | 1.71436400  | -1.20027400 |
| H | -0.36125800 | -0.69466800 | -1.14909200 |
| C | 0.80483100  | -3.10676600 | -1.36134100 |
| C | 2.67325600  | -1.50826400 | -1.36669000 |
| C | 1.63288600  | -1.25339400 | -2.22729500 |
| N | 0.59475600  | -2.14409800 | -2.22043000 |
| O | 1.51098700  | -0.19530700 | -3.05208000 |
| S | 2.27728100  | -2.93705900 | -0.46119500 |
| C | 3.92235000  | -0.67667800 | -1.25073500 |
| H | 3.72195100  | 0.19051900  | -1.88654800 |
| C | -0.12654000 | -4.23308600 | -1.18558400 |
| C | -1.33073500 | -4.22944800 | -1.90071600 |
| C | 0.17021500  | -5.31647700 | -0.35167100 |
| C | -2.22096400 | -5.28931300 | -1.77717300 |
| H | -1.54758100 | -3.39017300 | -2.55326900 |
| C | -0.72972500 | -6.36859400 | -0.22122300 |
| H | 1.10360600  | -5.33698400 | 0.20319700  |
| C | -1.92763300 | -6.35830200 | -0.93242400 |
| H | -3.15495800 | -5.27323300 | -2.32909800 |
| H | -0.49290400 | -7.19624100 | 0.43917100  |
| H | -2.63080900 | -7.17881600 | -0.83052600 |
| C | 5.18520500  | -1.31373800 | -1.82785300 |
| C | 5.33780800  | -2.68078100 | -2.05736000 |
| C | 6.25750000  | -0.46823300 | -2.13714100 |
| C | 6.53266600  | -3.19003700 | -2.56447200 |
| H | 4.51888500  | -3.36124000 | -1.85308400 |
| C | 7.44989400  | -0.97190000 | -2.64234800 |
| H | 6.14837000  | 0.60381200  | -1.98882500 |
| C | 7.59408400  | -2.34116500 | -2.85501300 |
| H | 6.62747200  | -4.25785500 | -2.73567400 |
| H | 8.26460000  | -0.29434800 | -2.87860400 |
| H | 8.52260600  | -2.73917700 | -3.25144000 |
| C | 1.77670700  | -0.38672700 | 3.50679800  |
| O | 1.59836400  | 0.83399300  | 3.57217200  |
| O | 1.83372700  | -1.05203400 | 2.38934800  |
| H | 2.23110700  | -0.24588000 | 1.45522000  |
| C | 1.94212300  | -1.23441800 | 4.75156600  |
| H | 1.29674600  | -2.11367600 | 4.68968200  |
| H | 2.97536600  | -1.59192000 | 4.79673700  |
| H | 1.71768300  | -0.65121100 | 5.64377000  |

**TS4(SR)**

|   |             |             |             |
|---|-------------|-------------|-------------|
| N | -0.71421200 | -1.04255300 | 1.97756100  |
| N | 0.16046100  | -1.56212200 | 2.87951500  |
| N | 1.13207700  | -0.07483800 | 1.57014200  |
| C | -2.87923600 | -0.86715800 | 3.00471600  |
| H | -2.41937000 | -0.14073900 | 3.67052600  |
| C | -4.20956600 | -1.25668800 | 3.10222700  |
| H | -4.84434200 | -0.83359400 | 3.87300000  |
| C | -4.71658100 | -2.19175700 | 2.20237200  |
| H | -5.75735800 | -2.49773200 | 2.26152500  |
| C | -3.90894000 | -2.72999100 | 1.20423700  |
| H | -4.33873500 | -3.43550800 | 0.50138100  |
| C | -2.56444600 | -2.37278300 | 1.07700500  |
| C | -2.09886400 | -1.43359000 | 2.00252600  |
| C | -0.15316000 | -0.12479400 | 1.20224700  |
| C | 1.26913000  | -0.93765600 | 2.61944300  |
| C | 2.62563300  | -0.86912100 | 3.22227300  |
| H | 3.13545200  | -1.83344800 | 3.15395300  |
| H | 2.54464700  | -0.60652900 | 4.27859700  |
| C | 3.30227800  | 0.25820700  | 2.39198700  |
| H | 4.28068000  | -0.04917400 | 2.02215600  |
| H | 3.45946600  | 1.13691300  | 3.01960800  |
| C | 2.35530200  | 0.66768600  | 1.21623500  |
| C | 2.84561300  | 0.39716700  | -0.26464700 |
| C | 4.34097000  | 0.71767200  | -0.33652100 |
| C | 5.33152900  | -0.23779000 | -0.53521100 |
| C | 4.71277100  | 2.05937800  | -0.19836300 |
| C | 6.67362400  | 0.14169000  | -0.57437200 |
| H | 5.07985500  | -1.28198500 | -0.68877500 |
| C | 6.05151000  | 2.42226700  | -0.23788400 |
| H | 3.94673600  | 2.82095000  | -0.09300800 |
| C | 7.04826100  | 1.46714900  | -0.42289700 |
| C | 2.50576600  | -1.02646800 | -0.70232100 |
| C | 2.82001900  | -2.12511000 | 0.10025100  |
| C | 1.80284700  | -1.24972700 | -1.88252500 |
| C | 2.41917300  | -3.40582700 | -0.25671400 |
| H | 3.38849100  | -1.99450300 | 1.01694100  |
| C | 1.40571300  | -2.53844700 | -2.23308800 |
| H | 1.54986700  | -0.41486600 | -2.52584100 |
| C | 1.70704900  | -3.62900700 | -1.42986700 |
| H | 8.09176300  | 1.75691500  | -0.46895900 |
| H | 1.38712800  | -4.62734400 | -1.70461600 |
| H | 1.28958200  | 1.20790400  | -1.13640200 |
| C | 6.43024200  | 3.86513000  | -0.03898500 |

|   |             |             |             |
|---|-------------|-------------|-------------|
| C | 7.71225700  | -0.93058800 | -0.75848700 |
| C | 0.59969200  | -2.70579700 | -3.49239600 |
| C | 2.76242900  | -4.53183200 | 0.67678400  |
| F | 2.37540800  | -4.24126300 | 1.93328000  |
| F | 4.08451000  | -4.74458000 | 0.72412800  |
| F | 2.17439800  | -5.67772600 | 0.32286900  |
| F | -0.51497300 | -1.96590400 | -3.44135500 |
| F | 0.23537800  | -3.98096600 | -3.68463700 |
| F | 1.28811000  | -2.31020200 | -4.57034500 |
| F | 6.55762000  | 4.15835500  | 1.26367300  |
| F | 7.59932200  | 4.15103500  | -0.62589200 |
| F | 5.50316900  | 4.68926000  | -0.54046400 |
| F | 7.86830700  | -1.64935200 | 0.36379100  |
| F | 8.90617900  | -0.42029600 | -1.07829000 |
| F | 7.35808100  | -1.78888100 | -1.72421200 |
| C | -1.63670000 | -3.04584400 | 0.07680200  |
| C | -2.36361900 | -3.62432800 | -1.13748800 |
| C | -0.85545200 | -4.15241600 | 0.80608300  |
| H | -0.92361900 | -2.29606900 | -0.29892600 |
| H | -3.00828100 | -2.88381200 | -1.61695900 |
| H | -1.62602000 | -3.96714200 | -1.86876600 |
| H | -2.96576500 | -4.49446700 | -0.85357600 |
| H | -0.19065500 | -3.75570100 | 1.57834900  |
| H | -1.55868300 | -4.84027400 | 1.28667400  |
| H | -0.25596300 | -4.73184200 | 0.09875100  |
| C | -2.22312500 | 2.91751100  | -0.07709700 |
| C | -1.60246000 | 1.82641600  | 0.78399600  |
| H | -1.40000400 | 3.56120000  | -0.41919900 |
| C | -0.81424400 | 0.79222300  | 0.18887700  |
| H | -2.20881800 | 1.45354600  | 1.61618000  |
| C | -3.14161200 | 3.79756800  | 0.78116600  |
| C | -2.47463100 | 4.32848100  | 2.05336400  |
| H | -4.04154500 | 3.23433000  | 1.06580600  |
| H | -3.48294100 | 4.64160800  | 0.17041200  |
| C | -3.33463200 | 5.38298200  | 2.74441500  |
| H | -2.28568200 | 3.50112200  | 2.74884100  |
| H | -1.48890100 | 4.74303500  | 1.80822200  |
| H | -2.86445000 | 5.74297700  | 3.66333500  |
| H | -3.49970000 | 6.24457400  | 2.09008100  |
| H | -4.31619100 | 4.97563900  | 3.00819600  |
| O | -0.41986200 | 0.68597600  | -0.98037900 |
| H | -1.80389000 | -0.00629200 | -2.23575400 |
| C | -5.52982800 | -0.46862100 | -0.64625800 |
| C | -3.80247600 | 1.20333300  | -1.15099100 |



|   |             |             |             |
|---|-------------|-------------|-------------|
| C | -3.63605500 | -0.05247900 | -1.68283800 |
| N | -4.61028100 | -0.97113100 | -1.41634400 |
| O | -2.61901700 | -0.48039000 | -2.46002800 |
| S | -5.24415000 | 1.18265700  | -0.17727700 |
| C | -2.90437000 | 2.38410600  | -1.37593100 |
| H | -2.08634900 | 1.99144200  | -1.98846200 |
| C | -6.68637100 | -1.23942500 | -0.16843400 |
| C | -6.85860800 | -2.54785000 | -0.63588300 |
| C | -7.58518600 | -0.72137800 | 0.76868700  |
| C | -7.90621100 | -3.32612100 | -0.16078300 |
| H | -6.15565400 | -2.93361200 | -1.36730500 |
| C | -8.63424700 | -1.50327800 | 1.23929600  |
| H | -7.45940200 | 0.29085800  | 1.14411800  |
| C | -8.79570900 | -2.80859200 | 0.78028500  |
| H | -8.03204300 | -4.33966900 | -0.52770900 |
| H | -9.32564800 | -1.09350600 | 1.96832500  |
| H | -9.61340000 | -3.41848500 | 1.15022800  |
| C | -3.49415200 | 3.53208300  | -2.19316400 |
| C | -4.85397700 | 3.68970300  | -2.45715600 |
| C | -2.60553300 | 4.48501400  | -2.70792300 |
| C | -5.31482000 | 4.77822600  | -3.19691200 |
| H | -5.56707400 | 2.95571000  | -2.10113100 |
| C | -3.06161000 | 5.57107200  | -3.44396900 |
| H | -1.53804000 | 4.36633800  | -2.53707500 |
| C | -4.42474500 | 5.72516200  | -3.68852900 |
| H | -6.37814300 | 4.87885500  | -3.39081500 |
| H | -2.35164400 | 6.29335200  | -3.83452500 |
| H | -4.78501600 | 6.57099700  | -4.26507800 |
| H | -0.67053300 | 2.30526700  | 1.42936000  |
| C | 0.15551400  | 2.32889800  | 3.45214900  |
| O | 0.43504500  | 2.79963700  | 2.29000700  |
| O | -0.49540200 | 1.28995000  | 3.65749700  |
| C | 0.64445600  | 3.15817100  | 4.63100200  |
| H | 0.01354300  | 4.04914800  | 4.70835700  |
| H | 0.57815500  | 2.59071100  | 5.55899600  |
| H | 1.66606100  | 3.50304000  | 4.45734900  |
| H | 2.11196600  | 1.73294100  | 1.27261000  |
| O | 2.25264500  | 1.34565400  | -1.11538700 |

**TS4(SS)**

|   |             |             |             |
|---|-------------|-------------|-------------|
| O | -1.23184100 | 1.52764700  | -0.46880400 |
| N | -0.37449700 | -3.15598800 | -1.07020600 |
| N | -1.57899300 | -3.67398500 | -1.43447200 |
| N | -1.58592200 | -1.46573300 | -1.48448800 |

|   |              |              |              |
|---|--------------|--------------|--------------|
| C | 1. 42149100  | -4. 58649500 | -1. 79139500 |
| H | 1. 12465200  | -4. 33315400 | -2. 80559800 |
| C | 2. 46375600  | -5. 45545200 | -1. 49644600 |
| H | 3. 01891900  | -5. 92794000 | -2. 29936600 |
| C | 2. 79422600  | -5. 70352900 | -0. 16497100 |
| H | 3. 60792100  | -6. 38215600 | 0. 07249000  |
| C | 2. 10056900  | -5. 08426100 | 0. 87084300  |
| H | 2. 38285700  | -5. 29151600 | 1. 89766800  |
| C | 1. 03603600  | -4. 21298900 | 0. 61574500  |
| C | 0. 73298700  | -4. 00416700 | -0. 73300000 |
| C | -0. 35216600 | -1. 83447700 | -1. 12944100 |
| C | -2. 29047800 | -2. 61809000 | -1. 69417400 |
| C | -3. 66459100 | -2. 34108700 | -2. 19268200 |
| H | -4. 41493600 | -2. 75622200 | -1. 51489300 |
| H | -3. 80746000 | -2. 80386100 | -3. 17088100 |
| C | -3. 69037800 | -0. 78679700 | -2. 27265000 |
| H | -4. 54166200 | -0. 37480800 | -1. 72955800 |
| H | -3. 79491300 | -0. 46701600 | -3. 31016700 |
| C | -2. 34123900 | -0. 22254600 | -1. 71708400 |
| H | -1. 80577400 | 0. 34042300  | -2. 48622200 |
| C | -2. 38483400 | 0. 72086900  | -0. 45251600 |
| C | -3. 54166500 | 1. 70292100  | -0. 65301100 |
| C | -4. 73898800 | 1. 63258100  | 0. 04857000  |
| C | -3. 37661000 | 2. 70188500  | -1. 62038400 |
| C | -5. 76450700 | 2. 54005200  | -0. 22279200 |
| H | -4. 89333800 | 0. 87954400  | 0. 81527500  |
| C | -4. 40463900 | 3. 59581900  | -1. 87910100 |
| H | -2. 43609000 | 2. 78420800  | -2. 15514900 |
| C | -5. 61186200 | 3. 52315000  | -1. 18615900 |
| C | -2. 48131400 | -0. 06984000 | 0. 85201900  |
| C | -3. 32747900 | -1. 17192000 | 0. 97512300  |
| C | -1. 66970400 | 0. 26306800  | 1. 93504900  |
| C | -3. 33846900 | -1. 93936400 | 2. 13391900  |
| H | -3. 99363000 | -1. 45267900 | 0. 16584400  |
| C | -1. 68353200 | -0. 51350500 | 3. 09049100  |
| H | -1. 00031200 | 1. 11494100  | 1. 87459600  |
| C | -2. 51443400 | -1. 62040100 | 3. 20668500  |
| H | -6. 41607200 | 4. 21843000  | -1. 39981700 |
| H | -2. 51218100 | -2. 22515100 | 4. 10640600  |
| H | -0. 46238900 | 1. 01459500  | -0. 17263000 |
| C | -4. 21310000 | 4. 69678800  | -2. 88732200 |
| C | -7. 03442100 | 2. 43688700  | 0. 57603000  |
| C | -0. 74701600 | -0. 12912500 | 4. 20480900  |
| C | -4. 26503900 | -3. 12092500 | 2. 17788400  |

|   |             |             |             |
|---|-------------|-------------|-------------|
| F | -4.02515300 | -3.91253100 | 3.22774000  |
| F | -4.13848400 | -3.86560200 | 1.06315400  |
| F | -5.54714200 | -2.73853100 | 2.23951500  |
| F | -1.07455300 | 1.05621300  | 4.72931100  |
| F | 0.50996700  | -0.03555300 | 3.75782200  |
| F | -0.76281100 | -1.03293200 | 5.19738900  |
| F | -3.89713100 | 5.85290300  | -2.29075800 |
| F | -3.23619400 | 4.41004800  | -3.75459400 |
| F | -5.33655500 | 4.90943200  | -3.58815700 |
| F | -7.48296300 | 1.17198700  | 0.60387100  |
| F | -8.00698100 | 3.20370800  | 0.07088500  |
| F | -6.84245900 | 2.80887800  | 1.84799700  |
| C | 0.19013200  | -3.62458600 | 1.73333600  |
| C | 1.00406800  | -3.26131800 | 2.97508700  |
| C | -0.93089500 | -4.61788400 | 2.07239400  |
| H | -0.27193400 | -2.69447400 | 1.37618000  |
| H | 1.81592300  | -2.56923800 | 2.73458000  |
| H | 0.35590100  | -2.77874200 | 3.71127100  |
| H | 1.42959400  | -4.14811600 | 3.45452000  |
| H | -1.58712700 | -4.78837800 | 1.21355200  |
| H | -0.50318800 | -5.58058900 | 2.37112700  |
| H | -1.53788400 | -4.24794600 | 2.90308100  |
| C | 2.84394800  | 0.31584400  | -1.46044800 |
| C | 1.75939300  | -0.68009600 | -1.83745000 |
| H | 2.34627700  | 1.13642200  | -0.92506900 |
| C | 0.81279300  | -0.92791600 | -0.80064900 |
| H | 2.06033400  | -1.58446800 | -2.38068200 |
| C | 3.53284000  | 0.94098800  | -2.67427500 |
| C | 2.62669800  | 1.87539800  | -3.47647500 |
| H | 3.92369800  | 0.15211600  | -3.32997500 |
| H | 4.39930500  | 1.51671400  | -2.31944500 |
| C | 3.37221200  | 2.52589800  | -4.63909200 |
| H | 1.75877100  | 1.32632500  | -3.85656400 |
| H | 2.23759100  | 2.65307100  | -2.80681200 |
| H | 2.72234100  | 3.19915800  | -5.20379700 |
| H | 4.22932700  | 3.10625600  | -4.28248700 |
| H | 3.75075500  | 1.76778800  | -5.33227700 |
| O | 0.71426700  | -0.34901000 | 0.29425000  |
| H | 2.04315100  | 0.70707000  | 1.15808800  |
| C | 5.75643900  | 2.41778900  | 1.68803100  |
| C | 4.47057200  | 0.75440900  | 0.42905900  |
| C | 3.78726400  | 1.51012300  | 1.35116000  |
| N | 4.50550700  | 2.43584700  | 2.04673600  |
| O | 2.47392200  | 1.42960700  | 1.64439600  |

|   |             |             |             |
|---|-------------|-------------|-------------|
| S | 6.13717300  | 1.23616400  | 0.46495800  |
| C | 3.83471600  | -0.31629400 | -0.42269900 |
| H | 3.20614800  | -0.89583400 | 0.27008300  |
| C | 6.77773800  | 3.30278500  | 2.27022800  |
| C | 6.41991400  | 4.12402400  | 3.34568000  |
| C | 8.08582300  | 3.34685000  | 1.77941100  |
| C | 7.35981800  | 4.97087100  | 3.91833200  |
| H | 5.40073700  | 4.07903100  | 3.71372900  |
| C | 9.02336800  | 4.19494200  | 2.35711100  |
| H | 8.37359900  | 2.72260400  | 0.93750400  |
| C | 8.66361000  | 5.00963700  | 3.42756500  |
| H | 7.07456200  | 5.60290600  | 4.75321200  |
| H | 10.03574400 | 4.22264000  | 1.96736300  |
| H | 9.39597000  | 5.67318200  | 3.87603100  |
| C | 4.78524900  | -1.32552100 | -1.04155300 |
| C | 5.88899000  | -0.95048300 | -1.81874200 |
| C | 4.54298400  | -2.68955000 | -0.85849100 |
| C | 6.73272100  | -1.90761900 | -2.37270000 |
| H | 6.09467500  | 0.09866200  | -2.00289100 |
| C | 5.38823900  | -3.64927800 | -1.41026800 |
| H | 3.68415600  | -3.00473000 | -0.26747200 |
| C | 6.48901200  | -3.26228500 | -2.16632200 |
| H | 7.58401200  | -1.59160500 | -2.96715300 |
| H | 5.18682900  | -4.70174800 | -1.23977100 |
| H | 7.15246200  | -4.00855400 | -2.59138200 |
| H | 0.91837100  | -0.31381600 | -2.72129600 |
| C | -0.19165000 | -1.34727600 | -4.31356000 |
| O | -0.03199700 | -0.19085500 | -3.76740900 |
| O | 0.06551100  | -2.42887600 | -3.76426500 |
| C | -0.73801700 | -1.32192900 | -5.73210600 |
| H | -1.61959600 | -0.67794500 | -5.78115000 |
| H | 0.01377000  | -0.88378500 | -6.39364200 |
| H | -0.97988200 | -2.32935000 | -6.06911900 |

**M4(RR)**

|   |             |             |             |
|---|-------------|-------------|-------------|
| O | -0.58501900 | -0.40054100 | 1.25843400  |
| N | 1.66598300  | -2.40216000 | -1.88690300 |
| N | 0.67569100  | -2.68991100 | -2.77893600 |
| N | 0.11383600  | -1.02998000 | -1.42108600 |
| C | 3.81405200  | -2.57401300 | -2.95698200 |
| H | 3.47040400  | -1.79637200 | -3.63177700 |
| C | 5.09744600  | -3.09013600 | -3.04208700 |
| H | 5.78172700  | -2.72696100 | -3.80048500 |
| C | 5.49709600  | -4.06784700 | -2.13166300 |

|   |             |             |             |
|---|-------------|-------------|-------------|
| H | 6.50294600  | -4.47219400 | -2.17877100 |
| C | 4.61333900  | -4.53681800 | -1.16821500 |
| H | 4.93840800  | -5.31145500 | -0.48061600 |
| C | 3.30490500  | -4.04577500 | -1.06066900 |
| C | 2.95201500  | -3.04705400 | -1.96925000 |
| C | 1.35054600  | -1.40038600 | -1.05667000 |
| C | -0.25745300 | -1.84261800 | -2.46315500 |
| C | -1.61168600 | -1.49984000 | -2.97735800 |
| H | -2.34562700 | -2.22962000 | -2.62111600 |
| H | -1.63911300 | -1.48704700 | -4.06729400 |
| C | -1.82563500 | -0.10201900 | -2.34749100 |
| H | -2.87132700 | 0.06773300  | -2.09187000 |
| H | -1.52775000 | 0.67312600  | -3.05915800 |
| C | -0.90290100 | 0.00215800  | -1.10125800 |
| H | -0.39836400 | 0.96898500  | -1.04885100 |
| C | -1.56314400 | -0.28416000 | 0.27830800  |
| C | -2.53049400 | 0.84667100  | 0.65680700  |
| C | -3.13734500 | 0.72921200  | 1.91388000  |
| C | -2.80150100 | 1.96981600  | -0.11702600 |
| C | -4.01963500 | 1.69615000  | 2.36271100  |
| H | -2.90053100 | -0.12745900 | 2.53675400  |
| C | -3.70097900 | 2.93643800  | 0.34434400  |
| H | -2.32799400 | 2.12668300  | -1.08122700 |
| C | -4.32040600 | 2.80764700  | 1.57573000  |
| C | -2.29305700 | -1.62781200 | 0.22347600  |
| C | -3.60327900 | -1.74730100 | -0.23208800 |
| C | -1.59405400 | -2.77894500 | 0.60450400  |
| C | -4.19165300 | -3.00487400 | -0.35720400 |
| H | -4.18456500 | -0.86303800 | -0.47974800 |
| C | -2.20489500 | -4.02204400 | 0.49866300  |
| H | -0.59046700 | -2.67180100 | 1.00911000  |
| C | -3.50150800 | -4.15171100 | 0.00474600  |
| H | -5.02977700 | 3.55359700  | 1.91953200  |
| H | -3.97095600 | -5.12655800 | -0.07721100 |
| H | 0.14596200  | 0.26683100  | 1.07341300  |
| C | -3.98646500 | 4.15039300  | -0.49497600 |
| C | -4.67984700 | 1.58015200  | 3.70879000  |
| C | -1.48450000 | -5.27387600 | 0.91346400  |
| C | -5.56090800 | -3.10244000 | -0.96700200 |
| F | -5.48826400 | -3.00960700 | -2.30654900 |
| F | -6.35842200 | -2.11068700 | -0.55141600 |
| F | -6.15911900 | -4.26346200 | -0.67958000 |
| F | -0.30418500 | -5.00888100 | 1.49082200  |
| F | -1.24546000 | -6.06792500 | -0.14368600 |

|   |             |             |             |
|---|-------------|-------------|-------------|
| F | -2.20890900 | -5.99208200 | 1.78063400  |
| F | -3.17018900 | 5.17181300  | -0.19271400 |
| F | -3.81953000 | 3.89620500  | -1.80413800 |
| F | -5.24067900 | 4.58519300  | -0.32162500 |
| F | -6.01491600 | 1.65013600  | 3.59589700  |
| F | -4.30721300 | 2.58040700  | 4.51925400  |
| F | -4.38220900 | 0.42826300  | 4.31930500  |
| C | 2.33224000  | -4.64959000 | -0.06624600 |
| C | 2.90730500  | -4.71871200 | 1.35047200  |
| C | 1.91785700  | -6.04154000 | -0.56456600 |
| H | 1.43720900  | -4.01975500 | -0.02570300 |
| H | 3.20133000  | -3.72806500 | 1.70285400  |
| H | 2.14703400  | -5.11236400 | 2.02937300  |
| H | 3.77227300  | -5.38855500 | 1.39861400  |
| H | 1.44130700  | -5.98596700 | -1.54758700 |
| H | 2.79432600  | -6.69297600 | -0.64608900 |
| H | 1.21438600  | -6.49761500 | 0.13416400  |
| C | 4.15193100  | 0.46019000  | 0.89944700  |
| C | 3.60416100  | -0.37853600 | -0.27252500 |
| H | 3.41584300  | 0.40832100  | 1.70830100  |
| C | 2.30658800  | -1.05293600 | 0.10072300  |
| H | 3.44772500  | 0.23426600  | -1.16655900 |
| C | 5.47375700  | -0.10920300 | 1.42445400  |
| C | 5.34294200  | -1.53064900 | 1.97228400  |
| H | 5.85438100  | 0.54314700  | 2.21947000  |
| H | 6.22568700  | -0.09062300 | 0.61997800  |
| C | 6.65913300  | -2.05907100 | 2.53558700  |
| H | 4.56626600  | -1.54436000 | 2.74635800  |
| H | 4.98873600  | -2.20863400 | 1.18391400  |
| H | 6.54910900  | -3.07565600 | 2.92273600  |
| H | 7.43658500  | -2.07480000 | 1.76454000  |
| H | 7.01711400  | -1.42560400 | 3.35301500  |
| O | 2.10295600  | -1.65671500 | 1.13084900  |
| H | 4.30912500  | -1.17352400 | -0.54813600 |
| C | 1.41957400  | 3.75497300  | -1.48784600 |
| C | 3.06780100  | 2.47685200  | -0.20215600 |
| C | 1.77756200  | 1.97779700  | -0.18467600 |
| N | 0.86460000  | 2.71849200  | -0.93177600 |
| O | 1.39194100  | 0.88224200  | 0.41217900  |
| S | 3.11700800  | 3.92815400  | -1.15075100 |
| C | 4.29833600  | 1.95199000  | 0.49423800  |
| H | 5.14382900  | 2.01137800  | -0.20991700 |
| C | 0.69037000  | 4.72904400  | -2.31442700 |
| C | -0.68710500 | 4.88059700  | -2.12674800 |

|   |              |             |              |
|---|--------------|-------------|--------------|
| C | 1. 34049800  | 5. 50200800 | -3. 28062700 |
| C | -1. 40347200 | 5. 78946600 | -2. 89493400 |
| H | -1. 17024800 | 4. 30021300 | -1. 34898400 |
| C | 0. 62164200  | 6. 41267000 | -4. 04669500 |
| H | 2. 40781400  | 5. 37664000 | -3. 44188100 |
| C | -0. 75090900 | 6. 55677000 | -3. 85806800 |
| H | -2. 46969800 | 5. 90213700 | -2. 73095500 |
| H | 1. 13356700  | 7. 00611600 | -4. 79739900 |
| H | -1. 31005600 | 7. 26836400 | -4. 45709300 |
| C | 4. 64831400  | 2. 80595200 | 1. 70375100  |
| C | 3. 69119200  | 3. 01431600 | 2. 70156200  |
| C | 5. 91170200  | 3. 37638000 | 1. 84964900  |
| C | 3. 99807300  | 3. 77168500 | 3. 82550600  |
| H | 2. 70015400  | 2. 58241000 | 2. 57878500  |
| C | 6. 22034800  | 4. 14146600 | 2. 97353600  |
| H | 6. 66060500  | 3. 21880400 | 1. 07694200  |
| C | 5. 26474800  | 4. 33903400 | 3. 96424800  |
| H | 3. 24667900  | 3. 92561900 | 4. 59363500  |
| H | 7. 20720700  | 4. 58296500 | 3. 07276400  |
| H | 5. 50283000  | 4. 93436700 | 4. 83995200  |

#### M4(RS)

|   |              |              |              |
|---|--------------|--------------|--------------|
| O | -1. 01685500 | -0. 10781900 | 1. 56403000  |
| N | 1. 67319100  | -1. 94593900 | -1. 67556000 |
| N | 0. 84992500  | -2. 00882300 | -2. 76052600 |
| N | 0. 04994000  | -0. 66458900 | -1. 19227700 |
| C | 3. 96523000  | -1. 94628200 | -2. 40156800 |
| H | 3. 73018900  | -1. 03336900 | -2. 93975200 |
| C | 5. 25091300  | -2. 46816000 | -2. 38727200 |
| H | 6. 04779600  | -1. 96930800 | -2. 92692600 |
| C | 5. 50111000  | -3. 62292900 | -1. 65147700 |
| H | 6. 50422400  | -4. 03525900 | -1. 61639900 |
| C | 4. 47671900  | -4. 25877800 | -0. 95579000 |
| H | 4. 70285300  | -5. 15792200 | -0. 39487800 |
| C | 3. 16671300  | -3. 76718900 | -0. 95607900 |
| C | 2. 96209700  | -2. 59090400 | -1. 68572600 |
| C | 1. 21531100  | -1. 13076500 | -0. 71788800 |
| C | -0. 13392400 | -1. 22703600 | -2. 42919600 |
| C | -1. 38596900 | -0. 76084300 | -3. 08554100 |
| H | -2. 11740700 | -1. 57271600 | -3. 11466800 |
| H | -1. 19643200 | -0. 44174800 | -4. 11146100 |
| C | -1. 80485500 | 0. 41192900  | -2. 16238200 |
| H | -2. 88149000 | 0. 45102600  | -1. 99504900 |
| H | -1. 52166000 | 1. 35992000  | -2. 62521700 |

|   |             |             |             |
|---|-------------|-------------|-------------|
| C | -1.02639900 | 0.28650900  | -0.82194200 |
| H | -0.54775300 | 1.23218800  | -0.57072100 |
| C | -1.81971500 | -0.19766600 | 0.43531400  |
| C | -3.00862900 | 0.76374300  | 0.61692600  |
| C | -4.33106300 | 0.36128700  | 0.75630100  |
| C | -2.70192700 | 2.12732700  | 0.74916600  |
| C | -5.33670200 | 1.30360700  | 0.98763300  |
| H | -4.60263200 | -0.68835200 | 0.71906300  |
| C | -3.71122000 | 3.05011100  | 0.97645200  |
| H | -1.66863900 | 2.47285200  | 0.70254900  |
| C | -5.04193300 | 2.65124100  | 1.09349100  |
| C | -2.20741600 | -1.66859800 | 0.25037500  |
| C | -3.11503800 | -2.11168800 | -0.71074900 |
| C | -1.54884500 | -2.62201800 | 1.03296800  |
| C | -3.33257800 | -3.47461000 | -0.90866100 |
| H | -3.67550100 | -1.40748200 | -1.31959700 |
| C | -1.80356900 | -3.97615700 | 0.84980100  |
| H | -0.83346300 | -2.27970700 | 1.77307000  |
| C | -2.68499800 | -4.42290000 | -0.13091100 |
| H | -5.82395500 | 3.37722000  | 1.28521300  |
| H | -2.86394900 | -5.48151600 | -0.28329500 |
| H | -0.21470900 | 0.49058600  | 1.39810700  |
| C | -3.38646600 | 4.51578700  | 1.06302300  |
| C | -6.75752900 | 0.82345200  | 1.08508000  |
| C | -1.16931100 | -4.97115400 | 1.78072200  |
| C | -4.25174200 | -3.88178500 | -2.02335100 |
| F | -3.70390900 | -3.59207400 | -3.22145700 |
| F | -5.41546900 | -3.22112700 | -1.96858300 |
| F | -4.51696500 | -5.19078600 | -2.01192800 |
| F | -0.00654600 | -4.52302300 | 2.26965100  |
| F | -0.92333100 | -6.14285900 | 1.16104500  |
| F | -1.96323100 | -5.24591100 | 2.82224900  |
| F | -2.11555300 | 4.72854400  | 1.40870600  |
| F | -3.58993100 | 5.12092800  | -0.12345700 |
| F | -4.17014500 | 5.14095300  | 1.95256300  |
| F | -6.85875600 | -0.25455400 | 1.87417200  |
| F | -7.23166000 | 0.46789700  | -0.12000200 |
| F | -7.57206700 | 1.76707300  | 1.57264700  |
| C | 2.02129100  | -4.49182100 | -0.26754500 |
| C | 2.49675500  | -5.50850300 | 0.76890500  |
| C | 1.14052800  | -5.18144500 | -1.32212200 |
| H | 1.41162700  | -3.74760400 | 0.26149100  |
| H | 3.13254300  | -5.04334200 | 1.52793700  |
| H | 1.63291700  | -5.94471900 | 1.27082500  |



|   |              |              |              |
|---|--------------|--------------|--------------|
| H | 3. 05082200  | -6. 32728300 | 0. 29807200  |
| H | 0. 74086000  | -4. 47268200 | -2. 05213600 |
| H | 1. 72246600  | -5. 93323600 | -1. 86536300 |
| H | 0. 30322500  | -5. 68477200 | -0. 83253900 |
| C | 3. 69307900  | 0. 50853100  | 1. 75937200  |
| C | 3. 33238400  | -0. 30163700 | 0. 49855400  |
| H | 2. 80063500  | 0. 54492400  | 2. 39085200  |
| C | 1. 99047900  | -0. 98303500 | 0. 60905100  |
| H | 3. 31151700  | 0. 33971900  | -0. 38716300 |
| C | 4. 80928000  | -0. 16504900 | 2. 56199400  |
| C | 4. 41503500  | -1. 54195800 | 3. 09753300  |
| H | 5. 07835700  | 0. 48028400  | 3. 41035700  |
| H | 5. 71394800  | -0. 25928100 | 1. 94613500  |
| C | 5. 52540900  | -2. 17297400 | 3. 93263000  |
| H | 3. 49655900  | -1. 45293300 | 3. 68853100  |
| H | 4. 16029100  | -2. 20749400 | 2. 26196800  |
| H | 5. 23434000  | -3. 15782800 | 4. 30723500  |
| H | 6. 43965200  | -2. 29392500 | 3. 34223300  |
| H | 5. 77149700  | -1. 54659500 | 4. 79594400  |
| O | 1. 59416700  | -1. 63220200 | 1. 54609500  |
| H | 4. 08421300  | -1. 07889400 | 0. 30599700  |
| C | 1. 26294000  | 4. 25756300  | -0. 26055500 |
| C | 2. 83425900  | 2. 66743100  | 0. 76225200  |
| C | 1. 53884900  | 2. 20752200  | 0. 58866500  |
| N | 0. 67575700  | 3. 12464200  | -0. 00730500 |
| O | 1. 08428000  | 1. 02633100  | 0. 89792600  |
| S | 2. 94485200  | 4. 30323600  | 0. 18426100  |
| C | 4. 02637200  | 1. 98496900  | 1. 38878800  |
| H | 4. 25530600  | 2. 48504700  | 2. 34175600  |
| C | 0. 59436700  | 5. 40279800  | -0. 90039800 |
| C | -0. 74329400 | 5. 28191600  | -1. 29116700 |
| C | 1. 26247700  | 6. 61091300  | -1. 12537500 |
| C | -1. 39785800 | 6. 34852000  | -1. 89363900 |
| H | -1. 25873700 | 4. 34513400  | -1. 10706800 |
| C | 0. 60691000  | 7. 67451700  | -1. 73322400 |
| H | 2. 29942200  | 6. 72371000  | -0. 82050500 |
| C | -0. 72495600 | 7. 54684600  | -2. 12014500 |
| H | -2. 44002800 | 6. 24504000  | -2. 17659900 |
| H | 1. 13603100  | 8. 60684100  | -1. 90158500 |
| H | -1. 23722400 | 8. 37949000  | -2. 59130800 |
| C | 5. 28801700  | 2. 08534000  | 0. 53528000  |
| C | 5. 24597000  | 2. 05185900  | -0. 86238400 |
| C | 6. 53886900  | 2. 18244400  | 1. 15294000  |
| C | 6. 41651700  | 2. 08143300  | -1. 61568800 |

|   |             |             |              |
|---|-------------|-------------|--------------|
| H | 4. 28223500 | 2. 03601900 | -1. 36432000 |
| C | 7. 71164400 | 2. 21561800 | 0. 40472800  |
| H | 6. 59043900 | 2. 23463200 | 2. 23786700  |
| C | 7. 65465700 | 2. 15816600 | -0. 98519200 |
| H | 6. 35883100 | 2. 06097700 | -2. 69989900 |
| H | 8. 67021000 | 2. 29507600 | 0. 90800100  |
| H | 8. 56715900 | 2. 18946500 | -1. 57197200 |

**M4(SR)**

|   |              |              |              |
|---|--------------|--------------|--------------|
| O | 1. 48089500  | 1. 14719600  | -0. 73336000 |
| N | -0. 64343300 | -1. 01679500 | 2. 72584600  |
| N | 0. 39654400  | -1. 56127100 | 3. 43279900  |
| N | 1. 07445200  | 0. 04699500  | 2. 08629900  |
| C | -2. 55204100 | -0. 90011300 | 4. 17499700  |
| H | -1. 95994100 | -0. 22327800 | 4. 78348600  |
| C | -3. 86019800 | -1. 21574100 | 4. 51292500  |
| H | -4. 31218200 | -0. 79012400 | 5. 40200900  |
| C | -4. 57767800 | -2. 07436700 | 3. 68540100  |
| H | -5. 60680600 | -2. 32306200 | 3. 92372000  |
| C | -3. 98448700 | -2. 62881300 | 2. 55589600  |
| H | -4. 56497800 | -3. 30307400 | 1. 93790200  |
| C | -2. 66299800 | -2. 34291200 | 2. 18948900  |
| C | -1. 98957600 | -1. 44196000 | 3. 02340000  |
| C | -0. 25491100 | -0. 02156900 | 1. 91864200  |
| C | 1. 42861900  | -0. 89604000 | 3. 00906700  |
| C | 2. 88575200  | -0. 85655100 | 3. 31842600  |
| H | 3. 37346600  | -1. 77145700 | 2. 97480400  |
| H | 3. 05243700  | -0. 77403100 | 4. 39376700  |
| C | 3. 33738700  | 0. 41882000  | 2. 55260800  |
| H | 4. 29131500  | 0. 28544000  | 2. 04137700  |
| H | 3. 47311800  | 1. 23632500  | 3. 26331500  |
| C | 2. 21209900  | 0. 82103000  | 1. 55339300  |
| H | 1. 95152200  | 1. 87688000  | 1. 63194500  |
| C | 2. 45462100  | 0. 52767500  | 0. 02465400  |
| C | 3. 79821500  | 1. 18434400  | -0. 35024200 |
| C | 4. 92459800  | 0. 51797000  | -0. 81360100 |
| C | 3. 84183500  | 2. 58444800  | -0. 26456600 |
| C | 6. 08450900  | 1. 22873700  | -1. 14066400 |
| H | 4. 92332300  | -0. 55637400 | -0. 95986900 |
| C | 4. 99702600  | 3. 27651400  | -0. 58220000 |
| H | 2. 94673500  | 3. 13049500  | 0. 01510400  |
| C | 6. 14005800  | 2. 60400000  | -1. 01901400 |
| C | 2. 41433100  | -0. 98989700 | -0. 21167900 |
| C | 3. 34007800  | -1. 87802100 | 0. 33496000  |

|   |              |              |              |
|---|--------------|--------------|--------------|
| C | 1. 35986100  | -1. 51302900 | -0. 96564200 |
| C | 3. 21180500  | -3. 25224200 | 0. 14554900  |
| H | 4. 18973400  | -1. 51889800 | 0. 90814100  |
| C | 1. 26090600  | -2. 88498700 | -1. 17349100 |
| H | 0. 62810500  | -0. 82651100 | -1. 37875500 |
| C | 2. 17729200  | -3. 77292500 | -0. 61603800 |
| H | 7. 04217700  | 3. 14848700  | -1. 27580700 |
| H | 2. 08448000  | -4. 84210200 | -0. 77046800 |
| H | 0. 70923800  | 1. 54342500  | -0. 14330400 |
| C | 5. 05449800  | 4. 77518200  | -0. 47815900 |
| C | 7. 28083900  | 0. 44568800  | -1. 60355900 |
| C | 0. 18537200  | -3. 41381100 | -2. 08168600 |
| C | 4. 22856500  | -4. 14049800 | 0. 80058900  |
| F | 4. 05655800  | -5. 42814300 | 0. 49287800  |
| F | 4. 16755100  | -4. 03302000 | 2. 14384500  |
| F | 5. 47489400  | -3. 79344500 | 0. 45010100  |
| F | -0. 91926500 | -2. 66067600 | -2. 03313300 |
| F | -0. 16558300 | -4. 67248600 | -1. 75266600 |
| F | 0. 59266700  | -3. 44795900 | -3. 35680300 |
| F | 3. 88440100  | 5. 30155200  | -0. 10048700 |
| F | 5. 97933900  | 5. 16057700  | 0. 41573000  |
| F | 5. 39418800  | 5. 33146300  | -1. 64894900 |
| F | 6. 96349400  | -0. 37952000 | -2. 61044900 |
| F | 7. 76641000  | -0. 32089800 | -0. 61378900 |
| F | 8. 27297100  | 1. 24052300  | -2. 02126200 |
| C | -1. 99313200 | -3. 01594800 | 1. 00124100  |
| C | -2. 98388300 | -3. 76197700 | 0. 10867800  |
| C | -0. 91399100 | -3. 99861800 | 1. 48792100  |
| H | -1. 52349800 | -2. 23304600 | 0. 39115100  |
| H | -3. 79055400 | -3. 11158100 | -0. 23647800 |
| H | -2. 45903700 | -4. 13492400 | -0. 77257100 |
| H | -3. 41154100 | -4. 62671800 | 0. 62908800  |
| H | -0. 10920900 | -3. 50806700 | 2. 04034900  |
| H | -1. 36068900 | -4. 75436400 | 2. 14265700  |
| H | -0. 47576500 | -4. 51222200 | 0. 62823800  |
| C | -2. 96880400 | 2. 73662200  | 1. 31910400  |
| C | -2. 32860800 | 1. 44014200  | 1. 84546600  |
| H | -2. 33741800 | 3. 57762300  | 1. 63245200  |
| C | -1. 06975100 | 1. 00567300  | 1. 07179700  |
| H | -3. 07086900 | 0. 63378600  | 1. 84541800  |
| C | -4. 36000300 | 2. 89728500  | 1. 94158400  |
| C | -4. 38787300 | 2. 78593300  | 3. 46746900  |
| H | -5. 03192900 | 2. 13521800  | 1. 51583500  |
| H | -4. 77048400 | 3. 87251800  | 1. 65791100  |

|   |             |             |             |
|---|-------------|-------------|-------------|
| C | -5.76522600 | 3.11408300  | 4.03748900  |
| H | -4.10339800 | 1.77233700  | 3.77597200  |
| H | -3.63806500 | 3.46613900  | 3.89370200  |
| H | -5.78403000 | 3.02130900  | 5.12666900  |
| H | -6.06137500 | 4.13603200  | 3.78178400  |
| H | -6.52325800 | 2.43779500  | 3.62964500  |
| O | -0.27586600 | 2.00445900  | 0.76060600  |
| H | -2.03427500 | 1.60176100  | 2.88819800  |
| C | -4.24025100 | -0.59246200 | -1.89301600 |
| C | -3.37419000 | 1.42815700  | -0.80254800 |
| C | -2.62528100 | 0.28472300  | -0.69370100 |
| N | -3.10814500 | -0.83815700 | -1.29752200 |
| O | -1.42769600 | 0.14363900  | -0.07052300 |
| S | -4.78312600 | 1.05352000  | -1.74139300 |
| C | -2.96556200 | 2.76502500  | -0.23920600 |
| H | -1.90521200 | 2.85748200  | -0.49761100 |
| C | -4.99093700 | -1.60293400 | -2.65318300 |
| C | -4.32244000 | -2.75411600 | -3.08738200 |
| C | -6.34801100 | -1.44259500 | -2.94748100 |
| C | -5.00887200 | -3.72810300 | -3.80143800 |
| H | -3.26597000 | -2.85747700 | -2.86217900 |
| C | -7.02783000 | -2.41770200 | -3.66824800 |
| H | -6.87771500 | -0.55936300 | -2.60007800 |
| C | -6.36144400 | -3.56367100 | -4.09475800 |
| H | -4.48405200 | -4.61693400 | -4.13692100 |
| H | -8.08162600 | -2.28502700 | -3.89062800 |
| H | -6.89385000 | -4.32594100 | -4.65433700 |
| C | -3.66087800 | 3.97751500  | -0.82702200 |
| C | -5.05250500 | 4.10766900  | -0.90722800 |
| C | -2.87413100 | 5.03756900  | -1.28499700 |
| C | -5.63416100 | 5.25366800  | -1.44159100 |
| H | -5.69538600 | 3.31294100  | -0.53997600 |
| C | -3.45140800 | 6.18834700  | -1.81371600 |
| H | -1.79215000 | 4.95234400  | -1.22802600 |
| C | -4.83576100 | 6.29862900  | -1.89759400 |
| H | -6.71552600 | 5.32982200  | -1.49815200 |
| H | -2.81719700 | 6.99588200  | -2.16562300 |
| H | -5.28951800 | 7.19171600  | -2.31501000 |

**M4(SS)**

|   |             |             |             |
|---|-------------|-------------|-------------|
| O | 1.04648200  | -0.96444300 | 0.24695000  |
| N | -1.35393800 | 0.34855800  | -3.25906600 |
| N | -0.59404000 | 1.42514900  | -3.62867400 |
| N | 0.58248200  | -0.04871900 | -2.47938000 |

|   |             |             |             |
|---|-------------|-------------|-------------|
| C | -3.01353200 | -0.68210700 | -4.67782300 |
| H | -2.20659200 | -1.25331900 | -5.12760200 |
| C | -4.33011800 | -0.85114600 | -5.08452400 |
| H | -4.57192800 | -1.56672300 | -5.86237300 |
| C | -5.32739000 | -0.08755000 | -4.48331600 |
| H | -6.36076700 | -0.20985200 | -4.79112800 |
| C | -5.01273700 | 0.83121500  | -3.48755500 |
| H | -5.80752400 | 1.40861800  | -3.02755800 |
| C | -3.69901300 | 1.02230300  | -3.04699400 |
| C | -2.72627500 | 0.23862800  | -3.67492000 |
| C | -0.65907000 | -0.54751500 | -2.55976300 |
| C | 0.57847800  | 1.14933000  | -3.13900300 |
| C | 1.95155700  | 1.72718000  | -3.20978400 |
| H | 2.06644300  | 2.54231300  | -2.48935000 |
| H | 2.17269200  | 2.11027800  | -4.20642000 |
| C | 2.80992500  | 0.48925300  | -2.83360200 |
| H | 3.71770400  | 0.78160000  | -2.30646400 |
| H | 3.10178800  | -0.04212000 | -3.74393600 |
| C | 1.91242600  | -0.44669400 | -1.97109900 |
| H | 2.03998000  | -1.50755900 | -2.19036200 |
| C | 2.03572100  | -0.26513000 | -0.41475000 |
| C | 3.34615600  | -0.91068600 | 0.06302900  |
| C | 4.35386000  | -1.40223600 | -0.75410900 |
| C | 3.49220100  | -1.03024400 | 1.45309500  |
| C | 5.49570000  | -1.98917700 | -0.19596200 |
| H | 4.28839300  | -1.35884000 | -1.83684700 |
| C | 4.62569200  | -1.60903400 | 1.99335700  |
| H | 2.69143700  | -0.68190300 | 2.09615300  |
| C | 5.64629600  | -2.09565400 | 1.17262000  |
| C | 2.04396900  | 1.24545900  | -0.09998200 |
| C | 0.83691200  | 1.95774900  | 0.00223200  |
| C | 3.24477900  | 1.94813300  | -0.02090700 |
| C | 0.86869500  | 3.34428500  | 0.11150900  |
| H | -0.12315900 | 1.43887000  | -0.00975000 |
| C | 3.25658900  | 3.33728300  | 0.09881400  |
| H | 4.19365400  | 1.42003500  | -0.06088400 |
| C | 2.07110300  | 4.04974300  | 0.15015800  |
| H | 6.53256000  | -2.55315300 | 1.59833900  |
| H | 2.07688700  | 5.13183100  | 0.22628400  |
| H | 0.08099600  | -0.63539200 | 0.11149700  |
| C | 4.80288800  | -1.70889400 | 3.48346700  |
| C | 6.54795200  | -2.50741400 | -1.13436100 |
| C | 4.58735200  | 4.03438000  | 0.12992700  |
| C | -0.39491400 | 4.15813900  | 0.17796100  |

|   |             |             |             |
|---|-------------|-------------|-------------|
| F | -1.49279200 | 3.41890200  | 0.02229700  |
| F | -0.40384700 | 5.10498200  | -0.77693100 |
| F | -0.49617100 | 4.80130200  | 1.35426100  |
| F | 5.34748400  | 3.59493000  | 1.14040500  |
| F | 4.45951100  | 5.35936100  | 0.25787700  |
| F | 5.27405500  | 3.80023600  | -1.00187900 |
| F | 3.68068800  | -1.40967000 | 4.14472100  |
| F | 5.17663500  | -2.94538000 | 3.84457900  |
| F | 5.76221700  | -0.87430800 | 3.91196600  |
| F | 6.06907400  | -3.49190800 | -1.90958700 |
| F | 7.61475200  | -2.98342600 | -0.48468700 |
| F | 6.97281300  | -1.53923900 | -1.96322400 |
| C | -3.34876700 | 2.04036900  | -1.97934600 |
| C | -4.41999600 | 2.14267200  | -0.89253800 |
| C | -3.11595200 | 3.40907500  | -2.63897400 |
| H | -2.42092100 | 1.71450000  | -1.49137400 |
| H | -4.65347200 | 1.15982700  | -0.46936200 |
| H | -4.05277400 | 2.78000900  | -0.08447700 |
| H | -5.34221800 | 2.59038700  | -1.27799300 |
| H | -2.32368200 | 3.36155700  | -3.38981700 |
| H | -4.03483100 | 3.74828900  | -3.12980600 |
| H | -2.83675700 | 4.14638100  | -1.88326900 |
| C | -2.48602200 | -3.13490400 | -0.45032500 |
| C | -2.46050100 | -2.28582900 | -1.74656500 |
| H | -1.49578200 | -3.06792700 | 0.01690800  |
| C | -1.03802700 | -1.93562800 | -2.08889300 |
| H | -3.05181300 | -1.37551300 | -1.63586800 |
| C | -2.78068000 | -4.60968300 | -0.75928500 |
| C | -1.78035700 | -5.28904400 | -1.69309500 |
| H | -3.79246600 | -4.68469200 | -1.18913100 |
| H | -2.80684700 | -5.17157900 | 0.18021600  |
| C | -2.12911600 | -6.75825700 | -1.91764000 |
| H | -1.74101100 | -4.77134100 | -2.65971000 |
| H | -0.77459000 | -5.19821300 | -1.26965200 |
| H | -1.41221900 | -7.24257100 | -2.58578000 |
| H | -2.13030100 | -7.30795900 | -0.97143600 |
| H | -3.12496900 | -6.86291700 | -2.36078300 |
| O | -0.10968800 | -2.70880900 | -2.04207200 |
| H | -2.87814400 | -2.85478400 | -2.58875800 |
| C | -3.40684700 | 1.04537700  | 2.07628900  |
| C | -3.29075800 | -1.12320700 | 0.93153800  |
| C | -2.28146800 | -0.22354500 | 0.62489400  |
| N | -2.37679200 | 0.99275200  | 1.28942700  |
| O | -1.30176500 | -0.38024400 | -0.23222600 |

|   |             |             |            |
|---|-------------|-------------|------------|
| S | -4.37238500 | -0.40149600 | 2.09122200 |
| C | -3.51945200 | -2.57153100 | 0.55717800 |
| H | -4.50959300 | -2.66151000 | 0.08112000 |
| C | -3.76164500 | 2.23515500  | 2.86653100 |
| C | -2.82713000 | 3.27066200  | 2.97734000 |
| C | -5.00698400 | 2.36782200  | 3.48794800 |
| C | -3.13651300 | 4.41956600  | 3.69320000 |
| H | -1.86382300 | 3.15174800  | 2.49773500 |
| C | -5.30994800 | 3.51610100  | 4.21088400 |
| H | -5.74622100 | 1.57651800  | 3.39622500 |
| C | -4.37795600 | 4.54606900  | 4.31420500 |
| H | -2.40347100 | 5.21694800  | 3.76618400 |
| H | -6.27975300 | 3.61010200  | 4.68896800 |
| H | -4.61938400 | 5.44294800  | 4.87559000 |
| C | -3.54703700 | -3.43049600 | 1.81612600 |
| C | -2.45237800 | -3.42177500 | 2.68564300 |
| C | -4.64032900 | -4.24084600 | 2.11654500 |
| C | -2.44891300 | -4.21801500 | 3.82427800 |
| H | -1.60831800 | -2.77092300 | 2.46786600 |
| C | -4.64245900 | -5.03625200 | 3.26181600 |
| H | -5.49690800 | -4.25035600 | 1.44660700 |
| C | -3.54563300 | -5.02860700 | 4.11623900 |
| H | -1.59205500 | -4.20216200 | 4.49041200 |
| H | -5.50308300 | -5.65902900 | 3.48551500 |
| H | -3.54498100 | -5.64580200 | 5.00893400 |

#### TS5(RR)

|   |             |            |             |
|---|-------------|------------|-------------|
| O | -0.40959200 | 0.59905800 | -1.33801600 |
| N | 2.73398600  | 2.08267100 | 1.24650400  |
| N | 2.01781600  | 2.89093400 | 2.08144500  |
| N | 0.74392900  | 1.36171700 | 1.11684700  |
| C | 4.82479300  | 1.47912500 | 2.25727500  |
| H | 4.22273100  | 1.02144600 | 3.03855000  |
| C | 6.21103300  | 1.42810700 | 2.24698800  |
| H | 6.74265100  | 0.93056300 | 3.05063300  |
| C | 6.90992900  | 2.01172000 | 1.18933100  |
| H | 7.99429600  | 1.96694000 | 1.16875300  |
| C | 6.23077900  | 2.64585400 | 0.15628800  |
| H | 6.79308200  | 3.09628300 | -0.65665100 |
| C | 4.83198800  | 2.72453500 | 0.13570900  |
| C | 4.17171100  | 2.11971300 | 1.20480500  |
| C | 1.98588700  | 1.14454800 | 0.68001600  |
| C | 0.81353300  | 2.41580900 | 1.98883200  |
| C | -0.49882500 | 2.65443500 | 2.64755700  |

|   |             |             |             |
|---|-------------|-------------|-------------|
| H | -1.00081000 | 3.52649200  | 2.21743400  |
| H | -0.37665200 | 2.81536300  | 3.71886900  |
| C | -1.24036000 | 1.33051100  | 2.32637900  |
| H | -2.30824900 | 1.49676500  | 2.18469400  |
| H | -1.10998000 | 0.63257300  | 3.15850200  |
| C | -0.57447200 | 0.70455900  | 1.06386400  |
| H | -0.42052600 | -0.37503200 | 1.17274300  |
| C | -1.27027300 | 0.97981400  | -0.30249900 |
| C | -2.60819800 | 0.24895400  | -0.40777900 |
| C | -3.27127500 | 0.32986100  | -1.63899000 |
| C | -3.19664100 | -0.47184300 | 0.62404200  |
| C | -4.51294700 | -0.26045900 | -1.80404100 |
| H | -2.79936200 | 0.85511900  | -2.46341400 |
| C | -4.46641500 | -1.03052600 | 0.45711800  |
| H | -2.69815400 | -0.62105300 | 1.57636200  |
| C | -5.13644600 | -0.92722400 | -0.74775400 |
| C | -1.44463700 | 2.49021400  | -0.45427100 |
| C | -2.57893400 | 3.15999200  | -0.00364100 |
| C | -0.37348500 | 3.22971800  | -0.96452400 |
| C | -2.62062500 | 4.55281700  | -0.01992200 |
| H | -3.43940300 | 2.60488700  | 0.36089400  |
| C | -0.42762600 | 4.61782700  | -0.96709200 |
| H | 0.49339900  | 2.70582400  | -1.35917600 |
| C | -1.54562400 | 5.29547400  | -0.48943600 |
| H | -6.12067700 | -1.36631900 | -0.87251000 |
| H | -1.58259400 | 6.37911300  | -0.49331300 |
| H | -0.34526000 | -0.36953600 | -1.44461400 |
| C | -5.11421400 | -1.66778100 | 1.65492600  |
| C | -5.24803600 | -0.16487100 | -3.11236300 |
| C | 0.78797200  | 5.39471000  | -1.38929400 |
| C | -3.81046900 | 5.24339300  | 0.58454700  |
| F | -3.71259600 | 5.26075900  | 1.92523100  |
| F | -4.95312200 | 4.61352500  | 0.28493100  |
| F | -3.91652600 | 6.51215600  | 0.17585500  |
| F | 1.48733000  | 4.75579800  | -2.33913500 |
| F | 1.61887200  | 5.56957100  | -0.34713500 |
| F | 0.47281100  | 6.60807700  | -1.85449000 |
| F | -4.28686400 | -2.51808300 | 2.27105800  |
| F | -5.44640300 | -0.73002200 | 2.56047500  |
| F | -6.23587300 | -2.32376800 | 1.33629100  |
| F | -6.34671800 | 0.59489100  | -2.99188000 |
| F | -5.65573900 | -1.37426800 | -3.52461500 |
| F | -4.49206900 | 0.36578200  | -4.07831300 |
| C | 4.10780600  | 3.44469500  | -0.98466000 |



|   |              |              |              |
|---|--------------|--------------|--------------|
| C | 4. 36603000  | 2. 77481900  | -2. 33819300 |
| C | 4. 50659200  | 4. 92468200  | -1. 01671300 |
| H | 3. 03201000  | 3. 39786900  | -0. 78287000 |
| H | 4. 06927200  | 1. 72402100  | -2. 32129300 |
| H | 3. 78985700  | 3. 28412600  | -3. 11597500 |
| H | 5. 42567000  | 2. 83854000  | -2. 60778800 |
| H | 4. 30635800  | 5. 41190400  | -0. 05931500 |
| H | 5. 57207700  | 5. 03481500  | -1. 24349200 |
| H | 3. 94005700  | 5. 44454800  | -1. 79306800 |
| C | 3. 49956500  | -2. 24849800 | -0. 38155700 |
| C | 2. 90461800  | -1. 13477500 | 0. 46981200  |
| H | 3. 35636800  | -2. 00668800 | -1. 44463200 |
| C | 2. 49784500  | 0. 04253100  | -0. 22782700 |
| H | 3. 48317000  | -0. 87959400 | 1. 36660900  |
| C | 5. 01940200  | -2. 32848800 | -0. 17672000 |
| C | 5. 73680700  | -1. 04900500 | -0. 60804200 |
| H | 5. 42575700  | -3. 17587000 | -0. 74168600 |
| H | 5. 22660200  | -2. 52850700 | 0. 88584500  |
| C | 7. 24431600  | -1. 12067600 | -0. 38667200 |
| H | 5. 52228100  | -0. 86148800 | -1. 66816600 |
| H | 5. 33399600  | -0. 18997200 | -0. 05728700 |
| H | 7. 73740500  | -0. 20483600 | -0. 72482000 |
| H | 7. 47444700  | -1. 24975200 | 0. 67653600  |
| H | 7. 68537800  | -1. 96335200 | -0. 92860900 |
| O | 2. 40956200  | 0. 23927100  | -1. 43992200 |
| H | 1. 59113300  | -1. 43150100 | -1. 83754200 |
| C | -1. 11155600 | -3. 88641700 | 0. 13983000  |
| C | 1. 29736100  | -3. 53730200 | -0. 19759600 |
| C | 0. 44244700  | -2. 76990200 | -0. 94540600 |
| N | -0. 89501800 | -2. 94929700 | -0. 74128300 |
| O | 0. 71951800  | -1. 85590900 | -1. 91633100 |
| S | 0. 33427400  | -4. 58452600 | 0. 79108400  |
| C | 2. 80550900  | -3. 61276100 | -0. 11728700 |
| H | 3. 05516500  | -3. 89034100 | 0. 91678100  |
| C | -2. 45567600 | -4. 36962900 | 0. 48694500  |
| C | -3. 51732600 | -4. 06459000 | -0. 37285200 |
| C | -2. 69201500 | -5. 14638000 | 1. 62381700  |
| C | -4. 79358700 | -4. 53724100 | -0. 09729700 |
| H | -3. 31564200 | -3. 46369100 | -1. 25429700 |
| C | -3. 97166300 | -5. 61785000 | 1. 89436500  |
| H | -1. 87523500 | -5. 37372700 | 2. 30401900  |
| C | -5. 02498300 | -5. 31491300 | 1. 03578600  |
| H | -5. 61233500 | -4. 29838200 | -0. 76942700 |
| H | -4. 14833400 | -6. 21687800 | 2. 78176800  |

|   |             |             |             |
|---|-------------|-------------|-------------|
| H | -6.02416600 | -5.67999800 | 1.25019400  |
| C | 3.34053200  | -4.69785800 | -1.03840200 |
| C | 3.00516800  | -4.69150000 | -2.39552500 |
| C | 4.19171200  | -5.69191200 | -0.55808200 |
| C | 3.51948800  | -5.65700900 | -3.25336700 |
| H | 2.32445500  | -3.93157900 | -2.77438600 |
| C | 4.70548800  | -6.66314100 | -1.41513000 |
| H | 4.45653400  | -5.70247500 | 0.49655500  |
| C | 4.37192800  | -6.64608200 | -2.76527300 |
| H | 3.24988600  | -5.64238800 | -4.30473500 |
| H | 5.36570900  | -7.43184100 | -1.02592500 |
| H | 4.76956200  | -7.40120700 | -3.43561400 |
| H | 1.85256300  | -1.43538900 | 1.23409900  |
| C | 1.30262200  | -1.01614000 | 3.25636000  |
| O | 1.00294500  | -1.69605100 | 2.19708700  |
| O | 2.01266600  | -0.00348700 | 3.27134000  |
| C | 0.70273100  | -1.55819100 | 4.54288300  |
| H | 1.18971100  | -2.50597100 | 4.78751100  |
| H | 0.84683500  | -0.85165200 | 5.35963900  |
| H | -0.35883900 | -1.77350500 | 4.39832900  |

**TS5(RS)**

|   |             |             |             |
|---|-------------|-------------|-------------|
| O | -0.19066800 | -0.07177000 | -0.42027800 |
| N | 1.24518800  | 3.59798300  | 1.05054500  |
| N | 0.16715200  | 4.10835600  | 1.72185300  |
| N | -0.02718000 | 1.94054400  | 1.36229400  |
| C | 3.47639100  | 4.35390300  | 1.56749000  |
| H | 3.42568500  | 3.72463800  | 2.45126600  |
| C | 4.60292800  | 5.10740600  | 1.26930000  |
| H | 5.46738000  | 5.07550000  | 1.92277000  |
| C | 4.60696300  | 5.90353200  | 0.12486900  |
| H | 5.48262300  | 6.49670700  | -0.11796200 |
| C | 3.49867500  | 5.94265300  | -0.71224400 |
| H | 3.52181600  | 6.56560000  | -1.60157600 |
| C | 2.34865300  | 5.19244000  | -0.44387700 |
| C | 2.37977800  | 4.41276600  | 0.71136800  |
| C | 1.14950500  | 2.28747700  | 0.83911800  |
| C | -0.58763100 | 3.06430800  | 1.90254500  |
| C | -1.86068200 | 2.73320300  | 2.61116400  |
| H | -2.72640500 | 3.00608300  | 2.00022200  |
| H | -1.93365100 | 3.25434800  | 3.56581600  |
| C | -1.70708300 | 1.19645500  | 2.78201400  |
| H | -2.66020000 | 0.66711600  | 2.76918000  |
| H | -1.21751700 | 0.99737000  | 3.73789300  |

|   |             |             |             |
|---|-------------|-------------|-------------|
| C | -0.74442700 | 0.70247900  | 1.67638100  |
| H | -0.00340900 | 0.01429600  | 2.06414200  |
| C | -1.33159400 | 0.06091900  | 0.39268000  |
| C | -1.86788800 | -1.33500000 | 0.73089900  |
| C | -3.04817800 | -1.85336700 | 0.20137300  |
| C | -1.06022700 | -2.17595300 | 1.50809700  |
| C | -3.44115600 | -3.15689500 | 0.50145100  |
| H | -3.66410700 | -1.26471100 | -0.47112800 |
| C | -1.48461400 | -3.45880000 | 1.82517400  |
| H | -0.07235300 | -1.86293800 | 1.84275300  |
| C | -2.68319100 | -3.96454300 | 1.33618500  |
| C | -2.33358000 | 1.01821700  | -0.24968300 |
| C | -3.63160100 | 1.17644900  | 0.23894900  |
| C | -1.90072600 | 1.84503200  | -1.29063100 |
| C | -4.47294500 | 2.14803900  | -0.29343700 |
| H | -4.00608100 | 0.54087700  | 1.03599300  |
| C | -2.76189600 | 2.79808700  | -1.82653700 |
| H | -0.89083800 | 1.73151600  | -1.67720500 |
| C | -4.05116500 | 2.96556700  | -1.33348300 |
| H | -2.99138100 | -4.97910700 | 1.55898000  |
| H | -4.71717300 | 3.70898900  | -1.75728200 |
| H | 1.83747100  | 0.59308400  | -2.57958700 |
| C | -0.61707700 | -4.27649300 | 2.74237600  |
| C | -4.70960400 | -3.67555300 | -0.11463700 |
| C | -2.27445100 | 3.71050000  | -2.91810000 |
| C | -5.81621200 | 2.35985700  | 0.34552300  |
| F | -5.68952300 | 3.08406200  | 1.47162900  |
| F | -6.38730300 | 1.19941500  | 0.69080500  |
| F | -6.65884200 | 3.01405100  | -0.45910900 |
| F | -1.73504400 | 4.83137900  | -2.39956100 |
| F | -3.27223000 | 4.09638400  | -3.72191500 |
| F | -1.33236200 | 3.13493900  | -3.66935800 |
| F | 0.67661500  | -4.19824300 | 2.40436300  |
| F | -0.70920000 | -3.83280600 | 4.00940200  |
| F | -0.96615700 | -5.56927400 | 2.75141300  |
| F | -5.79373800 | -3.11349900 | 0.44126200  |
| F | -4.83048700 | -5.00160500 | 0.02043700  |
| F | -4.76004100 | -3.39375900 | -1.42716200 |
| C | 1.14956100  | 5.24755500  | -1.36854800 |
| C | 1.52730800  | 4.80610700  | -2.78594500 |
| C | 0.54018700  | 6.65429100  | -1.35614500 |
| H | 0.39017700  | 4.55032900  | -0.99717000 |
| H | 1.95661900  | 3.80147200  | -2.77200100 |
| H | 0.63812900  | 4.79772300  | -3.42043700 |

|   |              |              |              |
|---|--------------|--------------|--------------|
| H | 2. 25511900  | 5. 49208200  | -3. 23140700 |
| H | 0. 23762200  | 6. 94112100  | -0. 34529000 |
| H | 1. 26321800  | 7. 39283900  | -1. 71764900 |
| H | -0. 33551600 | 6. 69144300  | -2. 00745000 |
| C | 4. 19728800  | -0. 09171700 | 0. 16886400  |
| C | 2. 99708300  | 0. 63241200  | 0. 77220300  |
| H | 5. 00579200  | 0. 64146600  | 0. 02252200  |
| C | 2. 15591300  | 1. 48465200  | 0. 00949500  |
| H | 3. 22571700  | 1. 12905100  | 1. 72164300  |
| C | 4. 72887700  | -1. 15056600 | 1. 14831500  |
| C | 5. 18496700  | -0. 58756200 | 2. 49484000  |
| H | 5. 57576600  | -1. 66813700 | 0. 68166500  |
| H | 3. 95195600  | -1. 90052700 | 1. 34259200  |
| C | 5. 76505600  | -1. 67764700 | 3. 39229700  |
| H | 5. 93502900  | 0. 19716000  | 2. 32838400  |
| H | 4. 34536500  | -0. 10873200 | 3. 01299100  |
| H | 6. 06987800  | -1. 28147700 | 4. 36483100  |
| H | 5. 02459500  | -2. 46611000 | 3. 56365400  |
| H | 6. 63978800  | -2. 14362700 | 2. 92801100  |
| O | 2. 05991300  | 1. 71436400  | -1. 20027400 |
| H | -0. 36125800 | -0. 69466800 | -1. 14909200 |
| C | 0. 80483100  | -3. 10676600 | -1. 36134100 |
| C | 2. 67325600  | -1. 50826400 | -1. 36669000 |
| C | 1. 63288600  | -1. 25339400 | -2. 22729500 |
| N | 0. 59475600  | -2. 14409800 | -2. 22043000 |
| O | 1. 51098700  | -0. 19530700 | -3. 05208000 |
| S | 2. 27728100  | -2. 93705900 | -0. 46119500 |
| C | 3. 92235000  | -0. 67667800 | -1. 25073500 |
| H | 3. 72195100  | 0. 19051900  | -1. 88654800 |
| C | -0. 12654000 | -4. 23308600 | -1. 18558400 |
| C | -1. 33073500 | -4. 22944800 | -1. 90071600 |
| C | 0. 17021500  | -5. 31647700 | -0. 35167100 |
| C | -2. 22096400 | -5. 28931300 | -1. 77717300 |
| H | -1. 54758100 | -3. 39017300 | -2. 55326900 |
| C | -0. 72972500 | -6. 36859400 | -0. 22122300 |
| H | 1. 10360600  | -5. 33698400 | 0. 20319700  |
| C | -1. 92763300 | -6. 35830200 | -0. 93242400 |
| H | -3. 15495800 | -5. 27323300 | -2. 32909800 |
| H | -0. 49290400 | -7. 19624100 | 0. 43917100  |
| H | -2. 63080900 | -7. 17881600 | -0. 83052600 |
| C | 5. 18520500  | -1. 31373800 | -1. 82785300 |
| C | 5. 33780800  | -2. 68078100 | -2. 05736000 |
| C | 6. 25750000  | -0. 46823300 | -2. 13714100 |
| C | 6. 53266600  | -3. 19003700 | -2. 56447200 |

|   |            |             |             |
|---|------------|-------------|-------------|
| H | 4.51888500 | -3.36124000 | -1.85308400 |
| C | 7.44989400 | -0.97190000 | -2.64234800 |
| H | 6.14837000 | 0.60381200  | -1.98882500 |
| C | 7.59408400 | -2.34116500 | -2.85501300 |
| H | 6.62747200 | -4.25785500 | -2.73567400 |
| H | 8.26460000 | -0.29434800 | -2.87860400 |
| H | 8.52260600 | -2.73917700 | -3.25144000 |
| C | 1.77670700 | -0.38672700 | 3.50679800  |
| O | 1.59836400 | 0.83399300  | 3.57217200  |
| O | 1.83372700 | -1.05203400 | 2.38934800  |
| H | 2.23110700 | -0.24588000 | 1.45522000  |
| C | 1.94212300 | -1.23441800 | 4.75156600  |
| H | 1.29674600 | -2.11367600 | 4.68968200  |
| H | 2.97536600 | -1.59192000 | 4.79673700  |
| H | 1.71768300 | -0.65121100 | 5.64377000  |

**TS5(SR)**

|   |             |             |             |
|---|-------------|-------------|-------------|
| N | -0.71421200 | -1.04255300 | 1.97756100  |
| N | 0.16046100  | -1.56212200 | 2.87951500  |
| N | 1.13207700  | -0.07483800 | 1.57014200  |
| C | -2.87923600 | -0.86715800 | 3.00471600  |
| H | -2.41937000 | -0.14073900 | 3.67052600  |
| C | -4.20956600 | -1.25668800 | 3.10222700  |
| H | -4.84434200 | -0.83359400 | 3.87300000  |
| C | -4.71658100 | -2.19175700 | 2.20237200  |
| H | -5.75735800 | -2.49773200 | 2.26152500  |
| C | -3.90894000 | -2.72999100 | 1.20423700  |
| H | -4.33873500 | -3.43550800 | 0.50138100  |
| C | -2.56444600 | -2.37278300 | 1.07700500  |
| C | -2.09886400 | -1.43359000 | 2.00252600  |
| C | -0.15316000 | -0.12479400 | 1.20224700  |
| C | 1.26913000  | -0.93765600 | 2.61944300  |
| C | 2.62563300  | -0.86912100 | 3.22227300  |
| H | 3.13545200  | -1.83344800 | 3.15395300  |
| H | 2.54464700  | -0.60652900 | 4.27859700  |
| C | 3.30227800  | 0.25820700  | 2.39198700  |
| H | 4.28068000  | -0.04917400 | 2.02215600  |
| H | 3.45946600  | 1.13691300  | 3.01960800  |
| C | 2.35530200  | 0.66768600  | 1.21623500  |
| C | 2.84561300  | 0.39716700  | -0.26464700 |
| C | 4.34097000  | 0.71767200  | -0.33652100 |
| C | 5.33152900  | -0.23779000 | -0.53521100 |
| C | 4.71277100  | 2.05937800  | -0.19836300 |
| C | 6.67362400  | 0.14169000  | -0.57437200 |

|   |             |             |             |
|---|-------------|-------------|-------------|
| H | 5.07985500  | -1.28198500 | -0.68877500 |
| C | 6.05151000  | 2.42226700  | -0.23788400 |
| H | 3.94673600  | 2.82095000  | -0.09300800 |
| C | 7.04826100  | 1.46714900  | -0.42289700 |
| C | 2.50576600  | -1.02646800 | -0.70232100 |
| C | 2.82001900  | -2.12511000 | 0.10025100  |
| C | 1.80284700  | -1.24972700 | -1.88252500 |
| C | 2.41917300  | -3.40582700 | -0.25671400 |
| H | 3.38849100  | -1.99450300 | 1.01694100  |
| C | 1.40571300  | -2.53844700 | -2.23308800 |
| H | 1.54986700  | -0.41486600 | -2.52584100 |
| C | 1.70704900  | -3.62900700 | -1.42986700 |
| H | 8.09176300  | 1.75691500  | -0.46895900 |
| H | 1.38712800  | -4.62734400 | -1.70461600 |
| H | 1.28958200  | 1.20790400  | -1.13640200 |
| C | 6.43024200  | 3.86513000  | -0.03898500 |
| C | 7.71225700  | -0.93058800 | -0.75848700 |
| C | 0.59969200  | -2.70579700 | -3.49239600 |
| C | 2.76242900  | -4.53183200 | 0.67678400  |
| F | 2.37540800  | -4.24126300 | 1.93328000  |
| F | 4.08451000  | -4.74458000 | 0.72412800  |
| F | 2.17439800  | -5.67772600 | 0.32286900  |
| F | -0.51497300 | -1.96590400 | -3.44135500 |
| F | 0.23537800  | -3.98096600 | -3.68463700 |
| F | 1.28811000  | -2.31020200 | -4.57034500 |
| F | 6.55762000  | 4.15835500  | 1.26367300  |
| F | 7.59932200  | 4.15103500  | -0.62589200 |
| F | 5.50316900  | 4.68926000  | -0.54046400 |
| F | 7.86830700  | -1.64935200 | 0.36379100  |
| F | 8.90617900  | -0.42029600 | -1.07829000 |
| F | 7.35808100  | -1.78888100 | -1.72421200 |
| C | -1.63670000 | -3.04584400 | 0.07680200  |
| C | -2.36361900 | -3.62432800 | -1.13748800 |
| C | -0.85545200 | -4.15241600 | 0.80608300  |
| H | -0.92361900 | -2.29606900 | -0.29892600 |
| H | -3.00828100 | -2.88381200 | -1.61695900 |
| H | -1.62602000 | -3.96714200 | -1.86876600 |
| H | -2.96576500 | -4.49446700 | -0.85357600 |
| H | -0.19065500 | -3.75570100 | 1.57834900  |
| H | -1.55868300 | -4.84027400 | 1.28667400  |
| H | -0.25596300 | -4.73184200 | 0.09875100  |
| C | -2.22312500 | 2.91751100  | -0.07709700 |
| C | -1.60246000 | 1.82641600  | 0.78399600  |
| H | -1.40000400 | 3.56120000  | -0.41919900 |

|   |             |             |             |
|---|-------------|-------------|-------------|
| C | -0.81424400 | 0.79222300  | 0.18887700  |
| H | -2.20881800 | 1.45354600  | 1.61618000  |
| C | -3.14161200 | 3.79756800  | 0.78116600  |
| C | -2.47463100 | 4.32848100  | 2.05336400  |
| H | -4.04154500 | 3.23433000  | 1.06580600  |
| H | -3.48294100 | 4.64160800  | 0.17041200  |
| C | -3.33463200 | 5.38298200  | 2.74441500  |
| H | -2.28568200 | 3.50112200  | 2.74884100  |
| H | -1.48890100 | 4.74303500  | 1.80822200  |
| H | -2.86445000 | 5.74297700  | 3.66333500  |
| H | -3.49970000 | 6.24457400  | 2.09008100  |
| H | -4.31619100 | 4.97563900  | 3.00819600  |
| O | -0.41986200 | 0.68597600  | -0.98037900 |
| H | -1.80389000 | -0.00629200 | -2.23575400 |
| C | -5.52982800 | -0.46862100 | -0.64625800 |
| C | -3.80247600 | 1.20333300  | -1.15099100 |
| C | -3.63605500 | -0.05247900 | -1.68283800 |
| N | -4.61028100 | -0.97113100 | -1.41634400 |
| O | -2.61901700 | -0.48039000 | -2.46002800 |
| S | -5.24415000 | 1.18265700  | -0.17727700 |
| C | -2.90437000 | 2.38410600  | -1.37593100 |
| H | -2.08634900 | 1.99144200  | -1.98846200 |
| C | -6.68637100 | -1.23942500 | -0.16843400 |
| C | -6.85860800 | -2.54785000 | -0.63588300 |
| C | -7.58518600 | -0.72137800 | 0.76868700  |
| C | -7.90621100 | -3.32612100 | -0.16078300 |
| H | -6.15565400 | -2.93361200 | -1.36730500 |
| C | -8.63424700 | -1.50327800 | 1.23929600  |
| H | -7.45940200 | 0.29085800  | 1.14411800  |
| C | -8.79570900 | -2.80859200 | 0.78028500  |
| H | -8.03204300 | -4.33966900 | -0.52770900 |
| H | -9.32564800 | -1.09350600 | 1.96832500  |
| H | -9.61340000 | -3.41848500 | 1.15022800  |
| C | -3.49415200 | 3.53208300  | -2.19316400 |
| C | -4.85397700 | 3.68970300  | -2.45715600 |
| C | -2.60553300 | 4.48501400  | -2.70792300 |
| C | -5.31482000 | 4.77822600  | -3.19691200 |
| H | -5.56707400 | 2.95571000  | -2.10113100 |
| C | -3.06161000 | 5.57107200  | -3.44396900 |
| H | -1.53804000 | 4.36633800  | -2.53707500 |
| C | -4.42474500 | 5.72516200  | -3.68852900 |
| H | -6.37814300 | 4.87885500  | -3.39081500 |
| H | -2.35164400 | 6.29335200  | -3.83452500 |
| H | -4.78501600 | 6.57099700  | -4.26507800 |

|   |             |            |             |
|---|-------------|------------|-------------|
| H | -0.67053300 | 2.30526700 | 1.42936000  |
| C | 0.15551400  | 2.32889800 | 3.45214900  |
| O | 0.43504500  | 2.79963700 | 2.29000700  |
| O | -0.49540200 | 1.28995000 | 3.65749700  |
| C | 0.64445600  | 3.15817100 | 4.63100200  |
| H | 0.01354300  | 4.04914800 | 4.70835700  |
| H | 0.57815500  | 2.59071100 | 5.55899600  |
| H | 1.66606100  | 3.50304000 | 4.45734900  |
| H | 2.11196600  | 1.73294100 | 1.27261000  |
| O | 2.25264500  | 1.34565400 | -1.11538700 |

**TS5(SS)**

|   |             |             |             |
|---|-------------|-------------|-------------|
| O | -1.23184100 | 1.52764700  | -0.46880400 |
| N | -0.37449700 | -3.15598800 | -1.07020600 |
| N | -1.57899300 | -3.67398500 | -1.43447200 |
| N | -1.58592200 | -1.46573300 | -1.48448800 |
| C | 1.42149100  | -4.58649500 | -1.79139500 |
| H | 1.12465200  | -4.33315400 | -2.80559800 |
| C | 2.46375600  | -5.45545200 | -1.49644600 |
| H | 3.01891900  | -5.92794000 | -2.29936600 |
| C | 2.79422600  | -5.70352900 | -0.16497100 |
| H | 3.60792100  | -6.38215600 | 0.07249000  |
| C | 2.10056900  | -5.08426100 | 0.87084300  |
| H | 2.38285700  | -5.29151600 | 1.89766800  |
| C | 1.03603600  | -4.21298900 | 0.61574500  |
| C | 0.73298700  | -4.00416700 | -0.73300000 |
| C | -0.35216600 | -1.83447700 | -1.12944100 |
| C | -2.29047800 | -2.61809000 | -1.69417400 |
| C | -3.66459100 | -2.34108700 | -2.19268200 |
| H | -4.41493600 | -2.75622200 | -1.51489300 |
| H | -3.80746000 | -2.80386100 | -3.17088100 |
| C | -3.69037800 | -0.78679700 | -2.27265000 |
| H | -4.54166200 | -0.37480800 | -1.72955800 |
| H | -3.79491300 | -0.46701600 | -3.31016700 |
| C | -2.34123900 | -0.22254600 | -1.71708400 |
| H | -1.80577400 | 0.34042300  | -2.48622200 |
| C | -2.38483400 | 0.72086900  | -0.45251600 |
| C | -3.54166500 | 1.70292100  | -0.65301100 |
| C | -4.73898800 | 1.63258100  | 0.04857000  |
| C | -3.37661000 | 2.70188500  | -1.62038400 |
| C | -5.76450700 | 2.54005200  | -0.22279200 |
| H | -4.89333800 | 0.87954400  | 0.81527500  |
| C | -4.40463900 | 3.59581900  | -1.87910100 |
| H | -2.43609000 | 2.78420800  | -2.15514900 |



|   |             |             |             |
|---|-------------|-------------|-------------|
| C | -5.61186200 | 3.52315000  | -1.18615900 |
| C | -2.48131400 | -0.06984000 | 0.85201900  |
| C | -3.32747900 | -1.17192000 | 0.97512300  |
| C | -1.66970400 | 0.26306800  | 1.93504900  |
| C | -3.33846900 | -1.93936400 | 2.13391900  |
| H | -3.99363000 | -1.45267900 | 0.16584400  |
| C | -1.68353200 | -0.51350500 | 3.09049100  |
| H | -1.00031200 | 1.11494100  | 1.87459600  |
| C | -2.51443400 | -1.62040100 | 3.20668500  |
| H | -6.41607200 | 4.21843000  | -1.39981700 |
| H | -2.51218100 | -2.22515100 | 4.10640600  |
| H | -0.46238900 | 1.01459500  | -0.17263000 |
| C | -4.21310000 | 4.69678800  | -2.88732200 |
| C | -7.03442100 | 2.43688700  | 0.57603000  |
| C | -0.74701600 | -0.12912500 | 4.20480900  |
| C | -4.26503900 | -3.12092500 | 2.17788400  |
| F | -4.02515300 | -3.91253100 | 3.22774000  |
| F | -4.13848400 | -3.86560200 | 1.06315400  |
| F | -5.54714200 | -2.73853100 | 2.23951500  |
| F | -1.07455300 | 1.05621300  | 4.72931100  |
| F | 0.50996700  | -0.03555300 | 3.75782200  |
| F | -0.76281100 | -1.03293200 | 5.19738900  |
| F | -3.89713100 | 5.85290300  | -2.29075800 |
| F | -3.23619400 | 4.41004800  | -3.75459400 |
| F | -5.33655500 | 4.90943200  | -3.58815700 |
| F | -7.48296300 | 1.17198700  | 0.60387100  |
| F | -8.00698100 | 3.20370800  | 0.07088500  |
| F | -6.84245900 | 2.80887800  | 1.84799700  |
| C | 0.19013200  | -3.62458600 | 1.73333600  |
| C | 1.00406800  | -3.26131800 | 2.97508700  |
| C | -0.93089500 | -4.61788400 | 2.07239400  |
| H | -0.27193400 | -2.69447400 | 1.37618000  |
| H | 1.81592300  | -2.56923800 | 2.73458000  |
| H | 0.35590100  | -2.77874200 | 3.71127100  |
| H | 1.42959400  | -4.14811600 | 3.45452000  |
| H | -1.58712700 | -4.78837800 | 1.21355200  |
| H | -0.50318800 | -5.58058900 | 2.37112700  |
| H | -1.53788400 | -4.24794600 | 2.90308100  |
| C | 2.84394800  | 0.31584400  | -1.46044800 |
| C | 1.75939300  | -0.68009600 | -1.83745000 |
| H | 2.34627700  | 1.13642200  | -0.92506900 |
| C | 0.81279300  | -0.92791600 | -0.80064900 |
| H | 2.06033400  | -1.58446800 | -2.38068200 |
| C | 3.53284000  | 0.94098800  | -2.67427500 |

|   |              |              |              |
|---|--------------|--------------|--------------|
| C | 2. 62669800  | 1. 87539800  | -3. 47647500 |
| H | 3. 92369800  | 0. 15211600  | -3. 32997500 |
| H | 4. 39930500  | 1. 51671400  | -2. 31944500 |
| C | 3. 37221200  | 2. 52589800  | -4. 63909200 |
| H | 1. 75877100  | 1. 32632500  | -3. 85656400 |
| H | 2. 23759100  | 2. 65307100  | -2. 80681200 |
| H | 2. 72234100  | 3. 19915800  | -5. 20379700 |
| H | 4. 22932700  | 3. 10625600  | -4. 28248700 |
| H | 3. 75075500  | 1. 76778800  | -5. 33227700 |
| O | 0. 71426700  | -0. 34901000 | 0. 29425000  |
| H | 2. 04315100  | 0. 70707000  | 1. 15808800  |
| C | 5. 75643900  | 2. 41778900  | 1. 68803100  |
| C | 4. 47057200  | 0. 75440900  | 0. 42905900  |
| C | 3. 78726400  | 1. 51012300  | 1. 35116000  |
| N | 4. 50550700  | 2. 43584700  | 2. 04673600  |
| O | 2. 47392200  | 1. 42960700  | 1. 64439600  |
| S | 6. 13717300  | 1. 23616400  | 0. 46495800  |
| C | 3. 83471600  | -0. 31629400 | -0. 42269900 |
| H | 3. 20614800  | -0. 89583400 | 0. 27008300  |
| C | 6. 77773800  | 3. 30278500  | 2. 27022800  |
| C | 6. 41991400  | 4. 12402400  | 3. 34568000  |
| C | 8. 08582300  | 3. 34685000  | 1. 77941100  |
| C | 7. 35981800  | 4. 97087100  | 3. 91833200  |
| H | 5. 40073700  | 4. 07903100  | 3. 71372900  |
| C | 9. 02336800  | 4. 19494200  | 2. 35711100  |
| H | 8. 37359900  | 2. 72260400  | 0. 93750400  |
| C | 8. 66361000  | 5. 00963700  | 3. 42756500  |
| H | 7. 07456200  | 5. 60290600  | 4. 75321200  |
| H | 10. 03574400 | 4. 22264000  | 1. 96736300  |
| H | 9. 39597000  | 5. 67318200  | 3. 87603100  |
| C | 4. 78524900  | -1. 32552100 | -1. 04155300 |
| C | 5. 88899000  | -0. 95048300 | -1. 81874200 |
| C | 4. 54298400  | -2. 68955000 | -0. 85849100 |
| C | 6. 73272100  | -1. 90761900 | -2. 37270000 |
| H | 6. 09467500  | 0. 09866200  | -2. 00289100 |
| C | 5. 38823900  | -3. 64927800 | -1. 41026800 |
| H | 3. 68415600  | -3. 00473000 | -0. 26747200 |
| C | 6. 48901200  | -3. 26228500 | -2. 16632200 |
| H | 7. 58401200  | -1. 59160500 | -2. 96715300 |
| H | 5. 18682900  | -4. 70174800 | -1. 23977100 |
| H | 7. 15246200  | -4. 00855400 | -2. 59138200 |
| H | 0. 91837100  | -0. 31381600 | -2. 72129600 |
| C | -0. 19165000 | -1. 34727600 | -4. 31356000 |
| O | -0. 03199700 | -0. 19085500 | -3. 76740900 |

|   |             |             |             |
|---|-------------|-------------|-------------|
| O | 0.06551100  | -2.42887600 | -3.76426500 |
| C | -0.73801700 | -1.32192900 | -5.73210600 |
| H | -1.61959600 | -0.67794500 | -5.78115000 |
| H | 0.01377000  | -0.88378500 | -6.39364200 |
| H | -0.97988200 | -2.32935000 | -6.06911900 |

**M5(RR)**

|   |             |             |             |
|---|-------------|-------------|-------------|
| O | -0.94878100 | 0.37207700  | 0.50237900  |
| N | 2.30117000  | -1.55858300 | -2.35947200 |
| N | 1.60235200  | -2.55671400 | -2.98978300 |
| N | 0.26090300  | -1.08601900 | -2.03666400 |
| C | 4.44668800  | -1.31257000 | -3.44428400 |
| H | 3.90479000  | -0.99308300 | -4.32826700 |
| C | 5.83181700  | -1.37582500 | -3.42349900 |
| H | 6.40284200  | -1.10442600 | -4.30422100 |
| C | 6.47649000  | -1.78753300 | -2.25788700 |
| H | 7.56012700  | -1.83520000 | -2.22573000 |
| C | 5.74032200  | -2.13980000 | -1.13329200 |
| H | 6.26095900  | -2.45923700 | -0.23505600 |
| C | 4.34054900  | -2.08638200 | -1.11824300 |
| C | 3.73348800  | -1.65439700 | -2.29918100 |
| C | 1.50695100  | -0.64195000 | -1.80078500 |
| C | 0.36363200  | -2.22531100 | -2.78184000 |
| C | -0.96831000 | -2.72377600 | -3.22414000 |
| H | -1.13246700 | -3.75131300 | -2.89274400 |
| H | -1.02388200 | -2.72221700 | -4.31460500 |
| C | -1.93779900 | -1.68215200 | -2.59108100 |
| H | -2.74951900 | -2.16489500 | -2.04623800 |
| H | -2.40262500 | -1.08664900 | -3.37819000 |
| C | -1.12239100 | -0.72481200 | -1.66089800 |
| H | -1.28007500 | 0.32697100  | -1.91179000 |
| C | -1.38655900 | -0.79539900 | -0.09452500 |
| C | -2.91184300 | -0.79006300 | 0.08166800  |
| C | -3.66224200 | -1.90077700 | 0.45900800  |
| C | -3.56620700 | 0.42373500  | -0.15312300 |
| C | -5.04682200 | -1.80389400 | 0.58327500  |
| H | -3.18246200 | -2.84737000 | 0.68600700  |
| C | -4.94879300 | 0.50202700  | -0.02733500 |
| H | -2.97854700 | 1.30515100  | -0.40724900 |
| C | -5.70422000 | -0.60696800 | 0.33885900  |
| C | -0.71959300 | -2.02020700 | 0.54632200  |
| C | -0.78515200 | -3.29180100 | -0.01393400 |
| C | -0.00592500 | -1.86256900 | 1.73955500  |
| C | -0.12499000 | -4.37285000 | 0.56656500  |

|   |             |             |             |
|---|-------------|-------------|-------------|
| H | -1.37024800 | -3.47406700 | -0.90739300 |
| C | 0.60735800  | -2.95630200 | 2.33824800  |
| H | 0.06670200  | -0.87853200 | 2.18649700  |
| C | 0.57013400  | -4.22125100 | 1.75402300  |
| H | -6.77983100 | -0.53210300 | 0.44619400  |
| H | 1.07618500  | -5.06333100 | 2.21328700  |
| H | 0.08524500  | 0.42270700  | 0.44228300  |
| C | -5.62567700 | 1.81438600  | -0.31261100 |
| C | -5.83032400 | -3.03631600 | 0.93678900  |
| C | 1.28087500  | -2.80714100 | 3.67420600  |
| C | -0.19461900 | -5.69185800 | -0.14497000 |
| F | 0.16464100  | -5.55254100 | -1.43623500 |
| F | -1.44068000 | -6.18671900 | -0.14942000 |
| F | 0.60807300  | -6.60852800 | 0.40291200  |
| F | 1.63828000  | -1.54379400 | 3.92316400  |
| F | 2.39188000  | -3.56550200 | 3.74556000  |
| F | 0.48038000  | -3.20382800 | 4.67285100  |
| F | -5.07514100 | 2.81506500  | 0.37978900  |
| F | -5.52988300 | 2.12753300  | -1.61679900 |
| F | -6.93198500 | 1.77822800  | -0.01052400 |
| F | -6.03137100 | -3.81055600 | -0.14243300 |
| F | -7.03441300 | -2.73641500 | 1.43857100  |
| F | -5.18525400 | -3.78929000 | 1.83865700  |
| C | 3.57560800  | -2.46834700 | 0.13830300  |
| C | 3.95442800  | -1.54842400 | 1.30493700  |
| C | 3.81881500  | -3.94250500 | 0.48488300  |
| H | 2.50006900  | -2.33663600 | -0.03694400 |
| H | 3.64030400  | -0.52109100 | 1.10414900  |
| H | 3.44777900  | -1.87637500 | 2.21513000  |
| H | 5.03274200  | -1.57173900 | 1.49604700  |
| H | 3.43152300  | -4.60541600 | -0.29488800 |
| H | 4.88674100  | -4.14805900 | 0.60956100  |
| H | 3.32413800  | -4.18262100 | 1.42936300  |
| C | 3.51074400  | 2.31133500  | -0.15276700 |
| C | 3.17098500  | 1.27538300  | -1.22839000 |
| H | 3.30256800  | 1.83261400  | 0.81015400  |
| C | 1.79355700  | 0.64663500  | -0.98574600 |
| H | 3.21280400  | 1.70458000  | -2.23757100 |
| C | 5.01143400  | 2.64385500  | -0.23002300 |
| C | 5.92653300  | 1.53443600  | 0.28947500  |
| H | 5.21806100  | 3.55106300  | 0.34961800  |
| H | 5.27325700  | 2.87843200  | -1.27291500 |
| C | 7.40337900  | 1.89172900  | 0.14403400  |
| H | 5.68976300  | 1.34654700  | 1.34432900  |

|   |             |            |             |
|---|-------------|------------|-------------|
| H | 5.73603400  | 0.59225000 | -0.23968600 |
| H | 8.04838300  | 1.09777900 | 0.53019300  |
| H | 7.66189600  | 2.05261500 | -0.90769000 |
| H | 7.64053300  | 2.81129200 | 0.68804600  |
| O | 1.51706300  | 0.40896000 | 0.27498500  |
| H | 3.93525400  | 0.49891500 | -1.17046700 |
| C | -1.19334200 | 4.06908900 | -0.67456800 |
| C | 1.19058200  | 3.51724600 | -0.40348000 |
| C | 0.41319200  | 2.63014500 | -1.09648800 |
| N | -0.91350800 | 2.93361600 | -1.24665900 |
| O | 0.80772900  | 1.48961200 | -1.70153500 |
| S | 0.16104700  | 4.82866800 | 0.10221300  |
| C | 2.69034300  | 3.63013500 | -0.19799300 |
| H | 3.07924300  | 4.21595700 | -1.04691000 |
| C | -2.52582200 | 4.69268600 | -0.70362100 |
| C | -3.39950100 | 4.37264500 | -1.74720800 |
| C | -2.92690800 | 5.60796600 | 0.27444200  |
| C | -4.65123900 | 4.97142200 | -1.81671700 |
| H | -3.07766400 | 3.65525200 | -2.49512400 |
| C | -4.18227100 | 6.19959800 | 0.20341400  |
| H | -2.26118200 | 5.84238500 | 1.10069300  |
| C | -5.04574000 | 5.88555700 | -0.84373000 |
| H | -5.32473400 | 4.71366700 | -2.62736600 |
| H | -4.48996500 | 6.90251500 | 0.97079000  |
| H | -6.02551000 | 6.34913000 | -0.89818900 |
| C | 2.96347600  | 4.42707400 | 1.07129200  |
| C | 2.55135400  | 3.91282400 | 2.30551100  |
| C | 3.60582600  | 5.66323600 | 1.03495800  |
| C | 2.78669100  | 4.62000200 | 3.47791500  |
| H | 2.02636300  | 2.95978600 | 2.32987300  |
| C | 3.84219200  | 6.37504200 | 2.21041400  |
| H | 3.92418500  | 6.07085800 | 0.07846300  |
| C | 3.43516500  | 5.85394000 | 3.43340100  |
| H | 2.45895700  | 4.21195700 | 4.42884800  |
| H | 4.34351100  | 7.33687100 | 2.16655700  |
| H | 3.61785300  | 6.40651600 | 4.34948300  |

**M5(RS)**

|   |             |             |             |
|---|-------------|-------------|-------------|
| O | 1.28560400  | -0.12434900 | -1.82001800 |
| N | -1.65134300 | -1.43817600 | 1.63964100  |
| N | -0.80521400 | -1.46440600 | 2.72214900  |
| N | 0.04733000  | -0.32330000 | 1.03862900  |
| C | -3.85503500 | -1.45460000 | 2.60753200  |
| H | -3.56197200 | -0.55399200 | 3.13835300  |

|   |             |             |             |
|---|-------------|-------------|-------------|
| C | -5.12366100 | -2.00108000 | 2.75034900  |
| H | -5.84997600 | -1.53189500 | 3.40442500  |
| C | -5.44811900 | -3.15108900 | 2.03825900  |
| H | -6.43888800 | -3.58384400 | 2.13075100  |
| C | -4.50920700 | -3.75831600 | 1.21004400  |
| H | -4.78666900 | -4.65739100 | 0.67190200  |
| C | -3.21875000 | -3.24294300 | 1.05193300  |
| C | -2.93979200 | -2.06951900 | 1.76062000  |
| C | -1.16225600 | -0.72412000 | 0.61866100  |
| C | 0.21634800  | -0.77202700 | 2.31815400  |
| C | 1.47605300  | -0.25282400 | 2.92261800  |
| H | 2.20355800  | -1.05741500 | 3.05012100  |
| H | 1.28501800  | 0.18359600  | 3.90418400  |
| C | 1.89867800  | 0.81270600  | 1.87398100  |
| H | 2.97897300  | 0.86665700  | 1.73708400  |
| H | 1.56827700  | 1.79840900  | 2.21228100  |
| C | 1.15647700  | 0.50866000  | 0.53811000  |
| H | 0.71202000  | 1.41301800  | 0.12705400  |
| C | 1.98231300  | -0.16429800 | -0.62463400 |
| C | 3.18478700  | 0.76811000  | -0.84842000 |
| C | 4.51594300  | 0.36889600  | -0.86062100 |
| C | 2.89250300  | 2.11579200  | -1.09665900 |
| C | 5.53256700  | 1.30625300  | -1.06071300 |
| H | 4.78599100  | -0.67404700 | -0.73079400 |
| C | 3.91103600  | 3.04232100  | -1.25867800 |
| H | 1.85821200  | 2.43822200  | -1.18298600 |
| C | 5.24748100  | 2.64997100  | -1.23883100 |
| C | 2.35994000  | -1.59914300 | -0.23385600 |
| C | 3.22976000  | -1.89459900 | 0.81649300  |
| C | 1.77163700  | -2.66389600 | -0.92176800 |
| C | 3.47850100  | -3.21256200 | 1.19185500  |
| H | 3.74531000  | -1.10118400 | 1.34971600  |
| C | 2.05204700  | -3.97639700 | -0.55614800 |
| H | 1.08896000  | -2.46473100 | -1.73984800 |
| C | 2.89483400  | -4.27062700 | 0.51046300  |
| H | 6.04295300  | 3.37248400  | -1.37725000 |
| H | 3.09556900  | -5.29631600 | 0.79791700  |
| H | 0.37077500  | -0.57278300 | -1.76210600 |
| C | 3.55174500  | 4.49637800  | -1.37640700 |
| C | 6.95528700  | 0.82217200  | -1.03587000 |
| C | 1.48324400  | -5.09504600 | -1.38321000 |
| C | 4.36675000  | -3.44754200 | 2.37871500  |
| F | 3.75779700  | -3.06060900 | 3.51791000  |
| F | 5.49846300  | -2.73514300 | 2.29278100  |

|   |              |              |              |
|---|--------------|--------------|--------------|
| F | 4. 69754800  | -4. 73389300 | 2. 52116400  |
| F | 0. 27249200  | -4. 78213400 | -1. 86711900 |
| F | 1. 35337600  | -6. 22552500 | -0. 66791600 |
| F | 2. 26578800  | -5. 38209000 | -2. 43056500 |
| F | 3. 31233900  | 5. 02652600  | -0. 15760000 |
| F | 4. 53289700  | 5. 21778300  | -1. 92928800 |
| F | 2. 44092000  | 4. 68203100  | -2. 09662300 |
| F | 7. 13447900  | -0. 21205600 | -1. 86856900 |
| F | 7. 29878100  | 0. 39625300  | 0. 19024400  |
| F | 7. 81888400  | 1. 78358200  | -1. 38432400 |
| C | -2. 16126900 | -3. 94406100 | 0. 21449700  |
| C | -2. 75947500 | -4. 91597100 | -0. 80253700 |
| C | -1. 19135800 | -4. 67504900 | 1. 15679700  |
| H | -1. 59932900 | -3. 19070300 | -0. 35429000 |
| H | -3. 50945400 | -4. 42664500 | -1. 43263800 |
| H | -1. 96706900 | -5. 29468600 | -1. 44902800 |
| H | -3. 22706400 | -5. 77689800 | -0. 31267200 |
| H | -0. 68752600 | -3. 98196500 | 1. 83787800  |
| H | -1. 73575500 | -5. 40635600 | 1. 76380800  |
| H | -0. 43261700 | -5. 21110200 | 0. 58257500  |
| C | -3. 77246900 | 0. 27226500  | -2. 06964400 |
| C | -3. 21396200 | -0. 60719800 | -0. 94249000 |
| H | -2. 94760100 | 0. 52670000  | -2. 74675000 |
| C | -1. 68474600 | -0. 49912800 | -0. 83157600 |
| H | -3. 71165500 | -0. 35381900 | -0. 00228400 |
| C | -4. 82011400 | -0. 48888000 | -2. 88630100 |
| C | -4. 17300700 | -1. 53806800 | -3. 79372500 |
| H | -5. 39891100 | 0. 20903300  | -3. 50639200 |
| H | -5. 54017700 | -0. 96582900 | -2. 20705700 |
| C | -5. 19282100 | -2. 50399200 | -4. 38891700 |
| H | -3. 63338000 | -1. 02198800 | -4. 59668000 |
| H | -3. 40560100 | -2. 09131600 | -3. 23739300 |
| H | -4. 71912700 | -3. 22523500 | -5. 05964100 |
| H | -5. 70471500 | -3. 06400900 | -3. 59930600 |
| H | -5. 95757000 | -1. 96707200 | -4. 95972100 |
| O | -0. 99667000 | -1. 28278600 | -1. 61721400 |
| H | -3. 42748200 | -1. 66280000 | -1. 13014500 |
| C | -1. 75576800 | 3. 91228600  | 0. 45096000  |
| C | -3. 20617200 | 2. 32605700  | -0. 74681500 |
| C | -1. 89276400 | 1. 96827400  | -0. 58643700 |
| N | -1. 09040300 | 2. 85404600  | 0. 09045000  |
| O | -1. 26373400 | 0. 89564400  | -1. 10942900 |
| S | -3. 44002400 | 3. 87534200  | 0. 00555700  |
| C | -4. 30623800 | 1. 62006000  | -1. 49803200 |

|   |             |            |             |
|---|-------------|------------|-------------|
| H | -4.57523600 | 2.24159500 | -2.36357500 |
| C | -1.14105400 | 5.06102700 | 1.13289800  |
| C | 0.23631800  | 5.26747300 | 0.99297300  |
| C | -1.89821600 | 5.95315400 | 1.89664100  |
| C | 0.84411500  | 6.35344500 | 1.60923700  |
| H | 0.81511800  | 4.58350600 | 0.38177400  |
| C | -1.28505900 | 7.03834000 | 2.51295900  |
| H | -2.96561700 | 5.79004000 | 2.02068000  |
| C | 0.08563400  | 7.24070800 | 2.37109900  |
| H | 1.90952000  | 6.51094700 | 1.47817900  |
| H | -1.87874600 | 7.72423800 | 3.10826900  |
| H | 0.56120700  | 8.09040000 | 2.85006600  |
| C | -5.57134400 | 1.46001200 | -0.66317300 |
| C | -5.52713600 | 1.24120900 | 0.71719100  |
| C | -6.82354500 | 1.51364200 | -1.28250500 |
| C | -6.69542600 | 1.05885800 | 1.45141100  |
| H | -4.56669700 | 1.23415700 | 1.22660000  |
| C | -7.99389700 | 1.33183000 | -0.55269900 |
| H | -6.88037700 | 1.70746900 | -2.35048800 |
| C | -7.93363700 | 1.09934500 | 0.81890600  |
| H | -6.63518500 | 0.89656600 | 2.52345700  |
| H | -8.95471300 | 1.38175000 | -1.05518800 |
| H | -8.84627000 | 0.96441800 | 1.39044200  |

### M5(SR)

|   |             |             |             |
|---|-------------|-------------|-------------|
| O | -1.43757500 | 0.05834700  | 0.82956700  |
| N | 0.77435800  | -1.98847200 | -1.58453700 |
| N | -0.20973600 | -2.67590300 | -2.25464800 |
| N | -0.86329900 | -0.65564200 | -1.68096200 |
| C | 3.10133500  | -2.32018400 | -2.17411700 |
| H | 2.94115000  | -1.63662100 | -3.00169400 |
| C | 4.34321200  | -2.90126200 | -1.95113900 |
| H | 5.18134400  | -2.65731200 | -2.59429000 |
| C | 4.48917000  | -3.80342400 | -0.90319200 |
| H | 5.45466700  | -4.25991300 | -0.70896800 |
| C | 3.40192300  | -4.12963700 | -0.09922000 |
| H | 3.53811000  | -4.85025500 | 0.70010000  |
| C | 2.14369000  | -3.55080700 | -0.28282000 |
| C | 2.04188700  | -2.62899700 | -1.32914800 |
| C | 0.39299700  | -0.75524100 | -1.23411800 |
| C | -1.19578000 | -1.82849000 | -2.29407500 |
| C | -2.58007100 | -1.75346700 | -2.85668200 |
| H | -3.26347200 | -2.39257100 | -2.29084900 |
| H | -2.60597000 | -2.06764400 | -3.90105600 |



|   |             |             |             |
|---|-------------|-------------|-------------|
| C | -2.88992300 | -0.23692600 | -2.68522900 |
| H | -3.94615400 | -0.04438000 | -2.50590200 |
| H | -2.61108100 | 0.28763300  | -3.60272400 |
| C | -1.97621300 | 0.28416000  | -1.54347900 |
| H | -1.60326700 | 1.28589500  | -1.74181200 |
| C | -2.50891800 | 0.21653300  | -0.03479500 |
| C | -3.21278700 | 1.54765000  | 0.29805200  |
| C | -4.44155500 | 1.64052700  | 0.94775600  |
| C | -2.48673000 | 2.72939900  | 0.09594800  |
| C | -4.96119900 | 2.88188600  | 1.31354700  |
| H | -5.00642300 | 0.75329300  | 1.21125800  |
| C | -3.01074600 | 3.95823100  | 0.47346300  |
| H | -1.47246900 | 2.68931900  | -0.29744000 |
| C | -4.26257700 | 4.05421100  | 1.07235000  |
| C | -3.38508800 | -1.03047800 | 0.08612300  |
| C | -4.70034200 | -1.09428900 | -0.38001500 |
| C | -2.79467500 | -2.20201800 | 0.56791500  |
| C | -5.39448500 | -2.29984100 | -0.38900000 |
| H | -5.20329100 | -0.20566700 | -0.74989500 |
| C | -3.49799800 | -3.40330100 | 0.54680900  |
| H | -1.78175000 | -2.15287500 | 0.95786500  |
| C | -4.80070900 | -3.47016400 | 0.06561700  |
| H | -4.66777800 | 5.01424900  | 1.36888800  |
| H | -5.34410100 | -4.40775600 | 0.05708700  |
| H | -0.66010000 | 0.69927500  | 0.52190000  |
| C | -2.19488900 | 5.19239800  | 0.20447900  |
| C | -6.31777600 | 2.91753700  | 1.95931800  |
| C | -2.80707900 | -4.66204100 | 0.99152500  |
| C | -6.77794900 | -2.31457500 | -0.97515400 |
| F | -6.72747200 | -2.16324500 | -2.31026900 |
| F | -7.52210000 | -1.30845800 | -0.49974900 |
| F | -7.42043300 | -3.45975900 | -0.72374300 |
| F | -2.03428400 | -4.44991000 | 2.06618200  |
| F | -2.00681200 | -5.14224800 | 0.02397700  |
| F | -3.67896400 | -5.62940600 | 1.29913700  |
| F | -0.92477100 | 5.03825700  | 0.60429100  |
| F | -2.15595100 | 5.47425400  | -1.10751100 |
| F | -2.69245500 | 6.26702500  | 0.82961200  |
| F | -6.39966900 | 2.04523900  | 2.97398800  |
| F | -7.27904400 | 2.58318800  | 1.08396200  |
| F | -6.61576000 | 4.13131900  | 2.43723100  |
| C | 0.96713300  | -3.88696900 | 0.61853700  |
| C | 0.84841100  | -2.86868100 | 1.76382200  |
| C | 1.05032400  | -5.30894800 | 1.17860600  |

|   |            |             |             |
|---|------------|-------------|-------------|
| H | 0.05649900 | -3.83655200 | 0.00976600  |
| H | 0.57748500 | -1.87083900 | 1.41069000  |
| H | 0.09067300 | -3.20564700 | 2.47748500  |
| H | 1.80676100 | -2.77280000 | 2.28511800  |
| H | 1.22802300 | -6.04562700 | 0.39009800  |
| H | 1.84811500 | -5.39772500 | 1.92316500  |
| H | 0.11138100 | -5.55592900 | 1.67712500  |
| C | 2.70931400 | 2.36893500  | -1.42899900 |
| C | 2.13581100 | 0.97629500  | -1.74005900 |
| H | 1.90113500 | 3.10149800  | -1.54782700 |
| C | 1.18013900 | 0.45389300  | -0.64658600 |
| H | 2.95362300 | 0.26625500  | -1.89872400 |
| C | 3.83870600 | 2.70267000  | -2.40779100 |
| C | 3.46204400 | 2.56968700  | -3.88418400 |
| H | 4.70204000 | 2.05213600  | -2.19555900 |
| H | 4.17249400 | 3.73051500  | -2.22670000 |
| C | 4.56372000 | 3.09048000  | -4.80360100 |
| H | 3.25446900 | 1.52113100  | -4.12942100 |
| H | 2.53141200 | 3.12212000  | -4.07132500 |
| H | 4.29676800 | 2.97736400  | -5.85752400 |
| H | 4.75756000 | 4.15085500  | -4.61636600 |
| H | 5.49956200 | 2.54852000  | -4.63377100 |
| O | 0.32926600 | 1.37428400  | -0.23821300 |
| H | 1.56035300 | 1.03017600  | -2.67148000 |
| C | 5.23031400 | -0.74105000 | 1.10969100  |
| C | 3.87877200 | 1.20344000  | 0.46921000  |
| C | 3.23219900 | 0.00472500  | 0.61722900  |
| N | 3.97848300 | -1.07475100 | 0.98293200  |
| O | 1.90288200 | -0.19204000 | 0.45066600  |
| S | 5.55900600 | 0.94423100  | 0.79370800  |
| C | 3.14318000 | 2.45433600  | 0.06636400  |
| H | 2.19865600 | 2.39433400  | 0.61989300  |
| C | 6.28549100 | -1.68975300 | 1.49407600  |
| C | 5.91792600 | -2.90937200 | 2.07548000  |
| C | 7.63847500 | -1.41286900 | 1.28001600  |
| C | 6.89132700 | -3.83442700 | 2.43011200  |
| H | 4.86341600 | -3.10608600 | 2.23989900  |
| C | 8.60992100 | -2.33928900 | 1.64228200  |
| H | 7.93307200 | -0.47556500 | 0.81521200  |
| C | 8.24004900 | -3.55303500 | 2.21541900  |
| H | 6.59870200 | -4.77592000 | 2.88457600  |
| H | 9.65755200 | -2.11511500 | 1.46992000  |
| H | 8.99913400 | -4.27602000 | 2.49619000  |
| C | 3.76887900 | 3.78593200  | 0.42521500  |

|   |             |             |              |
|---|-------------|-------------|--------------|
| C | 5. 11343000 | 4. 09931200 | 0. 20098600  |
| C | 2. 94037000 | 4. 77576000 | 0. 96221500  |
| C | 5. 61813500 | 5. 35458300 | 0. 52887300  |
| H | 5. 77692000 | 3. 36744000 | -0. 25125400 |
| C | 3. 43936400 | 6. 03391000 | 1. 28396800  |
| H | 1. 88854600 | 4. 55372100 | 1. 12477200  |
| C | 4. 78402500 | 6. 32576400 | 1. 07485300  |
| H | 6. 66635800 | 5. 57383800 | 0. 35145600  |
| H | 2. 77612600 | 6. 78397100 | 1. 70300500  |
| H | 5. 17874900 | 7. 30362700 | 1. 33145200  |

**M5(SS)**

|   |              |              |              |
|---|--------------|--------------|--------------|
| O | -0. 81106900 | 1. 04209500  | -0. 08269200 |
| N | 1. 04527400  | -2. 67396600 | -2. 02964100 |
| N | -0. 04933800 | -3. 28894200 | -2. 57980500 |
| N | -0. 43934800 | -1. 16558400 | -2. 12915900 |
| C | 2. 93158000  | -3. 64045500 | -3. 15473400 |
| H | 2. 49422300  | -3. 25353700 | -4. 06966500 |
| C | 4. 12510500  | -4. 34389000 | -3. 16784400 |
| H | 4. 64432800  | -4. 51884100 | -4. 10343800 |
| C | 4. 64222600  | -4. 82133500 | -1. 96432800 |
| H | 5. 57430100  | -5. 37688500 | -1. 95641800 |
| C | 3. 96756500  | -4. 59475400 | -0. 77266600 |
| H | 4. 38151800  | -4. 98258800 | 0. 15280300  |
| C | 2. 76176700  | -3. 88096600 | -0. 72010200 |
| C | 2. 27868600  | -3. 41424700 | -1. 94374600 |
| C | 0. 83371300  | -1. 37990900 | -1. 76796800 |
| C | -0. 93514200 | -2. 33906800 | -2. 62393400 |
| C | -2. 31701800 | -2. 17694400 | -3. 16017100 |
| H | -3. 03853600 | -2. 71676200 | -2. 54357600 |
| H | -2. 38615100 | -2. 57069800 | -4. 17558400 |
| C | -2. 48850300 | -0. 63221900 | -3. 11461100 |
| H | -3. 48980000 | -0. 32468900 | -2. 81164700 |
| H | -2. 32250900 | -0. 22503300 | -4. 11418400 |
| C | -1. 40176200 | -0. 04573100 | -2. 16639600 |
| H | -0. 88739100 | 0. 80400300  | -2. 61500900 |
| C | -1. 85132800 | 0. 40352100  | -0. 72517900 |
| C | -2. 97208100 | 1. 44683200  | -0. 91781300 |
| C | -2. 60015300 | 2. 63440700  | -1. 56603400 |
| C | -4. 27276700 | 1. 33641300  | -0. 44311400 |
| C | -3. 52195300 | 3. 64478300  | -1. 77718300 |
| H | -1. 56810200 | 2. 77850700  | -1. 86994100 |
| C | -5. 19319400 | 2. 36869900  | -0. 65137800 |
| H | -4. 59263500 | 0. 46979900  | 0. 12444200  |

|   |             |             |             |
|---|-------------|-------------|-------------|
| C | -4.83733500 | 3.52086700  | -1.32730400 |
| C | -2.27717000 | -0.82868100 | 0.08662800  |
| C | -1.48358400 | -1.21300200 | 1.17317400  |
| C | -3.38492000 | -1.61235400 | -0.23671600 |
| C | -1.80979800 | -2.35705200 | 1.89751200  |
| H | -0.62123600 | -0.60524100 | 1.44534500  |
| C | -3.68116400 | -2.76781400 | 0.48225000  |
| H | -4.04800200 | -1.33435100 | -1.05060300 |
| C | -2.89851100 | -3.15484100 | 1.55886500  |
| H | -5.55852100 | 4.31525300  | -1.48660500 |
| H | -3.13147600 | -4.05200100 | 2.12064500  |
| H | 0.07379000  | 1.03708800  | -0.64556400 |
| C | -6.59898600 | 2.17772400  | -0.15555700 |
| C | -3.12438400 | 4.92042500  | -2.46580800 |
| C | -4.86309400 | -3.57917600 | 0.04137900  |
| C | -1.00325400 | -2.70190300 | 3.11679100  |
| F | -1.44883800 | -2.04877600 | 4.20302700  |
| F | 0.28647200  | -2.37637600 | 2.96720900  |
| F | -1.06215900 | -4.01422700 | 3.40119200  |
| F | -5.98780800 | -2.85064700 | 0.04460000  |
| F | -5.06339800 | -4.65105500 | 0.81186500  |
| F | -4.69861700 | -4.01665500 | -1.22498900 |
| F | -7.26258300 | 1.28793400  | -0.91157500 |
| F | -6.61647600 | 1.70730400  | 1.09888600  |
| F | -7.29700300 | 3.31981100  | -0.17605100 |
| F | -1.88110800 | 4.86272100  | -2.95727500 |
| F | -3.18306600 | 5.96622900  | -1.63026200 |
| F | -3.95250300 | 5.19412700  | -3.48703700 |
| C | 2.05820000  | -3.67931600 | 0.60898300  |
| C | 3.02843700  | -3.12786500 | 1.66058500  |
| C | 1.41704600  | -4.99383500 | 1.07012800  |
| H | 1.26559800  | -2.93763500 | 0.48260500  |
| H | 3.54059000  | -2.23711800 | 1.28694400  |
| H | 2.48230200  | -2.84929200 | 2.56285500  |
| H | 3.78037900  | -3.87282900 | 1.94082000  |
| H | 0.69696300  | -5.36176500 | 0.33316600  |
| H | 2.17649700  | -5.76904300 | 1.21773700  |
| H | 0.89567000  | -4.84252700 | 2.01863700  |
| C | 4.03178100  | 0.86849900  | -1.53616700 |
| C | 3.19044400  | -0.38173000 | -1.81099600 |
| H | 3.42050200  | 1.73159200  | -1.82323300 |
| C | 1.77262800  | -0.26281000 | -1.22949300 |
| H | 3.69712000  | -1.27846000 | -1.43359700 |
| C | 5.31243000  | 0.84644200  | -2.39082200 |

|                |              |              |              |
|----------------|--------------|--------------|--------------|
| C              | 5. 10047000  | 0. 62874800  | -3. 89019400 |
| H              | 5. 99274800  | 0. 07050400  | -2. 00693300 |
| H              | 5. 83617500  | 1. 79902700  | -2. 25616300 |
| C              | 6. 36702000  | 0. 92849700  | -4. 68893800 |
| H              | 4. 79273900  | -0. 40506500 | -4. 08702000 |
| H              | 4. 28086600  | 1. 27097200  | -4. 23894600 |
| H              | 6. 22202200  | 0. 74576900  | -5. 75688600 |
| H              | 6. 67000900  | 1. 97217400  | -4. 56280200 |
| H              | 7. 19742300  | 0. 30048600  | -4. 35044600 |
| O              | 1. 22356800  | 0. 90617800  | -1. 45074300 |
| H              | 3. 08087500  | -0. 49543900 | -2. 89518400 |
| C              | 1. 89888900  | 1. 30205400  | 2. 97608000  |
| C              | 3. 29065400  | 1. 06582100  | 0. 95978100  |
| C              | 2. 18464200  | 0. 26773100  | 1. 06278900  |
| N              | 1. 41058100  | 0. 39763100  | 2. 17593800  |
| O              | 1. 80020400  | -0. 68455700 | 0. 17985200  |
| S              | 3. 35030800  | 2. 05765300  | 2. 38925300  |
| C              | 4. 43112700  | 1. 02897800  | -0. 03901500 |
| H              | 5. 03876900  | 0. 14373900  | 0. 21143400  |
| C              | 1. 28070900  | 1. 64570500  | 4. 26558500  |
| C              | 0. 30347700  | 0. 78719300  | 4. 78128800  |
| C              | 1. 63490800  | 2. 79306800  | 4. 98048600  |
| C              | -0. 30907600 | 1. 07511200  | 5. 99280700  |
| H              | 0. 04422100  | -0. 10403800 | 4. 22231600  |
| C              | 1. 01988400  | 3. 07599100  | 6. 19517200  |
| H              | 2. 38137200  | 3. 47460500  | 4. 58086400  |
| C              | 0. 04617600  | 2. 22005700  | 6. 70409400  |
| H              | -1. 06420600 | 0. 39981900  | 6. 38265700  |
| H              | 1. 29726700  | 3. 97104500  | 6. 74242900  |
| H              | -0. 43392600 | 2. 44459200  | 7. 65115100  |
| C              | 5. 32129100  | 2. 24912100  | 0. 13668000  |
| C              | 4. 81161000  | 3. 52798200  | -0. 11291000 |
| C              | 6. 65355800  | 2. 11938000  | 0. 52535900  |
| C              | 5. 62170100  | 4. 64967600  | 0. 01976500  |
| H              | 3. 76915800  | 3. 63693900  | -0. 40298000 |
| C              | 7. 46750100  | 3. 24228000  | 0. 65994500  |
| H              | 7. 05701000  | 1. 12903700  | 0. 72088200  |
| C              | 6. 95390500  | 4. 50940000  | 0. 40551000  |
| H              | 5. 21249600  | 5. 63598500  | -0. 17515000 |
| H              | 8. 50268800  | 3. 12475100  | 0. 96458500  |
| H              | 7. 58619900  | 5. 38541600  | 0. 50914000  |
| <b>TS6(RR)</b> |              |              |              |
| O              | -0. 82508900 | 0. 94007700  | 0. 87947500  |

|   |             |             |             |
|---|-------------|-------------|-------------|
| N | 0.26839300  | -2.73267000 | -1.94241600 |
| N | -0.59476000 | -2.67401000 | -3.02079900 |
| N | -0.64433600 | -0.87209600 | -1.76025400 |
| C | 2.00885200  | -4.16964000 | -2.78416200 |
| H | 2.00925100  | -3.54637200 | -3.67243000 |
| C | 2.89252000  | -5.22912000 | -2.64169400 |
| H | 3.60445900  | -5.45408900 | -3.42838700 |
| C | 2.86200200  | -5.98770800 | -1.47241400 |
| H | 3.55956600  | -6.80824000 | -1.33733500 |
| C | 1.93753100  | -5.69722100 | -0.47657100 |
| H | 1.92181300  | -6.30485000 | 0.42369200  |
| C | 1.01651100  | -4.64761400 | -0.59955300 |
| C | 1.10054900  | -3.88151400 | -1.76721500 |
| C | 0.28161700  | -1.64683500 | -1.14528800 |
| C | -1.14070000 | -1.50867900 | -2.86365700 |
| C | -2.16636900 | -0.68422300 | -3.56375600 |
| H | -3.10648100 | -1.23254800 | -3.66738900 |
| H | -1.82987200 | -0.41625300 | -4.56756500 |
| C | -2.29283100 | 0.56041300  | -2.63575100 |
| H | -3.31118500 | 0.65510600  | -2.25742100 |
| H | -2.08389100 | 1.47903200  | -3.18522300 |
| C | -1.26640700 | 0.41506700  | -1.46240000 |
| H | -0.50118000 | 1.19587400  | -1.50375200 |
| C | -1.82656300 | 0.49744400  | 0.01011300  |
| C | -2.85760100 | 1.63108000  | 0.03880300  |
| C | -4.23440200 | 1.43185900  | 0.05841400  |
| C | -2.36184300 | 2.93774800  | 0.00966100  |
| C | -5.10177000 | 2.52301600  | 0.02720800  |
| H | -4.64915700 | 0.42921100  | 0.11049900  |
| C | -3.23957400 | 4.01430100  | -0.02521700 |
| H | -1.28604700 | 3.09503000  | 0.04102700  |
| C | -4.61749800 | 3.82204400  | -0.02015900 |
| C | -2.40365500 | -0.84125300 | 0.47989200  |
| C | -3.14878800 | -1.66994800 | -0.36398200 |
| C | -2.15859800 | -1.26662200 | 1.78383300  |
| C | -3.61542000 | -2.90013700 | 0.07890400  |
| H | -3.36689700 | -1.37862300 | -1.38457400 |
| C | -2.66014000 | -2.48881500 | 2.22887400  |
| H | -1.56482400 | -0.64355400 | 2.44336600  |
| C | -3.38647100 | -3.31869700 | 1.38529100  |
| H | -5.29612000 | 4.66604700  | -0.04115200 |
| H | -3.75213300 | -4.28004200 | 1.73237300  |
| H | -0.04288400 | 0.34907200  | 0.92384200  |
| C | -2.66311600 | 5.40081600  | -0.07761300 |

|   |             |             |             |
|---|-------------|-------------|-------------|
| C | -6.57995800 | 2.25231000  | 0.01499000  |
| C | -2.45663500 | -2.91027700 | 3.65801500  |
| C | -4.36375600 | -3.80872600 | -0.85547000 |
| F | -4.34557100 | -3.35147500 | -2.11681400 |
| F | -5.64688600 | -3.94095900 | -0.49393400 |
| F | -3.83038100 | -5.03830200 | -0.86036700 |
| F | -1.37847100 | -2.33546400 | 4.20172200  |
| F | -2.29763000 | -4.24276200 | 3.75257600  |
| F | -3.51054800 | -2.58930600 | 4.41992100  |
| F | -1.80513800 | 5.61810900  | 0.92506800  |
| F | -1.97474900 | 5.59568900  | -1.22082700 |
| F | -3.60939400 | 6.34557800  | -0.02040500 |
| F | -6.95084200 | 1.65736800  | -1.13044000 |
| F | -7.29862000 | 3.37424600  | 0.13697100  |
| F | -6.93478200 | 1.42780600  | 1.00992000  |
| C | -0.00498400 | -4.39787100 | 0.49885400  |
| C | 0.66392000  | -3.81288500 | 1.74919000  |
| C | -0.77581400 | -5.67838000 | 0.83980100  |
| H | -0.73284800 | -3.66488800 | 0.13224200  |
| H | 1.01642300  | -2.79176000 | 1.57844100  |
| H | -0.04369500 | -3.78806400 | 2.58221800  |
| H | 1.51404300  | -4.43254500 | 2.05796900  |
| H | -1.28786400 | -6.08284900 | -0.03696300 |
| H | -0.11398800 | -6.45236500 | 1.24089600  |
| H | -1.52038600 | -5.45985000 | 1.61031400  |
| C | 4.35165900  | -1.03439800 | 0.28160400  |
| C | 3.00999700  | -1.54929500 | -0.27164900 |
| H | 4.22294300  | -0.87670100 | 1.36120100  |
| C | 1.89676100  | -0.61399900 | 0.09080400  |
| H | 3.06266700  | -1.67549200 | -1.35842600 |
| C | 5.43857800  | -2.10105100 | 0.05920700  |
| C | 5.06705800  | -3.50831000 | 0.52871100  |
| H | 6.35177200  | -1.78574700 | 0.57590300  |
| H | 5.69044300  | -2.13388900 | -1.01205300 |
| C | 6.26272300  | -4.45600800 | 0.48879000  |
| H | 4.66400900  | -3.45839100 | 1.54956300  |
| H | 4.27033600  | -3.92068900 | -0.10027700 |
| H | 5.97905300  | -5.46603000 | 0.79646000  |
| H | 6.67449900  | -4.51788500 | -0.52380200 |
| H | 7.06272400  | -4.11285500 | 1.15179700  |
| O | 1.47194000  | -0.47719500 | 1.22123600  |
| H | 2.77609700  | -2.51513800 | 0.17938400  |
| C | 2.73815100  | 3.67670700  | -0.12652900 |
| C | 3.83653000  | 1.47724300  | -0.20957000 |

|   |             |            |             |
|---|-------------|------------|-------------|
| C | 2.49640000  | 1.53432200 | -0.48003200 |
| N | 1.87778300  | 2.74362900 | -0.43432100 |
| O | 1.74440000  | 0.44808000 | -0.83381100 |
| S | 4.35907000  | 3.09544600 | 0.13226000  |
| C | 4.80103100  | 0.31241400 | -0.36339900 |
| H | 4.88038800  | 0.11663700 | -1.44436700 |
| C | 2.39796900  | 5.10311700 | -0.00638500 |
| C | 1.13637700  | 5.54418400 | -0.41955000 |
| C | 3.31334600  | 6.02816300 | 0.50687400  |
| C | 0.80211200  | 6.88928200 | -0.32498200 |
| H | 0.43094900  | 4.82579800 | -0.82210600 |
| C | 2.97524100  | 7.37227000 | 0.59899600  |
| H | 4.29140400  | 5.69759400 | 0.84631000  |
| C | 1.71934600  | 7.80673200 | 0.18211500  |
| H | -0.17806500 | 7.21730200 | -0.65165100 |
| H | 3.69244200  | 8.08064200 | 1.00046000  |
| H | 1.45588300  | 8.85699200 | 0.25411600  |
| C | 6.18626400  | 0.70022700 | 0.12684400  |
| C | 6.40446600  | 0.97984200 | 1.48048700  |
| C | 7.26314700  | 0.76696000 | -0.75574200 |
| C | 7.67426300  | 1.31429700 | 1.93742900  |
| H | 5.57023300  | 0.94146900 | 2.17695700  |
| C | 8.53630100  | 1.10308000 | -0.30069600 |
| H | 7.10187500  | 0.55223100 | -1.80896700 |
| C | 8.74470600  | 1.37583900 | 1.04718300  |
| H | 7.82916400  | 1.52870900 | 2.99002500  |
| H | 9.36385100  | 1.15206700 | -1.00117300 |
| H | 9.73544500  | 1.63801800 | 1.40388100  |

**TS6(RS)**

|   |             |             |             |
|---|-------------|-------------|-------------|
| O | 1.37619200  | -0.02803700 | -1.86442400 |
| N | -1.56192000 | -1.23694300 | 1.74724200  |
| N | -0.72050700 | -1.19757800 | 2.84191100  |
| N | 0.12675400  | -0.21050400 | 1.06189000  |
| C | -3.69902800 | -1.24729300 | 2.85576400  |
| H | -3.33224600 | -0.40590400 | 3.43553400  |
| C | -4.97760500 | -1.75770300 | 3.04536800  |
| H | -5.63414200 | -1.32257200 | 3.79128200  |
| C | -5.40299000 | -2.82611600 | 2.26412500  |
| H | -6.40450900 | -3.22555800 | 2.38623400  |
| C | -4.54235400 | -3.40235000 | 1.33444900  |
| H | -4.89061000 | -4.24820600 | 0.75288600  |
| C | -3.23838500 | -2.93555000 | 1.14233000  |
| C | -2.85928900 | -1.82450700 | 1.90862600  |



|   |             |             |             |
|---|-------------|-------------|-------------|
| C | -1.09859000 | -0.61559300 | 0.64737500  |
| C | 0.30450000  | -0.55612800 | 2.37771200  |
| C | 1.57660600  | -0.01650800 | 2.93259500  |
| H | 2.28846700  | -0.82213500 | 3.12551500  |
| H | 1.40304700  | 0.50541500  | 3.87496000  |
| C | 2.01995100  | 0.94773900  | 1.79892600  |
| H | 3.09942600  | 0.94137500  | 1.64294200  |
| H | 1.74351200  | 1.97053900  | 2.06834400  |
| C | 1.23519300  | 0.57611900  | 0.50140300  |
| H | 0.80314000  | 1.46687200  | 0.04362700  |
| C | 2.04106300  | -0.14789700 | -0.64344800 |
| C | 3.31616600  | 0.68040700  | -0.85568800 |
| C | 4.61598100  | 0.19788500  | -0.75499100 |
| C | 3.12968100  | 2.02513300  | -1.19692300 |
| C | 5.70215600  | 1.05534800  | -0.94070200 |
| H | 4.80953500  | -0.84880700 | -0.54502600 |
| C | 4.21635000  | 2.87255900  | -1.35432300 |
| H | 2.12278600  | 2.40282100  | -1.35721800 |
| C | 5.51926700  | 2.39981100  | -1.22307200 |
| C | 2.28993800  | -1.61068800 | -0.27706100 |
| C | 3.05540000  | -1.97885500 | 0.82980100  |
| C | 1.68403800  | -2.62045500 | -1.02653600 |
| C | 3.19305900  | -3.31591300 | 1.19146200  |
| H | 3.57092400  | -1.22656700 | 1.41984600  |
| C | 1.84649000  | -3.95435800 | -0.66716900 |
| H | 1.07760100  | -2.36759400 | -1.88907700 |
| C | 2.59172000  | -4.32137200 | 0.44773900  |
| H | 6.36702300  | 3.06186600  | -1.35150800 |
| H | 2.69809600  | -5.36217900 | 0.73045400  |
| H | 0.47601400  | -0.42964300 | -1.86340700 |
| C | 3.94607900  | 4.32483600  | -1.63046600 |
| C | 7.08477400  | 0.48371200  | -0.79253700 |
| C | 1.24124800  | -5.01238300 | -1.54652100 |
| C | 4.01729800  | -3.63096200 | 2.40653500  |
| F | 3.54115100  | -2.98952900 | 3.49091300  |
| F | 5.28656300  | -3.22854500 | 2.25326800  |
| F | 4.03254700  | -4.93744600 | 2.68526700  |
| F | 2.01869700  | -5.28221700 | -2.60216100 |
| F | 0.04795700  | -4.62682400 | -2.02293000 |
| F | 1.05875800  | -6.16610800 | -0.88333100 |
| F | 3.35165000  | 4.91009600  | -0.56924100 |
| F | 5.06715400  | 5.00956800  | -1.88284700 |
| F | 3.11943400  | 4.48735500  | -2.66817200 |
| F | 7.26114100  | -0.58028000 | -1.58726400 |

|   |             |             |             |
|---|-------------|-------------|-------------|
| F | 7.30219000  | 0.06838600  | 0.46518300  |
| F | 8.03374500  | 1.37896200  | -1.09063100 |
| C | -2.25619000 | -3.65543500 | 0.23008400  |
| C | -2.94013200 | -4.59575300 | -0.76238500 |
| C | -1.25740800 | -4.43110600 | 1.10405400  |
| H | -1.69704700 | -2.91706600 | -0.35699400 |
| H | -3.71418300 | -4.08121000 | -1.34207400 |
| H | -2.19875700 | -4.98888700 | -1.45896900 |
| H | -3.40430100 | -5.44798600 | -0.25438100 |
| H | -0.66254400 | -3.75894500 | 1.73099000  |
| H | -1.79289300 | -5.12303000 | 1.76271400  |
| H | -0.57943600 | -5.01708800 | 0.47908100  |
| C | -3.99663000 | 0.38474400  | -2.18598500 |
| C | -3.25856600 | -0.53707300 | -1.19654100 |
| H | -3.30339900 | 0.65430600  | -2.99382800 |
| C | -1.75641100 | -0.38343600 | -1.34846600 |
| H | -3.58299100 | -0.32902900 | -0.17636500 |
| C | -5.18876600 | -0.33143000 | -2.82715900 |
| C | -4.75607900 | -1.37589700 | -3.85653800 |
| H | -5.84030200 | 0.40085900  | -3.32284400 |
| H | -5.79808100 | -0.80019800 | -2.04234700 |
| C | -5.93112800 | -2.19732600 | -4.37867700 |
| H | -4.25816300 | -0.86583400 | -4.69008500 |
| H | -4.00100100 | -2.04386700 | -3.42366400 |
| H | -5.60963100 | -2.92020600 | -5.13247900 |
| H | -6.41235700 | -2.75000900 | -3.56563400 |
| H | -6.68936400 | -1.55186400 | -4.83358900 |
| O | -1.07777400 | -1.18760800 | -1.98920000 |
| H | -3.47461600 | -1.58987100 | -1.39260800 |
| C | -1.63870000 | 3.79495800  | 0.40508100  |
| C | -3.21086100 | 2.33808600  | -0.80310500 |
| C | -1.89119100 | 1.97304000  | -0.80679200 |
| N | -1.02060200 | 2.78484000  | -0.13321300 |
| O | -1.31274200 | 0.94563900  | -1.47942600 |
| S | -3.35643700 | 3.79998100  | 0.12556100  |
| C | -4.39958600 | 1.72048400  | -1.49556800 |
| H | -4.70609300 | 2.40293200  | -2.30044900 |
| C | -0.94762900 | 4.84859500  | 1.16322300  |
| C | 0.42935800  | 5.01888800  | 0.97555800  |
| C | -1.62941300 | 5.67762500  | 2.05756600  |
| C | 1.11152300  | 6.00526800  | 1.67584400  |
| H | 0.95007000  | 4.38485000  | 0.26594700  |
| C | -0.94199500 | 6.66351400  | 2.75683700  |
| H | -2.69563300 | 5.54252400  | 2.21985300  |

|   |             |            |             |
|---|-------------|------------|-------------|
| C | 0.42797000  | 6.82896300 | 2.56872600  |
| H | 2.17593600  | 6.13610200 | 1.51060800  |
| H | -1.47760100 | 7.30092900 | 3.45260600  |
| H | 0.96072600  | 7.60180600 | 3.11310900  |
| C | -5.59920400 | 1.57888200 | -0.56754900 |
| C | -5.46634600 | 1.19395100 | 0.76994600  |
| C | -6.88289700 | 1.82336500 | -1.06426400 |
| C | -6.58797700 | 1.04158800 | 1.57961900  |
| H | -4.47667800 | 1.03440400 | 1.19143300  |
| C | -8.00572200 | 1.66940300 | -0.25826800 |
| H | -7.00127900 | 2.14612500 | -2.09558700 |
| C | -7.86095400 | 1.27468700 | 1.06883500  |
| H | -6.46200100 | 0.74793000 | 2.61658100  |
| H | -8.99249400 | 1.86675200 | -0.66493800 |
| H | -8.73398900 | 1.16175300 | 1.70356700  |

**TS6(SR)**

|   |             |             |             |
|---|-------------|-------------|-------------|
| O | 1.75108700  | 1.68976700  | -0.81955100 |
| N | -0.44956000 | -0.50415400 | 2.92169400  |
| N | 0.55433000  | -0.76556700 | 3.83181700  |
| N | 1.20468000  | 0.51987300  | 2.16378900  |
| C | -2.52766800 | -0.39659900 | 4.14222000  |
| H | -2.06746200 | 0.37943000  | 4.74685200  |
| C | -3.85427000 | -0.76844400 | 4.32650000  |
| H | -4.45284800 | -0.29016100 | 5.09502100  |
| C | -4.40380900 | -1.74209800 | 3.49821800  |
| H | -5.44349100 | -2.03063800 | 3.61583000  |
| C | -3.62503400 | -2.36385600 | 2.52514700  |
| H | -4.07130700 | -3.13210400 | 1.90342700  |
| C | -2.28225200 | -2.02515800 | 2.32924700  |
| C | -1.77454900 | -1.00549300 | 3.14513900  |
| C | -0.10211100 | 0.28152500  | 1.88719900  |
| C | 1.55740400  | -0.12417800 | 3.31922300  |
| C | 2.98815400  | 0.09208100  | 3.66896600  |
| H | 3.52010100  | -0.86184800 | 3.72026700  |
| H | 3.08523600  | 0.57526300  | 4.64317200  |
| C | 3.48858100  | 0.99708600  | 2.50738400  |
| H | 4.33046100  | 0.53394100  | 1.99290600  |
| H | 3.85091100  | 1.95239600  | 2.88908300  |
| C | 2.30008900  | 1.25472000  | 1.52135400  |
| H | 2.03570600  | 2.31558100  | 1.50560000  |
| C | 2.52016400  | 0.86830300  | 0.00528600  |
| C | 3.97861700  | 1.19614000  | -0.36659200 |
| C | 4.97996800  | 0.24669300  | -0.55348100 |

|   |              |              |              |
|---|--------------|--------------|--------------|
| C | 4. 30358400  | 2. 54816800  | -0. 51066400 |
| C | 6. 28150200  | 0. 64658300  | -0. 85567400 |
| H | 4. 76827500  | -0. 81420000 | -0. 47366400 |
| C | 5. 60551100  | 2. 93423000  | -0. 79995700 |
| H | 3. 51989900  | 3. 29328300  | -0. 42367000 |
| C | 6. 61114900  | 1. 98813000  | -0. 97529800 |
| C | 2. 18672400  | -0. 60455200 | -0. 23861900 |
| C | 2. 67752700  | -1. 61556500 | 0. 58677300  |
| C | 1. 38141200  | -0. 95561300 | -1. 32108100 |
| C | 2. 38979000  | -2. 95037000 | 0. 32626900  |
| H | 3. 30594900  | -1. 38170600 | 1. 44169900  |
| C | 1. 10959400  | -2. 29647600 | -1. 57921200 |
| H | 0. 97058700  | -0. 17131800 | -1. 94605100 |
| C | 1. 60908700  | -3. 30773200 | -0. 76514100 |
| H | 7. 62518300  | 2. 29207200  | -1. 20890600 |
| H | 1. 38719700  | -4. 34953900 | -0. 97052200 |
| H | 0. 92725100  | 2. 01214200  | -0. 36452000 |
| C | 5. 94348500  | 4. 39771100  | -0. 87054300 |
| C | 7. 32390500  | -0. 40718300 | -1. 10867400 |
| C | 0. 34533100  | -2. 67199700 | -2. 81727000 |
| C | 2. 99990000  | -3. 98725600 | 1. 22450100  |
| F | 2. 89060000  | -3. 63529300 | 2. 51720500  |
| F | 4. 30989700  | -4. 13367500 | 0. 97624900  |
| F | 2. 42670400  | -5. 18792000 | 1. 07623000  |
| F | -0. 50800100 | -1. 71829200 | -3. 19770400 |
| F | -0. 36011600 | -3. 80675800 | -2. 63801200 |
| F | 1. 17512100  | -2. 89873500 | -3. 84672800 |
| F | 4. 92303700  | 5. 12091400  | -1. 34622500 |
| F | 6. 23894100  | 4. 88626100  | 0. 34503600  |
| F | 7. 00741700  | 4. 62182700  | -1. 65295100 |
| F | 7. 27589600  | -0. 85358300 | -2. 37120000 |
| F | 7. 14846500  | -1. 47016900 | -0. 31004200 |
| F | 8. 56154700  | 0. 06032000  | -0. 89826400 |
| C | -1. 38715400 | -2. 77763700 | 1. 35832500  |
| C | -2. 16082300 | -3. 65404200 | 0. 37769800  |
| C | -0. 40948700 | -3. 64875400 | 2. 16547300  |
| H | -0. 81975400 | -2. 03965800 | 0. 77379700  |
| H | -2. 95012300 | -3. 09708300 | -0. 12830300 |
| H | -1. 47926400 | -4. 03108500 | -0. 39010800 |
| H | -2. 60455700 | -4. 51920700 | 0. 88356100  |
| H | 0. 28296900  | -3. 05596800 | 2. 76873000  |
| H | -0. 97183000 | -4. 30299600 | 2. 84031800  |
| H | 0. 17220200  | -4. 28655200 | 1. 49507100  |
| C | -3. 34725900 | 2. 89123400  | 0. 98047200  |

|   |             |             |             |
|---|-------------|-------------|-------------|
| C | -2.35946100 | 1.82432900  | 1.50016300  |
| H | -2.92396900 | 3.88429300  | 1.18131500  |
| C | -1.13654200 | 1.66547000  | 0.62076600  |
| H | -2.87355300 | 0.86384600  | 1.60548400  |
| C | -4.67519500 | 2.75546300  | 1.72969500  |
| C | -4.54287200 | 2.82598200  | 3.25156900  |
| H | -5.14224900 | 1.79615800  | 1.45452000  |
| H | -5.35831100 | 3.54704300  | 1.40250300  |
| C | -5.90003700 | 2.75473800  | 3.94550000  |
| H | -3.91749500 | 2.00139500  | 3.61095300  |
| H | -4.02889300 | 3.75633700  | 3.52704400  |
| H | -5.79814700 | 2.81054700  | 5.03266600  |
| H | -6.55014500 | 3.57527700  | 3.62661200  |
| H | -6.40742900 | 1.81498900  | 3.70314000  |
| O | -0.28620500 | 2.55946600  | 0.54666500  |
| H | -1.98960900 | 2.11724800  | 2.48514400  |
| C | -3.94887200 | -0.97854600 | -1.69223700 |
| C | -3.58254700 | 1.33536800  | -0.98405000 |
| C | -2.52278000 | 0.47302000  | -0.90344000 |
| N | -2.71496200 | -0.81334800 | -1.29996000 |
| O | -1.27228300 | 0.85687800  | -0.51035900 |
| S | -4.93550000 | 0.45797600  | -1.59606500 |
| C | -3.47633200 | 2.78077900  | -0.57035000 |
| H | -2.49523300 | 3.09421400  | -0.95299500 |
| C | -4.49036100 | -2.24122500 | -2.21598500 |
| C | -3.60585400 | -3.18478100 | -2.74993300 |
| C | -5.86009200 | -2.51967100 | -2.18471800 |
| C | -4.08848800 | -4.39120900 | -3.24031400 |
| H | -2.54849900 | -2.95147100 | -2.77404000 |
| C | -6.33864400 | -3.72543600 | -2.68486000 |
| H | -6.55186300 | -1.80074600 | -1.75375300 |
| C | -5.45484000 | -4.66462600 | -3.21118200 |
| H | -3.39356600 | -5.11657500 | -3.65107400 |
| H | -7.40274700 | -3.93560400 | -2.65508600 |
| H | -5.83057600 | -5.60685400 | -3.59676000 |
| C | -4.48934400 | 3.73002200  | -1.17833500 |
| C | -5.87012600 | 3.50577600  | -1.13651100 |
| C | -4.02813600 | 4.89812900  | -1.78947100 |
| C | -6.75763700 | 4.41696700  | -1.70159800 |
| H | -6.26498900 | 2.61868700  | -0.64949500 |
| C | -4.91263500 | 5.81490600  | -2.35022100 |
| H | -2.95857900 | 5.08699700  | -1.83079900 |
| C | -6.28232200 | 5.57454600  | -2.31106900 |
| H | -7.82435000 | 4.22081900  | -1.66209800 |

|   |             |            |             |
|---|-------------|------------|-------------|
| H | -4.52881700 | 6.71370700 | -2.82213500 |
| H | -6.97574900 | 6.28381100 | -2.75110700 |

**TS6(SS)**

|   |             |             |             |
|---|-------------|-------------|-------------|
| O | -1.25356000 | 1.12827400  | -1.10185800 |
| N | 0.45855100  | -3.42514100 | -0.93768800 |
| N | -0.60804900 | -4.22645700 | -1.30625800 |
| N | -0.96464900 | -2.08176100 | -1.64493900 |
| C | 2.20284500  | -5.01229900 | -1.38279500 |
| H | 1.66445800  | -5.23808300 | -2.29700200 |
| C | 3.39370600  | -5.65025800 | -1.07044300 |
| H | 3.80776000  | -6.39007300 | -1.74696500 |
| C | 4.04889900  | -5.32348800 | 0.11426700  |
| H | 4.98400000  | -5.80955100 | 0.37327000  |
| C | 3.49988900  | -4.37980300 | 0.97335700  |
| H | 4.01347400  | -4.15061600 | 1.90224600  |
| C | 2.29492500  | -3.72208000 | 0.69229800  |
| C | 1.67080500  | -4.05827900 | -0.51585400 |
| C | 0.29631000  | -2.10071500 | -1.13473400 |
| C | -1.46567400 | -3.35401100 | -1.72811200 |
| C | -2.85256800 | -3.37735300 | -2.26889500 |
| H | -3.53871000 | -3.84102100 | -1.55504800 |
| H | -2.90401800 | -3.95298400 | -3.19527800 |
| C | -3.15245300 | -1.86793800 | -2.49609300 |
| H | -4.04806000 | -1.56587400 | -1.95308200 |
| H | -3.34968500 | -1.66796300 | -3.55013000 |
| C | -1.90870800 | -1.03321700 | -2.03760000 |
| H | -1.48821900 | -0.47804900 | -2.88151200 |
| C | -2.14007500 | 0.06157800  | -0.91788800 |
| C | -3.52663000 | 0.68903400  | -1.13386800 |
| C | -3.67632900 | 1.53578800  | -2.23968900 |
| C | -4.62854200 | 0.45357600  | -0.32088600 |
| C | -4.90894100 | 2.09668400  | -2.53330900 |
| H | -2.81172900 | 1.76685000  | -2.85153500 |
| C | -5.86444200 | 1.02960100  | -0.62478600 |
| H | -4.54644500 | -0.16630000 | 0.56600800  |
| C | -6.02176700 | 1.84587700  | -1.73088300 |
| C | -1.99128700 | -0.54371900 | 0.47691200  |
| C | -1.20854700 | 0.09457400  | 1.43407600  |
| C | -2.61636500 | -1.74949300 | 0.80549000  |
| C | -1.07439000 | -0.47279800 | 2.70343300  |
| H | -0.69021700 | 1.01615200  | 1.17929100  |
| C | -2.45653300 | -2.31346400 | 2.06195200  |
| H | -3.23725000 | -2.26854000 | 0.08271800  |

|   |             |             |             |
|---|-------------|-------------|-------------|
| C | -1.69213400 | -1.67153000 | 3.03178700  |
| H | -6.98566100 | 2.28597100  | -1.96219600 |
| H | -1.56693400 | -2.11009900 | 4.01604800  |
| H | -0.36374900 | 0.83593000  | -1.38337800 |
| C | -7.03508300 | 0.70271900  | 0.25960700  |
| C | -5.06660200 | 3.02444800  | -3.70608500 |
| C | -3.13017800 | -3.61385600 | 2.39472600  |
| C | -0.27855900 | 0.25825700  | 3.74828800  |
| F | -0.99930000 | 1.23542700  | 4.32122000  |
| F | 0.81455100  | 0.83694400  | 3.23387100  |
| F | 0.12546100  | -0.56486500 | 4.73073200  |
| F | -4.18153000 | -3.43440600 | 3.20634400  |
| F | -2.29316500 | -4.45163100 | 3.02353300  |
| F | -3.57860300 | -4.23692200 | 1.29339100  |
| F | -7.42937400 | -0.56915300 | 0.08803900  |
| F | -6.72104700 | 0.83853400  | 1.55504900  |
| F | -8.08961100 | 1.48718400  | 0.00819100  |
| F | -4.01904500 | 2.96533700  | -4.53704200 |
| F | -5.19743900 | 4.29781200  | -3.31044800 |
| F | -6.16660200 | 2.72353200  | -4.41459900 |
| C | 1.70882100  | -2.75539300 | 1.70954900  |
| C | 2.75183700  | -1.77112500 | 2.24841100  |
| C | 1.08294000  | -3.54656700 | 2.86644800  |
| H | 0.92740200  | -2.16296700 | 1.22325000  |
| H | 3.26327800  | -1.24949300 | 1.43549500  |
| H | 2.26162600  | -1.01590200 | 2.86705100  |
| H | 3.50144700  | -2.27376800 | 2.86866100  |
| H | 0.22871500  | -4.14268100 | 2.53335700  |
| H | 1.82053200  | -4.22349300 | 3.31116300  |
| H | 0.74382100  | -2.85946200 | 3.64757100  |
| C | 4.23451800  | -0.09989200 | -1.82906700 |
| C | 2.99359100  | -1.00604100 | -1.68247600 |
| H | 4.02418000  | 0.63215500  | -2.62124100 |
| C | 1.76123800  | -0.20277700 | -1.40033600 |
| H | 3.15180800  | -1.74001200 | -0.88642700 |
| C | 5.44167200  | -0.95766800 | -2.24740400 |
| C | 5.21820500  | -1.86095100 | -3.46095700 |
| H | 5.74814500  | -1.57601700 | -1.38991900 |
| H | 6.28512700  | -0.29183300 | -2.45946100 |
| C | 6.53115700  | -2.45198000 | -3.96906100 |
| H | 4.53507300  | -2.67874900 | -3.20522800 |
| H | 4.73532700  | -1.28565700 | -4.26207200 |
| H | 6.36709400  | -3.12256900 | -4.81621400 |
| H | 7.21785200  | -1.66299900 | -4.29019300 |

|   |             |             |             |
|---|-------------|-------------|-------------|
| H | 7.02931400  | -3.02359400 | -3.17955900 |
| O | 1.14025100  | 0.41263300  | -2.23936400 |
| H | 2.81811700  | -1.53605900 | -2.62035700 |
| C | 2.13827000  | 3.31606100  | 1.11173400  |
| C | 3.50015200  | 1.59361200  | 0.00775000  |
| C | 2.18672100  | 1.30746500  | 0.25953800  |
| N | 1.42269000  | 2.25626700  | 0.85840900  |
| O | 1.59174600  | 0.11080900  | -0.04479300 |
| S | 3.79815100  | 3.19811800  | 0.60041400  |
| C | 4.58736800  | 0.67646300  | -0.52303300 |
| H | 4.75380600  | -0.09205900 | 0.24749200  |
| C | 1.61302000  | 4.50799100  | 1.79320900  |
| C | 0.49456900  | 4.37399600  | 2.62326500  |
| C | 2.20975800  | 5.76168600  | 1.63221500  |
| C | -0.01754200 | 5.48621000  | 3.27891000  |
| H | 0.05284900  | 3.39217400  | 2.75751000  |
| C | 1.69442000  | 6.87015300  | 2.29365600  |
| H | 3.06597500  | 5.87283600  | 0.97208200  |
| C | 0.57944800  | 6.73526600  | 3.11661200  |
| H | -0.88266200 | 5.37758900  | 3.92495300  |
| H | 2.15866800  | 7.84162800  | 2.15922100  |
| H | 0.17567400  | 7.60176900  | 3.63027600  |
| C | 5.89369900  | 1.43682200  | -0.68257200 |
| C | 6.00986600  | 2.45810900  | -1.63200000 |
| C | 7.00036300  | 1.12156000  | 0.10458700  |
| C | 7.20926700  | 3.14360600  | -1.79000600 |
| H | 5.15146000  | 2.72068200  | -2.24588800 |
| C | 8.20259500  | 1.80784600  | -0.05054700 |
| H | 6.91800800  | 0.33059000  | 0.84539800  |
| C | 8.31010100  | 2.81939300  | -0.99904800 |
| H | 7.28570600  | 3.93320300  | -2.53070000 |
| H | 9.05438400  | 1.55034500  | 0.57070800  |
| H | 9.24613100  | 3.35440700  | -1.12197200 |

**P(RR)**

|   |             |             |             |
|---|-------------|-------------|-------------|
| C | -2.41750400 | -0.84247200 | 0.22535600  |
| C | -1.92161500 | -2.24259400 | 0.64837000  |
| H | -2.53199400 | -0.82197400 | -0.86809200 |
| C | -1.21147700 | -2.91758600 | -0.49514100 |
| H | -1.26133600 | -2.15997300 | 1.51957400  |
| C | -3.78440100 | -0.53546100 | 0.84671900  |
| C | -4.93626400 | -1.29746000 | 0.19284500  |
| H | -3.98566100 | 0.53957500  | 0.76559500  |
| H | -3.74383300 | -0.76648100 | 1.92163500  |



|   |             |             |             |
|---|-------------|-------------|-------------|
| C | -6.26941200 | -1.03194700 | 0.88664300  |
| H | -5.00019900 | -0.99984400 | -0.86077800 |
| H | -4.73042200 | -2.37463600 | 0.19249500  |
| H | -7.08794600 | -1.56278500 | 0.39480200  |
| H | -6.23797000 | -1.35675700 | 1.93129400  |
| H | -6.50792200 | 0.03610400  | 0.87774800  |
| O | -1.59137800 | -3.91124800 | -1.04246000 |
| H | -2.75180300 | -2.89908200 | 0.91047100  |
| C | 2.47590100  | -0.31194200 | 0.09447000  |
| C | 0.02889400  | -0.18589200 | 0.29186500  |
| C | 0.55120700  | -1.26538600 | -0.36866000 |
| N | 1.90967500  | -1.33224000 | -0.47689700 |
| O | -0.10331600 | -2.28945200 | -0.99901900 |
| S | 1.35135300  | 0.81121200  | 0.81238600  |
| C | -1.38258600 | 0.23452800  | 0.61180000  |
| H | -1.44861900 | 0.35013500  | 1.70508800  |
| C | 3.93199900  | -0.10638600 | 0.13603800  |
| C | 4.76120600  | -1.03602500 | -0.50139600 |
| C | 4.50044400  | 0.98878800  | 0.79213100  |
| C | 6.13927800  | -0.86600600 | -0.48018200 |
| H | 4.30383800  | -1.88032000 | -1.00558700 |
| C | 5.88012800  | 1.15431300  | 0.81014100  |
| H | 3.86694300  | 1.71686300  | 1.29245300  |
| C | 6.70256700  | 0.22803700  | 0.17413800  |
| H | 6.77735500  | -1.58974900 | -0.97674100 |
| H | 6.31354200  | 2.00775100  | 1.32095700  |
| H | 7.77972700  | 0.35853900  | 0.18856000  |
| C | -1.70742600 | 1.58157800  | -0.01462200 |
| C | -1.56048000 | 1.76682100  | -1.39207400 |
| C | -2.16728200 | 2.64164500  | 0.76534400  |
| C | -1.87809300 | 2.98651300  | -1.97717300 |
| H | -1.18138100 | 0.95020700  | -2.00269200 |
| C | -2.48384800 | 3.86684300  | 0.18129100  |
| H | -2.28007600 | 2.50538800  | 1.83837100  |
| C | -2.34152300 | 4.04043800  | -1.19095400 |
| H | -1.75862200 | 3.11871100  | -3.04778300 |
| H | -2.83866800 | 4.68413500  | 0.80099100  |
| H | -2.58504900 | 4.99400800  | -1.64811900 |

**P(RS)**

|   |             |             |             |
|---|-------------|-------------|-------------|
| C | -2.35732900 | -0.88539800 | -0.46532100 |
| C | -2.16733600 | -1.42447200 | 0.96757000  |
| H | -2.11887600 | -1.69238300 | -1.17317400 |
| C | -1.29253400 | -2.64757300 | 0.96859000  |

|   |             |             |             |
|---|-------------|-------------|-------------|
| H | -1.73664100 | -0.65218800 | 1.61334900  |
| C | -3.81008800 | -0.47467400 | -0.72183400 |
| C | -4.75849800 | -1.66765200 | -0.84046500 |
| H | -3.86321800 | 0.10501200  | -1.65319300 |
| H | -4.14678800 | 0.19929800  | 0.07691600  |
| C | -6.20855300 | -1.23189200 | -1.03169000 |
| H | -4.44321600 | -2.29003900 | -1.68693400 |
| H | -4.68232800 | -2.30545600 | 0.04849800  |
| H | -6.87395200 | -2.09274400 | -1.13139200 |
| H | -6.55280000 | -0.63762500 | -0.17974400 |
| H | -6.31689500 | -0.61718900 | -1.93090200 |
| O | -1.62452500 | -3.72528100 | 1.36908000  |
| H | -3.11240600 | -1.73410800 | 1.41460800  |
| C | 2.49754800  | -0.33951700 | -0.22072000 |
| C | 0.05436000  | -0.20261000 | -0.46312500 |
| C | 0.57015100  | -1.36702900 | 0.04613700  |
| N | 1.92782400  | -1.43642000 | 0.17748300  |
| O | -0.05271300 | -2.53420400 | 0.39774800  |
| S | 1.38065500  | 0.87515900  | -0.77956500 |
| C | -1.34970500 | 0.25122300  | -0.76349500 |
| H | -1.41658300 | 0.44795000  | -1.84229700 |
| C | 3.95289400  | -0.12447800 | -0.19694500 |
| C | 4.77873200  | -1.16166300 | 0.25057600  |
| C | 4.52367000  | 1.08323500  | -0.60751300 |
| C | 6.15601700  | -0.98698600 | 0.28379700  |
| H | 4.32041000  | -2.09263200 | 0.56631800  |
| C | 5.90262800  | 1.25271700  | -0.57237600 |
| H | 3.89236700  | 1.89706000  | -0.95522600 |
| C | 6.72185400  | 0.21867300  | -0.12668100 |
| H | 6.79143300  | -1.79512400 | 0.63105600  |
| H | 6.33708000  | 2.19357100  | -0.89382800 |
| H | 7.79839600  | 0.35234100  | -0.09955900 |
| C | -1.69738800 | 1.55671400  | -0.05585400 |
| C | -1.23218600 | 1.85084200  | 1.22935600  |
| C | -2.52197300 | 2.48884600  | -0.69248600 |
| C | -1.60790000 | 3.02687300  | 1.87232100  |
| H | -0.54326200 | 1.16868400  | 1.72063000  |
| C | -2.89664400 | 3.66706800  | -0.05449800 |
| H | -2.86918400 | 2.29119900  | -1.70353400 |
| C | -2.44570000 | 3.93646900  | 1.23469500  |
| H | -1.23435600 | 3.23576100  | 2.86965200  |
| H | -3.53497000 | 4.37838400  | -0.56882500 |
| H | -2.73366500 | 4.85619700  | 1.73337400  |

**P(SR)**

|   |             |             |             |
|---|-------------|-------------|-------------|
| C | 2.31909900  | -1.16850600 | 0.17796800  |
| C | 1.55831700  | -2.51475500 | 0.13631700  |
| H | 3.32394800  | -1.32933800 | -0.23518700 |
| C | 1.07365400  | -2.91352600 | -1.24084100 |
| H | 0.70011500  | -2.46228900 | 0.81590800  |
| C | 2.46215200  | -0.69678300 | 1.62630500  |
| C | 3.09569500  | -1.73000000 | 2.55923500  |
| H | 1.46931700  | -0.41824500 | 2.01347000  |
| H | 3.07395400  | 0.21158700  | 1.64479200  |
| C | 3.36447200  | -1.15407900 | 3.94692500  |
| H | 2.44287000  | -2.60512800 | 2.65224600  |
| H | 4.03470500  | -2.08839300 | 2.11730900  |
| H | 3.79912600  | -1.90277700 | 4.61354300  |
| H | 4.05685600  | -0.30862000 | 3.89219300  |
| H | 2.43721300  | -0.79516900 | 4.40468100  |
| O | 1.61961700  | -3.70478600 | -1.95336400 |
| H | 2.21311200  | -3.32163200 | 0.46689500  |
| C | -2.29882700 | -0.10155900 | -0.25377900 |
| C | 0.12739300  | -0.19235500 | -0.59591100 |
| C | -0.61643300 | -1.25633500 | -1.02185600 |
| N | -1.95994900 | -1.21589700 | -0.83819700 |
| O | -0.09394500 | -2.33642800 | -1.68116200 |
| S | -0.95574600 | 0.96200100  | 0.09876200  |
| C | 1.62390400  | -0.13716900 | -0.76435700 |
| H | 1.79008200  | -0.52641200 | -1.77974500 |
| C | -3.68620600 | 0.25088700  | 0.08325300  |
| C | -4.71451700 | -0.60905700 | -0.31907200 |
| C | -3.99972300 | 1.41426400  | 0.79189200  |
| C | -6.03467100 | -0.30337300 | -0.01529000 |
| H | -4.45623500 | -1.50726900 | -0.86914000 |
| C | -5.32272500 | 1.71607600  | 1.09194200  |
| H | -3.21056400 | 2.08766700  | 1.11641300  |
| C | -6.34333600 | 0.85854600  | 0.68966900  |
| H | -6.82708300 | -0.97379200 | -0.33176600 |
| H | -5.55650700 | 2.62100500  | 1.64284600  |
| H | -7.37602400 | 1.09468700  | 0.92500500  |
| C | 2.25229600  | 1.24195200  | -0.74154400 |
| C | 2.03209000  | 2.16527900  | 0.28679400  |
| C | 3.11418300  | 1.60114200  | -1.78014000 |
| C | 2.64877800  | 3.41262700  | 0.26704000  |
| H | 1.38516200  | 1.90942700  | 1.12106000  |
| C | 3.73646200  | 2.84556000  | -1.80093900 |
| H | 3.29445000  | 0.89574000  | -2.58719700 |

|   |             |             |              |
|---|-------------|-------------|--------------|
| C | 3. 50281300 | 3. 75750900 | -0. 77686500 |
| H | 2. 46242300 | 4. 11568600 | 1. 07253400  |
| H | 4. 39811200 | 3. 10312500 | -2. 62160200 |
| H | 3. 98192500 | 4. 73103400 | -0. 79132600 |

**P(SS)**

|   |              |              |              |
|---|--------------|--------------|--------------|
| C | 2. 41754200  | -0. 84252200 | 0. 22524600  |
| C | 1. 92161000  | -2. 24268500 | 0. 64805600  |
| H | 2. 53218900  | -0. 82190500 | -0. 86818600 |
| C | 1. 21140600  | -2. 91751500 | -0. 49551700 |
| H | 1. 26141400  | -2. 16017300 | 1. 51933700  |
| C | 3. 78433400  | -0. 53557200 | 0. 84688100  |
| C | 4. 93635600  | -1. 29743200 | 0. 19313600  |
| H | 3. 74356400  | -0. 76673900 | 1. 92176400  |
| H | 3. 98559300  | 0. 53948500  | 0. 76594900  |
| C | 6. 26934600  | -1. 03195800 | 0. 88725100  |
| H | 4. 73057400  | -2. 37461900 | 0. 19260600  |
| H | 5. 00049800  | -0. 99966600 | -0. 86043600 |
| H | 7. 08800600  | -1. 56269800 | 0. 39550800  |
| H | 6. 50781400  | 0. 03610700  | 0. 87855600  |
| H | 6. 23769400  | -1. 35691500 | 1. 93185300  |
| O | 1. 59125100  | -3. 91114100 | -1. 04295500 |
| H | 2. 75178600  | -2. 89925800 | 0. 91000400  |
| C | -2. 47591800 | -0. 31189800 | 0. 09449800  |
| C | -0. 02890300 | -0. 18591200 | 0. 29182900  |
| C | -0. 55125600 | -1. 26531100 | -0. 36881800 |
| N | -1. 90972800 | -1. 33214200 | -0. 47702100 |
| O | 0. 10325800  | -2. 28929300 | -0. 99932800 |
| S | -1. 35132600 | 0. 81114600  | 0. 81252600  |
| C | 1. 38259700  | 0. 23446800  | 0. 61170600  |
| H | 1. 44867100  | 0. 35006900  | 1. 70499800  |
| C | -3. 93201000 | -0. 10632900 | 0. 13614600  |
| C | -4. 76126400 | -1. 03609000 | -0. 50104800 |
| C | -4. 50040400 | 0. 98898000  | 0. 79206800  |
| C | -6. 13934100 | -0. 86606500 | -0. 47975800 |
| H | -4. 30393000 | -1. 88048300 | -1. 00511400 |
| C | -5. 88008500 | 1. 15450500  | 0. 81016100  |
| H | -3. 86685200 | 1. 71717900  | 1. 29215900  |
| C | -6. 70257800 | 0. 22809900  | 0. 17440000  |
| H | -6. 77746000 | -1. 58990700 | -0. 97612700 |
| H | -6. 31346100 | 2. 00805100  | 1. 32083500  |
| H | -7. 77974100 | 0. 35860400  | 0. 18888400  |
| C | 1. 70743600  | 1. 58152200  | -0. 01472000 |
| C | 1. 55997800  | 1. 76692200  | -1. 39209300 |

|   |            |            |             |
|---|------------|------------|-------------|
| C | 2.16784400 | 2.64142200 | 0.76516100  |
| C | 1.87764400 | 2.98659700 | -1.97721400 |
| H | 1.18041800 | 0.95045300 | -2.00262900 |
| C | 2.48447400 | 3.86659200 | 0.18108900  |
| H | 2.28103000 | 2.50504000 | 1.83813700  |
| C | 2.34164300 | 4.04033900 | -1.19109200 |
| H | 1.75776500 | 3.11891900 | -3.04776700 |
| H | 2.83973600 | 4.68374600 | 0.80072400  |
| H | 2.58521300 | 4.99389500 | -1.64827300 |

### Stereoselective TS optimized in solvent

#### TS3(RR)\_SMD

|   |             |             |             |
|---|-------------|-------------|-------------|
| O | -1.06044100 | 1.02072500  | 1.26683500  |
| N | -0.30150700 | -3.26428700 | -1.35527100 |
| N | -1.27282600 | -3.06705500 | -2.31415500 |
| N | -0.98107700 | -1.23542100 | -1.08151100 |
| C | 1.20639300  | -4.82867800 | -2.39440500 |
| H | 1.24742900  | -4.14447600 | -3.23669100 |
| C | 1.94490700  | -6.00608200 | -2.37930400 |
| H | 2.57872400  | -6.26324300 | -3.22135700 |
| C | 1.86864900  | -6.83847200 | -1.26770700 |
| H | 2.45066000  | -7.75402800 | -1.23479800 |
| C | 1.04172800  | -6.51168800 | -0.19526200 |
| H | 0.99174700  | -7.18610700 | 0.65251200  |
| C | 0.27227700  | -5.34536900 | -0.18816500 |
| C | 0.39945400  | -4.50940100 | -1.30660800 |
| C | -0.03568600 | -2.13343500 | -0.64111000 |
| C | -1.65278100 | -1.84999600 | -2.11646900 |
| C | -2.51099200 | -0.89346300 | -2.86328800 |
| H | -3.55639400 | -0.97824300 | -2.55809200 |
| H | -2.45644000 | -1.07581500 | -3.93695600 |
| C | -1.87002000 | 0.45236100  | -2.45487500 |
| H | -2.60532400 | 1.25426600  | -2.39473200 |
| H | -1.13520500 | 0.74680800  | -3.20784100 |
| C | -1.12146600 | 0.24001900  | -1.09877400 |
| H | -0.11185300 | 0.66087900  | -1.13349800 |
| C | -1.87016300 | 0.89749100  | 0.12937100  |
| C | -2.25141000 | 2.34342400  | -0.24291900 |
| C | -3.49127600 | 2.91775500  | 0.01039900  |
| C | -1.21766600 | 3.16942900  | -0.70947300 |
| C | -3.70464600 | 4.27494700  | -0.24425900 |
| H | -4.30596900 | 2.33153900  | 0.42298500  |
| C | -1.44064100 | 4.51631400  | -0.94623500 |
| H | -0.21564100 | 2.77173900  | -0.85453000 |

|   |             |             |             |
|---|-------------|-------------|-------------|
| C | -2.69358100 | 5.08701800  | -0.72835400 |
| C | -3.01879200 | -0.02374800 | 0.51356200  |
| C | -4.20807900 | -0.09474500 | -0.20771000 |
| C | -2.80157800 | -0.94047000 | 1.54637100  |
| C | -5.16184600 | -1.06383400 | 0.09918100  |
| H | -4.40329900 | 0.59095900  | -1.02857500 |
| C | -3.76888800 | -1.89180300 | 1.84769700  |
| H | -1.85974500 | -0.90752500 | 2.08624300  |
| C | -4.95842600 | -1.96991700 | 1.12998400  |
| H | -2.86950300 | 6.13849400  | -0.92565000 |
| H | -5.70071200 | -2.72546700 | 1.36055000  |
| H | -0.18721700 | 1.36363400  | 1.00766100  |
| C | -0.29544000 | 5.38872100  | -1.37890900 |
| C | -5.06832100 | 4.83601200  | 0.04208300  |
| C | -3.52347200 | -2.82638200 | 2.99821900  |
| C | -6.41890400 | -1.09410300 | -0.72022500 |
| F | -6.13736900 | -1.05717100 | -2.03751000 |
| F | -7.20039800 | -0.03390500 | -0.46929900 |
| F | -7.14593200 | -2.19343800 | -0.49635200 |
| F | -3.77577300 | -2.24214200 | 4.17687500  |
| F | -2.24611600 | -3.23949200 | 3.03446600  |
| F | -4.29600200 | -3.92265600 | 2.92832800  |
| F | 0.63289500  | 4.69633500  | -2.05100200 |
| F | -0.71166700 | 6.38743700  | -2.17249000 |
| F | 0.31928000  | 5.95646400  | -0.32913200 |
| F | -6.02588800 | 4.12008800  | -0.56948800 |
| F | -5.19101400 | 6.10442200  | -0.36816200 |
| F | -5.34699300 | 4.80806700  | 1.35357900  |
| C | -0.70273700 | -5.01493600 | 0.92923400  |
| C | -0.44832000 | -5.80476000 | 2.21076300  |
| C | -2.13944400 | -5.24588800 | 0.43709000  |
| H | -0.59063000 | -3.95254400 | 1.17433300  |
| H | 0.58280200  | -5.68860700 | 2.55838600  |
| H | -1.11377200 | -5.44249300 | 2.99769100  |
| H | -0.65193800 | -6.87217000 | 2.07338100  |
| H | -2.37036600 | -4.64750500 | -0.44972100 |
| H | -2.28356600 | -6.30008800 | 0.17650200  |
| H | -2.85601800 | -4.99135600 | 1.22274100  |
| C | 3.31154900  | -2.03704600 | 1.00401500  |
| C | 2.23589800  | -2.54032500 | 0.29421700  |
| H | 3.10722600  | -1.27693800 | 1.75391100  |
| C | 0.98432800  | -1.90867100 | 0.30879100  |
| H | 2.41629200  | -3.35467600 | -0.40539700 |
| C | 4.59665500  | -2.79690400 | 1.13959800  |

|   |            |             |             |
|---|------------|-------------|-------------|
| C | 4.55704200 | -3.80939400 | 2.29398200  |
| H | 5.42826500 | -2.09910400 | 1.30902200  |
| H | 4.82187500 | -3.32896000 | 0.20443900  |
| C | 5.88656000 | -4.53473500 | 2.47067700  |
| H | 4.28760500 | -3.29011900 | 3.22150700  |
| H | 3.75437300 | -4.53178400 | 2.09949000  |
| H | 5.84291500 | -5.26156500 | 3.28688100  |
| H | 6.16459400 | -5.07172100 | 1.55764600  |
| H | 6.69147200 | -3.82721800 | 2.69611800  |
| O | 0.74405900 | -0.91621000 | 1.20176000  |
| H | 1.16306700 | -0.06611400 | 0.87426300  |
| C | 4.24090800 | 3.20756500  | 0.80115700  |
| C | 3.86296500 | 0.93401000  | -0.05609800 |
| C | 2.69662500 | 1.70564000  | 0.27658600  |
| N | 2.96572100 | 2.97963200  | 0.73107800  |
| O | 1.51008200 | 1.27645600  | 0.16258600  |
| S | 5.28915100 | 1.88833900  | 0.29612300  |
| C | 3.74885800 | -0.31060700 | -0.66280600 |
| H | 2.72865500 | -0.51450700 | -0.97826500 |
| C | 4.79624300 | 4.49350600  | 1.24037100  |
| C | 3.93936700 | 5.59933300  | 1.31797200  |
| C | 6.14613700 | 4.63669000  | 1.57756900  |
| C | 4.43425800 | 6.82990200  | 1.72758800  |
| H | 2.89728700 | 5.47500700  | 1.04245000  |
| C | 6.63434700 | 5.87103400  | 1.98790900  |
| H | 6.81456400 | 3.78074400  | 1.53555000  |
| C | 5.78005300 | 6.96862500  | 2.06389600  |
| H | 3.76949300 | 7.68589500  | 1.78284800  |
| H | 7.68127300 | 5.97534000  | 2.25322300  |
| H | 6.16291100 | 7.93217400  | 2.38520100  |
| C | 4.77650200 | -1.06908400 | -1.37462600 |
| C | 6.14978900 | -0.97356400 | -1.10855600 |
| C | 4.34982600 | -1.98528700 | -2.35144400 |
| C | 7.06199500 | -1.75766400 | -1.80755800 |
| H | 6.51505700 | -0.31012600 | -0.33130800 |
| C | 5.25999300 | -2.76733700 | -3.04662400 |
| H | 3.28487300 | -2.07567900 | -2.55259500 |
| C | 6.62426900 | -2.65432000 | -2.77795500 |
| H | 8.12096000 | -1.67186400 | -1.58561900 |
| H | 4.90774800 | -3.46610800 | -3.79925400 |
| H | 7.34034100 | -3.26481100 | -3.31876600 |

**TS3(RS)\_SMD**

|   |             |             |             |
|---|-------------|-------------|-------------|
| O | -1.41595400 | -0.15460200 | -2.08460300 |
|---|-------------|-------------|-------------|

|   |              |              |              |
|---|--------------|--------------|--------------|
| N | 1. 70060400  | 1. 38932900  | 0. 97156100  |
| N | 0. 89357300  | 1. 50158400  | 2. 08647000  |
| N | 0. 00439200  | 0. 14307300  | 0. 58284300  |
| C | 3. 92836300  | 1. 83494000  | 1. 78057700  |
| H | 3. 76975500  | 1. 03045700  | 2. 49031400  |
| C | 5. 13675400  | 2. 51479900  | 1. 71990500  |
| H | 5. 93972900  | 2. 25880700  | 2. 40327200  |
| C | 5. 30446200  | 3. 51874000  | 0. 76842300  |
| H | 6. 24922900  | 4. 04781500  | 0. 69462800  |
| C | 4. 25705800  | 3. 85944600  | -0. 07781500 |
| H | 4. 39608200  | 4. 66277900  | -0. 79585900 |
| C | 3. 01753100  | 3. 20932700  | -0. 02540600 |
| C | 2. 89874600  | 2. 16552700  | 0. 89955800  |
| C | 1. 21533800  | 0. 49642200  | 0. 06306300  |
| C | -0. 10994300 | 0. 73167300  | 1. 81764300  |
| C | -1. 29113900 | 0. 20912500  | 2. 56458200  |
| H | -2. 05897800 | 0. 97621900  | 2. 68290800  |
| H | -0. 99066700 | -0. 12205300 | 3. 56236200  |
| C | -1. 72574900 | -0. 97892300 | 1. 66675300  |
| H | -2. 80760500 | -1. 10696900 | 1. 61945000  |
| H | -1. 30258700 | -1. 90121500 | 2. 06848200  |
| C | -1. 10022300 | -0. 77473500 | 0. 26164200  |
| H | -0. 66669600 | -1. 71044400 | -0. 09561100 |
| C | -2. 06211100 | -0. 21758100 | -0. 84688700 |
| C | -3. 21502600 | -1. 22992100 | -1. 01112800 |
| C | -4. 56176500 | -0. 88535000 | -1. 00558900 |
| C | -2. 87353200 | -2. 56244700 | -1. 28737300 |
| C | -5. 54447500 | -1. 85367700 | -1. 22440700 |
| H | -4. 87683500 | 0. 14138600  | -0. 85393700 |
| C | -3. 85885900 | -3. 51398200 | -1. 49803300 |
| H | -1. 83316800 | -2. 86437500 | -1. 36686900 |
| C | -5. 21066200 | -3. 17418800 | -1. 46225300 |
| C | -2. 53884600 | 1. 19525600  | -0. 48236400 |
| C | -3. 40107800 | 1. 46146600  | 0. 58093800  |
| C | -2. 07037000 | 2. 27530200  | -1. 23591500 |
| C | -3. 75491700 | 2. 77071800  | 0. 90194600  |
| H | -3. 82259100 | 0. 65464800  | 1. 17271900  |
| C | -2. 44852700 | 3. 57400200  | -0. 91863200 |
| H | -1. 42299700 | 2. 07847000  | -2. 08207700 |
| C | -3. 28528800 | 3. 84276900  | 0. 16025800  |
| H | -5. 97661900 | -3. 92189400 | -1. 63667800 |
| H | -3. 56893100 | 4. 85966200  | 0. 40947900  |
| H | 1. 20054200  | -1. 89830100 | -1. 58620300 |
| C | -3. 48506400 | -4. 95039500 | -1. 73371000 |



|   |             |             |             |
|---|-------------|-------------|-------------|
| C | -6.98077400 | -1.41864000 | -1.17646100 |
| C | -2.01693200 | 4.71801200  | -1.78928600 |
| C | -4.63452500 | 2.98577200  | 2.09843200  |
| F | -4.00099400 | 2.63370900  | 3.23338100  |
| F | -5.74480100 | 2.23690300  | 2.03573700  |
| F | -5.00976800 | 4.26192900  | 2.23171300  |
| F | -0.95589900 | 4.40231900  | -2.54815600 |
| F | -1.68571900 | 5.79624200  | -1.06047200 |
| F | -2.99648000 | 5.10090200  | -2.62065000 |
| F | -2.23403600 | -5.07921900 | -2.18720700 |
| F | -3.57444700 | -5.67061100 | -0.60339900 |
| F | -4.30465000 | -5.52887600 | -2.62503600 |
| F | -7.32002400 | -1.00185400 | 0.05511000  |
| F | -7.82159300 | -2.40434400 | -1.51083000 |
| F | -7.21108800 | -0.38913700 | -2.00509200 |
| C | 1.89116500  | 3.67085900  | -0.93342600 |
| C | 2.24170200  | 3.46155800  | -2.41054000 |
| C | 1.56674500  | 5.14296400  | -0.64968000 |
| H | 0.99415500  | 3.08181200  | -0.70906500 |
| H | 2.44934300  | 2.40954500  | -2.62576200 |
| H | 1.40990400  | 3.78323800  | -3.04290800 |
| H | 3.12156800  | 4.05070600  | -2.69122000 |
| H | 1.24900700  | 5.28544900  | 0.38735900  |
| H | 2.44143700  | 5.77747100  | -0.82493100 |
| H | 0.76873000  | 5.49077400  | -1.30753300 |
| C | 3.83137200  | -0.79831500 | -2.26798400 |
| C | 3.18547500  | 0.07855900  | -1.41324200 |
| H | 3.20244000  | -1.47225400 | -2.84695400 |
| C | 1.83755100  | -0.07700000 | -1.08145800 |
| H | 3.79198000  | 0.79820900  | -0.86944500 |
| C | 5.17891100  | -0.48698300 | -2.85387200 |
| C | 5.06886300  | 0.37239300  | -4.12106600 |
| H | 5.70848500  | -1.41658800 | -3.10111700 |
| H | 5.79980400  | 0.03809200  | -2.11649700 |
| C | 6.43087500  | 0.63638400  | -4.75413400 |
| H | 4.41107900  | -0.12640300 | -4.84297500 |
| H | 4.58253700  | 1.32145000  | -3.86357700 |
| H | 6.34383400  | 1.25930800  | -5.64887300 |
| H | 7.09635000  | 1.14883400  | -4.05158600 |
| H | 6.91631300  | -0.30107200 | -5.04474500 |
| O | 1.04325800  | -0.88907300 | -1.84121400 |
| H | -0.47520200 | -0.46071100 | -2.02572500 |
| C | 1.82066800  | -2.14752700 | 2.30286400  |
| C | 3.29746500  | -2.38056500 | 0.35208400  |

|   |              |              |              |
|---|--------------|--------------|--------------|
| C | 1. 93313700  | -2. 76790900 | 0. 16663700  |
| N | 1. 15089600  | -2. 65460000 | 1. 31468200  |
| O | 1. 43473400  | -3. 12826800 | -0. 94170300 |
| S | 3. 50078800  | -1. 77811500 | 1. 98404000  |
| C | 4. 25946200  | -2. 43623100 | -0. 65420400 |
| H | 4. 01182300  | -3. 13128500 | -1. 45328800 |
| C | 1. 22899400  | -1. 89595700 | 3. 62513700  |
| C | 0. 19402100  | -2. 72951300 | 4. 06891700  |
| C | 1. 64285700  | -0. 82214600 | 4. 42037000  |
| C | -0. 42140800 | -2. 48544200 | 5. 28982500  |
| H | -0. 10791200 | -3. 56544800 | 3. 44547300  |
| C | 1. 02246200  | -0. 58223600 | 5. 64294000  |
| H | 2. 42337900  | -0. 15188100 | 4. 07104300  |
| C | -0. 01010500 | -1. 40967400 | 6. 07761600  |
| H | -1. 21909000 | -3. 13761000 | 5. 63074100  |
| H | 1. 33906600  | 0. 25904100  | 6. 25053800  |
| H | -0. 49369600 | -1. 21893500 | 7. 03033200  |
| C | 5. 69062900  | -2. 18746600 | -0. 42139000 |
| C | 6. 14089200  | -1. 09122700 | 0. 32939600  |
| C | 6. 64246100  | -3. 03843800 | -0. 99731600 |
| C | 7. 49993800  | -0. 87202500 | 0. 51954000  |
| H | 5. 42183400  | -0. 37677200 | 0. 72376200  |
| C | 8. 00230400  | -2. 82150300 | -0. 80130400 |
| H | 6. 30660100  | -3. 88068800 | -1. 59622300 |
| C | 8. 43622700  | -1. 73994900 | -0. 03908100 |
| H | 7. 82999500  | -0. 01229100 | 1. 09484200  |
| H | 8. 72483300  | -3. 49735300 | -1. 24802500 |
| H | 9. 49741000  | -1. 56801900 | 0. 11017000  |

### TS3(SR)\_SMD

|   |              |              |              |
|---|--------------|--------------|--------------|
| O | 2. 24913700  | 1. 83843400  | -0. 94415100 |
| N | -0. 88297700 | 0. 03216900  | 2. 64997500  |
| N | 0. 03826300  | -0. 54196600 | 3. 50549200  |
| N | 1. 05392100  | 0. 51516200  | 1. 83665300  |
| C | -3. 23617800 | 0. 26666100  | 3. 25139800  |
| H | -2. 99727000 | 1. 23380600  | 3. 67996500  |
| C | -4. 52847400 | -0. 23880300 | 3. 31056800  |
| H | -5. 32239200 | 0. 34798200  | 3. 75917400  |
| C | -4. 78280000 | -1. 50667200 | 2. 79846100  |
| H | -5. 78623900 | -1. 91994100 | 2. 83380500  |
| C | -3. 75293800 | -2. 26713600 | 2. 25448500  |
| H | -3. 97652800 | -3. 26089400 | 1. 87716400  |
| C | -2. 44063300 | -1. 78898500 | 2. 18520900  |
| C | -2. 22326200 | -0. 49004900 | 2. 67159500  |

|   |             |             |             |
|---|-------------|-------------|-------------|
| C | -0.28625300 | 0.73068300  | 1.64021300  |
| C | 1.17536900  | -0.22980500 | 2.98494800  |
| C | 2.59368800  | -0.40157200 | 3.39424300  |
| H | 2.91260400  | -1.43515600 | 3.23217400  |
| H | 2.72180000  | -0.17849400 | 4.45413700  |
| C | 3.32326300  | 0.61171600  | 2.47777200  |
| H | 4.21948200  | 0.17705200  | 2.03663500  |
| H | 3.64910900  | 1.47594300  | 3.05931100  |
| C | 2.32635800  | 1.10183800  | 1.37153500  |
| H | 2.22527700  | 2.19169000  | 1.40592700  |
| C | 2.72303400  | 0.80282100  | -0.13770800 |
| C | 4.25061100  | 0.91155100  | -0.26517900 |
| C | 5.10219500  | -0.15770100 | -0.51740800 |
| C | 4.80246100  | 2.19051400  | -0.11761000 |
| C | 6.48214600  | 0.04585800  | -0.59567000 |
| H | 4.71305500  | -1.15982700 | -0.66453000 |
| C | 6.17392700  | 2.37731000  | -0.18712900 |
| H | 4.14490500  | 3.04143500  | 0.02277100  |
| C | 7.03199600  | 1.30510400  | -0.42626600 |
| C | 2.18846100  | -0.56031100 | -0.56349300 |
| C | 2.43777100  | -1.68888400 | 0.21451900  |
| C | 1.42441100  | -0.69730400 | -1.72154500 |
| C | 1.94036700  | -2.93319900 | -0.15524400 |
| H | 3.04269200  | -1.61709800 | 1.11339100  |
| C | 0.93164100  | -1.94595800 | -2.08488000 |
| H | 1.21815500  | 0.16816400  | -2.33970100 |
| C | 1.18784800  | -3.07515700 | -1.31338100 |
| H | 8.10389800  | 1.45567700  | -0.48871700 |
| H | 0.80247000  | -4.04525400 | -1.61010200 |
| H | 1.26954700  | 1.91200200  | -0.80273100 |
| C | 6.76569400  | 3.73985400  | 0.04614000  |
| C | 7.36264900  | -1.13179900 | -0.91139800 |
| C | 0.12600900  | -2.13019100 | -3.34465100 |
| C | 2.29533100  | -4.11484600 | 0.69820400  |
| F | 1.43540800  | -5.13039400 | 0.54549600  |
| F | 2.29994100  | -3.78135000 | 2.00489300  |
| F | 3.51838600  | -4.58297300 | 0.41817400  |
| F | 0.05844500  | -1.02063500 | -4.07664000 |
| F | -1.11678700 | -2.54336300 | -3.07793800 |
| F | 0.68963700  | -3.08660200 | -4.11131800 |
| F | 5.87350500  | 4.71524700  | -0.15893700 |
| F | 7.20758300  | 3.86299100  | 1.30835600  |
| F | 7.81419000  | 3.96306600  | -0.75709000 |
| F | 7.00942900  | -2.20651700 | -0.19028800 |

|   |             |             |             |
|---|-------------|-------------|-------------|
| F | 8.65047000  | -0.87250100 | -0.65323800 |
| F | 7.27189500  | -1.48033100 | -2.20122200 |
| C | -1.30630100 | -2.70281500 | 1.74699000  |
| C | -1.64048300 | -3.56414900 | 0.52848300  |
| C | -0.91858500 | -3.60225700 | 2.93304700  |
| H | -0.43687300 | -2.08568900 | 1.48226600  |
| H | -1.83102200 | -2.95296700 | -0.35735000 |
| H | -0.79897900 | -4.23275600 | 0.32862600  |
| H | -2.51262200 | -4.20009700 | 0.71163300  |
| H | -0.64778800 | -3.01238300 | 3.81132800  |
| H | -1.76331900 | -4.24812000 | 3.19633400  |
| H | -0.07381800 | -4.24042400 | 2.66100200  |
| C | -2.32516000 | 3.54130600  | 0.26799500  |
| C | -1.91296600 | 2.48107100  | 1.05039000  |
| H | -1.66329100 | 3.84022800  | -0.54098200 |
| C | -0.89035000 | 1.59875900  | 0.69229800  |
| H | -2.40723600 | 2.32233600  | 2.00437200  |
| C | -3.21704900 | 4.60174900  | 0.85404800  |
| C | -2.45425700 | 5.57934500  | 1.76011700  |
| H | -4.02513700 | 4.13161200  | 1.43301200  |
| H | -3.70588500 | 5.17564900  | 0.05842300  |
| C | -3.36080100 | 6.66786500  | 2.32781900  |
| H | -1.98077000 | 5.01921900  | 2.57576700  |
| H | -1.63725200 | 6.03343500  | 1.18634000  |
| H | -2.80822200 | 7.36047000  | 2.96822500  |
| H | -3.82299200 | 7.24822200  | 1.52322200  |
| H | -4.16830600 | 6.23041300  | 2.92389400  |
| O | -0.26480500 | 1.74535900  | -0.50931500 |
| H | -0.77294400 | 1.14344500  | -1.23268800 |
| C | -4.29338000 | -1.30404000 | -0.96518100 |
| C | -3.62249100 | 1.03442100  | -1.24689500 |
| C | -2.62860800 | 0.04325300  | -1.57208000 |
| N | -3.07956300 | -1.25931100 | -1.41144800 |
| O | -1.47842600 | 0.29200800  | -2.03405800 |
| S | -5.05927100 | 0.24210200  | -0.64544300 |
| C | -3.43967900 | 2.38219500  | -1.50604900 |
| H | -2.53517500 | 2.56418200  | -2.08273000 |
| C | -5.02476900 | -2.56269500 | -0.76482200 |
| C | -4.49018100 | -3.74527000 | -1.28932100 |
| C | -6.22831700 | -2.60579900 | -0.05307500 |
| C | -5.14025000 | -4.95542700 | -1.07589700 |
| H | -3.56762100 | -3.68971400 | -1.85863100 |
| C | -6.87366900 | -3.81778000 | 0.15862300  |
| H | -6.65106400 | -1.69105200 | 0.35407100  |

|   |             |             |             |
|---|-------------|-------------|-------------|
| C | -6.32715200 | -4.99622300 | -0.34674600 |
| H | -4.72134800 | -5.86990400 | -1.48317400 |
| H | -7.80296300 | -3.84409300 | 0.71838700  |
| H | -6.83060700 | -5.94292900 | -0.17964000 |
| C | -4.48564000 | 3.40042800  | -1.63547200 |
| C | -5.65971900 | 3.40674300  | -0.86830000 |
| C | -4.28580500 | 4.44281800  | -2.55290700 |
| C | -6.60880400 | 4.40829200  | -1.03305000 |
| H | -5.81435900 | 2.65071000  | -0.10508500 |
| C | -5.23593900 | 5.44297400  | -2.71791900 |
| H | -3.37376500 | 4.45738200  | -3.14344700 |
| C | -6.40496000 | 5.42797300  | -1.96017000 |
| H | -7.50805700 | 4.39887300  | -0.42550800 |
| H | -5.06352500 | 6.23565000  | -3.43889400 |
| H | -7.14722800 | 6.20940000  | -2.08501900 |

**TS3(SS)\_SMD**

|   |             |             |             |
|---|-------------|-------------|-------------|
| O | 1.96031800  | -0.09741900 | 2.03402900  |
| N | -0.73783800 | -3.81321400 | -0.10440100 |
| N | 0.27240700  | -4.58446400 | -0.64611300 |
| N | 1.08396800  | -2.69159500 | 0.20203800  |
| C | -2.84082500 | -4.95756100 | 0.31171500  |
| H | -2.43453300 | -5.26864800 | 1.26931800  |
| C | -4.09548300 | -5.37778000 | -0.10910600 |
| H | -4.69584400 | -6.01863000 | 0.52785100  |
| C | -4.56156300 | -4.98252900 | -1.36247300 |
| H | -5.53390800 | -5.31659500 | -1.71128400 |
| C | -3.78524700 | -4.16304900 | -2.17281700 |
| H | -4.16215400 | -3.86707300 | -3.14788100 |
| C | -2.51711200 | -3.72055400 | -1.77398400 |
| C | -2.07409100 | -4.13712300 | -0.51323200 |
| C | -0.27011500 | -2.65456700 | 0.45238100  |
| C | 1.33687900  | -3.89318700 | -0.42814700 |
| C | 2.79423300  | -4.15624700 | -0.57792700 |
| H | 3.06175700  | -4.47110800 | -1.58728400 |
| H | 3.08694600  | -4.95081200 | 0.11481500  |
| C | 3.39809500  | -2.80068100 | -0.17982700 |
| H | 3.59027100  | -2.20035200 | -1.07274000 |
| H | 4.34490900  | -2.90499100 | 0.34960600  |
| C | 2.35020000  | -2.09236500 | 0.71876000  |
| H | 2.45991400  | -2.43351200 | 1.75525700  |
| C | 2.51064800  | -0.53771400 | 0.82218800  |
| C | 4.02167800  | -0.28391900 | 0.95582000  |
| C | 4.83062100  | 0.01928800  | -0.13853200 |

|   |             |             |             |
|---|-------------|-------------|-------------|
| C | 4.60741200  | -0.40036000 | 2.21618500  |
| C | 6.20287300  | 0.17796400  | 0.02736500  |
| H | 4.39699700  | 0.14968400  | -1.12593000 |
| C | 5.98102200  | -0.23277600 | 2.36714300  |
| H | 3.98108800  | -0.59657400 | 3.08013300  |
| C | 6.79515100  | 0.05155700  | 1.27818300  |
| C | 1.95028700  | 0.26935600  | -0.35163400 |
| C | 1.65839400  | -0.26322200 | -1.60584800 |
| C | 1.77280700  | 1.63878200  | -0.14756200 |
| C | 1.20343300  | 0.56578500  | -2.62795700 |
| H | 1.77211400  | -1.32129600 | -1.80944400 |
| C | 1.31462800  | 2.45116700  | -1.17657400 |
| H | 1.98685000  | 2.06186700  | 0.82956600  |
| C | 1.02334200  | 1.92708300  | -2.42853300 |
| H | 7.86306600  | 0.19038200  | 1.40365200  |
| H | 0.65590100  | 2.56284200  | -3.22628500 |
| H | 0.98180300  | -0.14502100 | 1.91022200  |
| C | 6.58245300  | -0.40823700 | 3.73287800  |
| C | 7.05559500  | 0.42868200  | -1.18359500 |
| C | 1.20206500  | 3.92780200  | -0.92995700 |
| C | 0.98108800  | -0.00310200 | -3.99753900 |
| F | -0.07009100 | 0.55409000  | -4.61378400 |
| F | 0.77141400  | -1.33218900 | -3.96274200 |
| F | 2.04489800  | 0.19559300  | -4.79387700 |
| F | 0.63492700  | 4.20627300  | 0.24774900  |
| F | 0.49182600  | 4.54510000  | -1.88776900 |
| F | 2.41696700  | 4.50784500  | -0.91716600 |
| F | 5.83140100  | 0.16659500  | 4.68162500  |
| F | 6.68768800  | -1.70814100 | 4.05772000  |
| F | 7.81168100  | 0.11787900  | 3.81157800  |
| F | 7.36039200  | -0.72123200 | -1.80976500 |
| F | 8.21407300  | 1.02198600  | -0.86867600 |
| F | 6.43024600  | 1.20277400  | -2.08037900 |
| C | -1.66367400 | -2.89737500 | -2.72196200 |
| C | -2.35511800 | -1.59199900 | -3.12535100 |
| C | -1.29963500 | -3.74437800 | -3.94785700 |
| H | -0.72993400 | -2.63151100 | -2.21385100 |
| H | -2.43736300 | -0.90751300 | -2.27589800 |
| H | -1.77476700 | -1.08407200 | -3.89941800 |
| H | -3.35702500 | -1.77534800 | -3.52665600 |
| H | -0.79208200 | -4.66661000 | -3.64894000 |
| H | -2.19568100 | -4.01782900 | -4.51531800 |
| H | -0.63967700 | -3.18249700 | -4.61348000 |
| C | -2.96353600 | -0.78724100 | 2.29210600  |

|   |             |             |             |
|---|-------------|-------------|-------------|
| C | -2.24999000 | -1.83121900 | 1.72411400  |
| H | -2.44401300 | 0.16229900  | 2.38790800  |
| C | -1.00623400 | -1.64669100 | 1.10910900  |
| H | -2.69483200 | -2.82389000 | 1.71998800  |
| C | -4.09513500 | -1.02810000 | 3.24894200  |
| C | -3.60817500 | -1.26404200 | 4.68548100  |
| H | -4.69012400 | -1.89198200 | 2.92146800  |
| H | -4.77516300 | -0.16531100 | 3.24567400  |
| C | -4.76284600 | -1.45009000 | 5.66407600  |
| H | -2.95696700 | -2.14654000 | 4.69877300  |
| H | -2.98565300 | -0.41737900 | 4.99899800  |
| H | -4.40250800 | -1.63111100 | 6.68082400  |
| H | -5.40230000 | -0.56166200 | 5.68918000  |
| H | -5.38969600 | -2.29981000 | 5.37369800  |
| O | -0.41932800 | -0.41655700 | 1.16205500  |
| H | -0.78828900 | 0.16845700  | 0.37679000  |
| C | -3.12911400 | 3.72253900  | 0.07699300  |
| C | -3.57846900 | 1.30837500  | 0.19935600  |
| C | -2.29647700 | 1.69834300  | -0.32239500 |
| N | -2.11429500 | 3.07322100  | -0.40009800 |
| O | -1.39461200 | 0.88851500  | -0.67440100 |
| S | -4.47201100 | 2.73914100  | 0.65501800  |
| C | -3.92842900 | -0.03354400 | 0.30768500  |
| H | -3.22575700 | -0.67312600 | -0.21973800 |
| C | -3.20480100 | 5.18955100  | 0.14125200  |
| C | -2.19183600 | 5.94671000  | -0.45942400 |
| C | -4.25684600 | 5.84230000  | 0.79347200  |
| C | -2.23772500 | 7.33376200  | -0.40808800 |
| H | -1.38196200 | 5.43267100  | -0.96216100 |
| C | -4.29739100 | 7.23001800  | 0.84176000  |
| H | -5.04525000 | 5.27037500  | 1.27522600  |
| C | -3.28820200 | 7.97920400  | 0.24134600  |
| H | -1.45015600 | 7.91407600  | -0.87812900 |
| H | -5.11658100 | 7.72623700  | 1.35179300  |
| H | -3.32050700 | 9.06352100  | 0.27966800  |
| C | -5.25659900 | -0.62578700 | 0.49918800  |
| C | -6.37024300 | 0.05789300  | 1.00482300  |
| C | -5.39769200 | -1.98812400 | 0.18936400  |
| C | -7.58608000 | -0.59764200 | 1.17658300  |
| H | -6.30248100 | 1.10435500  | 1.28062500  |
| C | -6.60965600 | -2.64079000 | 0.36083700  |
| H | -4.53183600 | -2.53169400 | -0.18148200 |
| C | -7.71291300 | -1.94545500 | 0.85542800  |
| H | -8.43700400 | -0.04920200 | 1.56828700  |

|   |             |             |            |
|---|-------------|-------------|------------|
| H | -6.69218400 | -3.69454900 | 0.11239700 |
| H | -8.66265500 | -2.45214700 | 0.99459300 |

### Different substituents

#### 3(S1)

|   |             |             |             |
|---|-------------|-------------|-------------|
| O | -0.83808400 | -0.44272400 | -1.49252700 |
| N | 1.01947200  | 2.34763100  | 1.87259800  |
| N | 0.00874600  | 2.41308600  | 2.79563100  |
| N | -0.35237400 | 0.82986400  | 1.30008900  |
| C | 2.84793800  | 3.05083300  | 3.25683100  |
| H | 2.44951200  | 2.37270800  | 4.00415500  |
| C | 4.00181500  | 3.78480400  | 3.48800500  |
| H | 4.52567400  | 3.68952800  | 4.43252000  |
| C | 4.47824400  | 4.63263400  | 2.49051500  |
| H | 5.38601300  | 5.20502000  | 2.65107400  |
| C | 3.79319300  | 4.74985700  | 1.28784400  |
| H | 4.17369900  | 5.42176300  | 0.52420400  |
| C | 2.62070800  | 4.03108500  | 1.02209000  |
| C | 2.18429400  | 3.17742700  | 2.03812900  |
| C | 0.83410400  | 1.37076600  | 0.97222700  |
| C | -0.80927500 | 1.47974100  | 2.41411800  |
| C | -2.07503100 | 0.87960900  | 2.92104700  |
| H | -2.91821400 | 1.54328700  | 2.71258100  |
| H | -2.03041700 | 0.71858900  | 3.99887100  |
| C | -2.12995700 | -0.45123500 | 2.12321500  |
| H | -3.14278600 | -0.70740900 | 1.81082100  |
| H | -1.77378400 | -1.27316400 | 2.75037900  |
| C | -1.17062100 | -0.33267200 | 0.89946700  |
| H | -0.50776100 | -1.19868500 | 0.83785800  |
| C | -1.80472900 | -0.17118800 | -0.53054900 |
| C | -2.87819200 | -1.25684500 | -0.70276600 |
| C | -4.14364500 | -1.00870600 | -1.22784300 |
| C | -2.53222000 | -2.57557200 | -0.38599000 |
| C | -5.05798200 | -2.04897900 | -1.39019200 |
| H | -4.43816600 | -0.00733500 | -1.52186300 |
| C | -3.45953300 | -3.59902500 | -0.53804800 |
| H | -1.52631800 | -2.81896000 | -0.04443200 |
| C | -4.73423700 | -3.35007900 | -1.03592600 |
| C | -2.35259700 | 1.25279000  | -0.66253400 |
| C | -3.44855300 | 1.68461700  | 0.08408600  |
| C | -1.70138300 | 2.17496100  | -1.48475300 |
| C | -3.86813600 | 3.01106800  | 0.03456900  |
| H | -4.00583300 | 0.98606800  | 0.70283300  |
| C | -2.14888600 | 3.49158800  | -1.54557800 |



|   |             |             |             |
|---|-------------|-------------|-------------|
| H | -0.83348000 | 1.86817800  | -2.05952300 |
| C | -3.22575600 | 3.93035500  | -0.78158800 |
| H | -5.45288000 | -4.15283100 | -1.15439200 |
| H | -3.55523000 | 4.96223800  | -0.82335900 |
| H | 0.15640900  | -1.91512100 | -1.95241500 |
| C | -3.08007500 | -4.98537200 | -0.09887000 |
| C | -6.39852000 | -1.74738400 | -2.00103200 |
| C | -1.49815800 | 4.44584800  | -2.50798500 |
| C | -5.01435400 | 3.41335300  | 0.91722300  |
| F | -4.67495700 | 3.30349800  | 2.21774700  |
| F | -6.07524300 | 2.61744600  | 0.73362800  |
| F | -5.40091400 | 4.67435900  | 0.70997700  |
| F | -0.20603600 | 4.14513200  | -2.70563100 |
| F | -1.55761900 | 5.71091300  | -2.06223300 |
| F | -2.09646700 | 4.42122400  | -3.70482200 |
| F | -1.80692900 | -5.26793100 | -0.39945400 |
| F | -3.20053500 | -5.12014100 | 1.23743600  |
| F | -3.85567500 | -5.92052600 | -0.65824000 |
| F | -6.86107600 | -0.55526100 | -1.59620900 |
| F | -7.31065000 | -2.67210600 | -1.67276400 |
| F | -6.33286300 | -1.70876900 | -3.33843000 |
| C | 1.89803800  | 4.23475300  | -0.29782400 |
| C | 2.80112900  | 3.89307300  | -1.48785300 |
| C | 1.38288200  | 5.67739100  | -0.38858200 |
| H | 1.03408700  | 3.56279600  | -0.34694300 |
| H | 3.16204700  | 2.86454900  | -1.41945300 |
| H | 2.23932100  | 3.99824900  | -2.41837000 |
| H | 3.66247100  | 4.56790300  | -1.53176700 |
| H | 0.70018100  | 5.90858300  | 0.43407000  |
| H | 2.21355900  | 6.38919000  | -0.34672500 |
| H | 0.85542400  | 5.83045400  | -1.33133100 |
| C | 4.09800200  | 0.14872200  | -0.61735200 |
| C | 3.01730400  | 0.70539100  | 0.26792800  |
| H | 4.26353900  | 0.84225400  | -1.45694800 |
| C | 1.74871300  | 0.94941100  | -0.12733900 |
| H | 3.26108500  | 0.85808500  | 1.31557700  |
| C | 5.41469900  | 0.07966000  | 0.16701600  |
| C | 5.89191300  | 1.46747500  | 0.60195100  |
| H | 6.19076600  | -0.39002900 | -0.44628100 |
| H | 5.28811300  | -0.55821800 | 1.05558500  |
| C | 7.18086800  | 1.41841200  | 1.41652800  |
| H | 6.04050000  | 2.08308200  | -0.29542400 |
| H | 5.11199500  | 1.97343600  | 1.18543800  |
| H | 7.50451300  | 2.42042400  | 1.71217500  |

|   |             |             |             |
|---|-------------|-------------|-------------|
| H | 7.04194800  | 0.82901400  | 2.32864800  |
| H | 7.99191200  | 0.95673900  | 0.84499200  |
| O | 1.22353600  | 0.85281700  | -1.31328100 |
| H | 0.04884200  | 0.14248500  | -1.38899000 |
| C | 1.41415800  | -2.99513000 | 1.37050000  |
| C | 2.79323100  | -2.05542000 | -0.43047000 |
| C | 1.52814900  | -2.45773300 | -0.76938100 |
| N | 0.76091600  | -2.97902900 | 0.24050800  |
| O | 1.02966000  | -2.35239300 | -2.01157400 |
| S | 3.04545300  | -2.40887800 | 1.24855000  |
| C | 3.65320900  | -1.19515800 | -1.30784800 |
| H | 2.95412400  | -0.89033500 | -2.09580200 |
| C | 0.78976400  | -3.40942900 | 2.63563200  |
| C | -0.40070400 | -4.14658800 | 2.58798300  |
| C | 1.31450800  | -3.03237400 | 3.87568500  |
| C | -1.06072200 | -4.48463400 | 3.76288300  |
| H | -0.78092900 | -4.46627500 | 1.62430100  |
| C | 0.65703100  | -3.38480600 | 5.04939400  |
| H | 2.23023300  | -2.44868300 | 3.92142200  |
| C | -0.53476900 | -4.10434100 | 4.99681400  |
| H | -1.98225000 | -5.05520500 | 3.70861000  |
| H | 1.07205800  | -3.08859200 | 6.00742900  |
| H | -1.04824500 | -4.37274000 | 5.91438800  |
| C | 4.82579100  | -1.88809000 | -1.97457300 |
| C | 5.44191600  | -3.02163900 | -1.44582400 |
| C | 5.35739200  | -1.33424300 | -3.14253900 |
| C | 6.56039100  | -3.57717600 | -2.06197200 |
| H | 5.04304300  | -3.48286800 | -0.54672700 |
| C | 6.47480900  | -1.88880800 | -3.75430600 |
| H | 4.88482000  | -0.45612000 | -3.57698000 |
| C | 7.09624600  | -3.02216500 | -3.22401700 |
| H | 7.02401100  | -4.46143500 | -1.63158900 |
| H | 6.86860700  | -1.44031200 | -4.66305300 |
| C | 8.28493600  | -3.64734100 | -3.90847700 |
| H | 8.93137200  | -4.15932800 | -3.19120400 |
| H | 7.96521200  | -4.38710500 | -4.65009200 |
| H | 8.88237300  | -2.89576900 | -4.43084900 |

**TS4(S1)**

|   |             |            |             |
|---|-------------|------------|-------------|
| O | -0.41186800 | 0.07809600 | -0.43728600 |
| N | 1.08646400  | 3.48335400 | 1.52596400  |
| N | -0.01353800 | 3.98107000 | 2.17067800  |
| N | -0.28682200 | 1.87840700 | 1.56186300  |
| C | 3.30561000  | 4.05150600 | 2.28063400  |

|   |              |              |              |
|---|--------------|--------------|--------------|
| H | 3. 15592100  | 3. 33641600  | 3. 08427700  |
| C | 4. 48750900  | 4. 76654200  | 2. 14794700  |
| H | 5. 29631800  | 4. 61646200  | 2. 85407900  |
| C | 4. 61909700  | 5. 67728300  | 1. 10067600  |
| H | 5. 53902800  | 6. 24164200  | 0. 98738500  |
| C | 3. 58207200  | 5. 86771300  | 0. 19574100  |
| H | 3. 70445100  | 6. 57853700  | -0. 61621200 |
| C | 2. 37925600  | 5. 16043900  | 0. 29756200  |
| C | 2. 28262300  | 4. 26292300  | 1. 35990800  |
| C | 0. 94256900  | 2. 21034500  | 1. 16535900  |
| C | -0. 83083700 | 2. 96902100  | 2. 18108900  |
| C | -2. 16956900 | 2. 63864000  | 2. 75647400  |
| H | -2. 97101900 | 3. 02376300  | 2. 11885700  |
| H | -2. 29016200 | 3. 05938300  | 3. 75482600  |
| C | -2. 10574400 | 1. 08618900  | 2. 76834400  |
| H | -3. 08003900 | 0. 61679500  | 2. 62969600  |
| H | -1. 70167600 | 0. 75944300  | 3. 72906400  |
| C | -1. 08643500 | 0. 65734600  | 1. 68657600  |
| H | -0. 41236200 | -0. 10935800 | 2. 04830300  |
| C | -1. 60401500 | 0. 18956100  | 0. 30183100  |
| C | -2. 23307800 | -1. 20114300 | 0. 44617000  |
| C | -3. 39351300 | -1. 59208300 | -0. 21920600 |
| C | -1. 52989500 | -2. 16444800 | 1. 18180400  |
| C | -3. 87233400 | -2. 89526800 | -0. 09227500 |
| H | -3. 92620600 | -0. 90136600 | -0. 86518400 |
| C | -2. 04029100 | -3. 44708200 | 1. 32565800  |
| H | -0. 55629700 | -1. 94570300 | 1. 61785100  |
| C | -3. 22144200 | -3. 82870000 | 0. 70057600  |
| C | -2. 50498100 | 1. 26523400  | -0. 30166900 |
| C | -3. 82735200 | 1. 44549000  | 0. 10755600  |
| C | -1. 95278500 | 2. 17087300  | -1. 21243800 |
| C | -4. 57608600 | 2. 51446700  | -0. 37409900 |
| H | -4. 29312300 | 0. 75211400  | 0. 80164500  |
| C | -2. 72187500 | 3. 22300600  | -1. 70093000 |
| H | -0. 92293700 | 2. 04081500  | -1. 53605600 |
| C | -4. 03547200 | 3. 41141200  | -1. 28577100 |
| H | -3. 59558400 | -4. 84173600 | 0. 78850100  |
| H | -4. 62923000 | 4. 23240000  | -1. 67212500 |
| H | 1. 80623200  | 0. 84959900  | -2. 36101300 |
| C | -1. 28718800 | -4. 40543500 | 2. 20705600  |
| C | -5. 11397800 | -3. 27225800 | -0. 84968800 |
| C | -2. 10711500 | 4. 21592900  | -2. 64843400 |
| C | -5. 95254500 | 2. 73443200  | 0. 18663500  |
| F | -5. 87759200 | 3. 32620700  | 1. 39198000  |

|   |             |             |             |
|---|-------------|-------------|-------------|
| F | -6.60563500 | 1.57882000  | 0.36000100  |
| F | -6.69688200 | 3.51809800  | -0.59905500 |
| F | -1.55401800 | 5.24268200  | -1.97308600 |
| F | -3.01971000 | 4.74167600  | -3.47392900 |
| F | -1.13992200 | 3.66955100  | -3.38947900 |
| F | 0.03085000  | -4.36675400 | 1.97208200  |
| F | -1.45388200 | -4.09304500 | 3.50529800  |
| F | -1.69978100 | -5.66971600 | 2.05014800  |
| F | -6.20837100 | -2.71064500 | -0.31372600 |
| F | -5.31040700 | -4.59600700 | -0.86951800 |
| F | -5.04982400 | -2.85108900 | -2.12372700 |
| C | 1.25925800  | 5.38126800  | -0.69879400 |
| C | 1.72316000  | 5.07151400  | -2.12546800 |
| C | 0.72030300  | 6.81121200  | -0.57550700 |
| H | 0.44031800  | 4.69301000  | -0.46142300 |
| H | 2.10051800  | 4.04825500  | -2.19121600 |
| H | 0.88615300  | 5.18087800  | -2.81883800 |
| H | 2.51574500  | 5.75829200  | -2.43989500 |
| H | 0.35448900  | 7.00595400  | 0.43637800  |
| H | 1.50454600  | 7.54146700  | -0.80049300 |
| H | -0.09925500 | 6.96721900  | -1.28007900 |
| C | 3.91167200  | -0.25562200 | 0.45516200  |
| C | 2.70635900  | 0.46902300  | 1.04771800  |
| H | 4.76451800  | 0.44108800  | 0.44698100  |
| C | 1.96873500  | 1.44357800  | 0.32567300  |
| H | 2.88559300  | 0.84854400  | 2.05975700  |
| C | 4.31366400  | -1.44010400 | 1.34869200  |
| C | 4.69228100  | -1.04888500 | 2.77756600  |
| H | 5.16716700  | -1.95321500 | 0.88933600  |
| H | 3.48814300  | -2.16071400 | 1.40431900  |
| C | 5.14780600  | -2.25861900 | 3.58954100  |
| H | 5.49043000  | -0.29496900 | 2.75143100  |
| H | 3.83999400  | -0.58022600 | 3.28420900  |
| H | 5.39702400  | -1.98498300 | 4.61849200  |
| H | 4.35837900  | -3.01698400 | 3.62143500  |
| H | 6.03115000  | -2.72267500 | 3.13984100  |
| O | 1.97612300  | 1.80520300  | -0.85534700 |
| H | -0.55616000 | -0.45371500 | -1.24020400 |
| C | 0.50127700  | -2.89293000 | -1.63226000 |
| C | 2.44105800  | -1.41227300 | -1.32984700 |
| C | 1.48339800  | -1.00872600 | -2.22873100 |
| N | 0.40514100  | -1.83420800 | -2.39310600 |
| O | 1.47706900  | 0.13607100  | -2.93888400 |
| S | 1.90735400  | -2.90410900 | -0.61753300 |

|   |              |              |              |
|---|--------------|--------------|--------------|
| C | 3. 71783300  | -0. 67152200 | -1. 03561400 |
| H | 3. 61033100  | 0. 26792700  | -1. 58559800 |
| C | -0. 49530300 | -3. 97621800 | -1. 64755400 |
| C | -1. 63947700 | -3. 82794500 | -2. 44154800 |
| C | -0. 31739800 | -5. 15691800 | -0. 91849400 |
| C | -2. 58793400 | -4. 84198500 | -2. 49832300 |
| H | -1. 76379100 | -2. 91336400 | -3. 01191400 |
| C | -1. 27569900 | -6. 16343300 | -0. 96821400 |
| H | 0. 56854900  | -5. 28950200 | -0. 30446800 |
| C | -2. 41358000 | -6. 00928800 | -1. 75711100 |
| H | -3. 47489600 | -4. 71403600 | -3. 11001300 |
| H | -1. 13148500 | -7. 06841200 | -0. 38732300 |
| H | -3. 16227500 | -6. 79417400 | -1. 79581000 |
| C | 4. 98583300  | -1. 31836700 | -1. 58858700 |
| C | 5. 09130000  | -2. 65931600 | -1. 95075900 |
| C | 6. 12306600  | -0. 51374000 | -1. 73163800 |
| C | 6. 29504400  | -3. 18003600 | -2. 42428300 |
| H | 4. 23001500  | -3. 31379400 | -1. 87653100 |
| C | 7. 32024700  | -1. 03385000 | -2. 20269200 |
| H | 6. 06351200  | 0. 54202200  | -1. 47608600 |
| C | 7. 42836900  | -2. 38184800 | -2. 55754700 |
| H | 6. 34822200  | -4. 23067800 | -2. 69822200 |
| H | 8. 18584100  | -0. 38369400 | -2. 30536800 |
| C | 1. 23020100  | -0. 76072600 | 3. 56109200  |
| O | 1. 10776800  | 0. 45442600  | 3. 74708400  |
| O | 1. 33986200  | -1. 30650500 | 2. 38436000  |
| H | 1. 84723200  | -0. 43122800 | 1. 57492400  |
| C | 1. 25772000  | -1. 74328400 | 4. 71401900  |
| H | 0. 57682500  | -2. 57293200 | 4. 51031800  |
| H | 2. 26574000  | -2. 16171300 | 4. 79314200  |
| H | 0. 99410400  | -1. 24582300 | 5. 64652900  |
| C | 8. 72261100  | -2. 93658400 | -3. 09475800 |
| H | 8. 87841200  | -2. 63156900 | -4. 13477500 |
| H | 9. 57796400  | -2. 57569600 | -2. 51684600 |
| H | 8. 72810900  | -4. 02856100 | -3. 06439900 |

### 3(S2)

|   |              |              |              |
|---|--------------|--------------|--------------|
| O | -0. 86398700 | -0. 51681300 | -1. 46259100 |
| N | 0. 56359200  | 2. 55828700  | 1. 86406400  |
| N | -0. 48159400 | 2. 54363700  | 2. 75025100  |
| N | -0. 61802900 | 0. 88562400  | 1. 29906200  |
| C | 2. 25555300  | 3. 49508200  | 3. 28313900  |
| H | 1. 90329400  | 2. 80230400  | 4. 04015400  |
| C | 3. 31678100  | 4. 35419400  | 3. 52662300  |

|   |             |             |             |
|---|-------------|-------------|-------------|
| H | 3.81270800  | 4.34470300  | 4.49077300  |
| C | 3.73795900  | 5.21606400  | 2.51638600  |
| H | 4.57423100  | 5.88618400  | 2.68677800  |
| C | 3.08888800  | 5.22232600  | 1.28833000  |
| H | 3.42454200  | 5.90657200  | 0.51468100  |
| C | 2.00882400  | 4.37527600  | 1.00914100  |
| C | 1.62751500  | 3.51225100  | 2.03934700  |
| C | 0.51581100  | 1.53990300  | 0.99234600  |
| C | -1.18173900 | 1.51687500  | 2.37419100  |
| C | -2.39441400 | 0.80030900  | 2.85932600  |
| H | -3.29517800 | 1.36278500  | 2.60022200  |
| H | -2.37250200 | 0.67835200  | 3.94296100  |
| C | -2.27840000 | -0.55273300 | 2.10666200  |
| H | -3.24613100 | -0.92582800 | 1.76999700  |
| H | -1.86004300 | -1.31182000 | 2.77336900  |
| C | -1.29312000 | -0.36965900 | 0.91189500  |
| H | -0.54027400 | -1.16105800 | 0.90195300  |
| C | -1.88831400 | -0.32098900 | -0.54294700 |
| C | -2.83375500 | -1.52006700 | -0.71319300 |
| C | -4.09783600 | -1.42498200 | -1.28911700 |
| C | -2.36230400 | -2.78388200 | -0.33957800 |
| C | -4.89029500 | -2.56156500 | -1.44642100 |
| H | -4.48541500 | -0.47035500 | -1.62737100 |
| C | -3.16976600 | -3.90485100 | -0.48773600 |
| H | -1.34977800 | -2.90790400 | 0.04404500  |
| C | -4.44415500 | -3.80908600 | -1.03680700 |
| C | -2.57879000 | 1.03146100  | -0.74178400 |
| C | -3.74115700 | 1.36600100  | -0.04755900 |
| C | -1.99885800 | 1.99263300  | -1.57272600 |
| C | -4.29670200 | 2.63782800  | -0.15642400 |
| H | -4.24386200 | 0.63096500  | 0.57567400  |
| C | -2.58069500 | 3.25131400  | -1.69349700 |
| H | -1.08264600 | 1.76320300  | -2.10723700 |
| C | -3.72547700 | 3.59534100  | -0.98145500 |
| H | -5.06886500 | -4.68735100 | -1.15190300 |
| H | -4.16051000 | 4.58432600  | -1.06942700 |
| H | 0.29518800  | -1.88808600 | -1.83691500 |
| C | -2.66213800 | -5.22857300 | 0.01108400  |
| C | -6.23143200 | -2.42375700 | -2.11239400 |
| C | -1.99969700 | 4.24027800  | -2.66547600 |
| C | -5.51094500 | 2.94176900  | 0.67298900  |
| F | -5.21037500 | 2.90760000  | 1.98720500  |
| F | -6.47442400 | 2.03219000  | 0.48059800  |
| F | -6.02041800 | 4.14761000  | 0.41051100  |

|   |             |             |             |
|---|-------------|-------------|-------------|
| F | -0.67700000 | 4.07244400  | -2.81124500 |
| F | -2.20736800 | 5.50450600  | -2.26391000 |
| F | -2.54925300 | 4.11719500  | -3.87948100 |
| F | -1.35604200 | -5.38240700 | -0.23709700 |
| F | -2.81658200 | -5.33468800 | 1.34649400  |
| F | -3.31325900 | -6.25802400 | -0.54142900 |
| F | -6.83301700 | -1.27700400 | -1.76296200 |
| F | -7.05171600 | -3.43123900 | -1.78533100 |
| F | -6.12010200 | -2.41702500 | -3.44728400 |
| C | 1.31769900  | 4.45992900  | -0.34034000 |
| C | 2.29465900  | 4.17915600  | -1.48716600 |
| C | 0.65780000  | 5.83628800  | -0.49842900 |
| H | 0.53128900  | 3.69902200  | -0.39461200 |
| H | 2.75920900  | 3.19759600  | -1.37095600 |
| H | 1.75928800  | 4.19465700  | -2.43883200 |
| H | 3.08113900  | 4.94016700  | -1.52631000 |
| H | -0.07553000 | 6.01919300  | 0.29218200  |
| H | 1.40711500  | 6.63311300  | -0.45341100 |
| H | 0.15266600  | 5.90314200  | -1.46319900 |
| C | 3.94629400  | 0.62225800  | -0.44421100 |
| C | 2.78122800  | 1.08881800  | 0.38450000  |
| H | 4.06970700  | 1.30429900  | -1.30043400 |
| C | 1.50939200  | 1.18451300  | -0.06084900 |
| H | 2.96900500  | 1.29963400  | 1.43363300  |
| C | 5.23283700  | 0.71621000  | 0.38608800  |
| C | 5.54754800  | 2.15929600  | 0.78780300  |
| H | 6.07537100  | 0.31075600  | -0.18378300 |
| H | 5.13969000  | 0.09705300  | 1.29189100  |
| C | 6.80211700  | 2.27094600  | 1.64856800  |
| H | 5.66669100  | 2.75814100  | -0.12512000 |
| H | 4.69756700  | 2.59945000  | 1.32499600  |
| H | 7.00900300  | 3.31014400  | 1.91957200  |
| H | 6.68945700  | 1.69954500  | 2.57566100  |
| H | 7.67800900  | 1.87871300  | 1.12269000  |
| O | 1.04093200  | 0.99596300  | -1.25956300 |
| H | -0.04784200 | 0.16281000  | -1.34976900 |
| C | 1.54032200  | -2.72983900 | 1.56045800  |
| C | 2.87446400  | -1.70044400 | -0.22552900 |
| C | 1.67243500  | -2.24663200 | -0.59141200 |
| N | 0.92967200  | -2.81729200 | 0.41017400  |
| O | 1.21058100  | -2.23334900 | -1.85199800 |
| S | 3.10329300  | -1.97500800 | 1.47159300  |
| C | 3.67058500  | -0.78107800 | -1.10327900 |
| H | 2.97092000  | -0.57596600 | -1.92247400 |

|   |             |             |             |
|---|-------------|-------------|-------------|
| C | 0.91963000  | -3.17219900 | 2.81788300  |
| C | -0.18416600 | -4.03286900 | 2.75629400  |
| C | 1.35871500  | -2.70696300 | 4.06126700  |
| C | -0.84492300 | -4.40618300 | 3.92003300  |
| H | -0.49531200 | -4.41789900 | 1.79172800  |
| C | 0.70204600  | -3.09436200 | 5.22435800  |
| H | 2.20563700  | -2.02804800 | 4.11726500  |
| C | -0.40476200 | -3.93778200 | 5.15724100  |
| H | -1.69886600 | -5.07271500 | 3.85487700  |
| H | 1.05025900  | -2.72890600 | 6.18509700  |
| H | -0.91843000 | -4.23344100 | 6.06628800  |
| C | 4.93052600  | -1.36869100 | -1.70844500 |
| C | 5.63106900  | -2.42575300 | -1.13904600 |
| C | 5.45307700  | -0.78855200 | -2.87252200 |
| C | 6.82261800  | -2.89816300 | -1.69427900 |
| H | 5.24382000  | -2.91015100 | -0.24714200 |
| C | 6.63345600  | -1.23955100 | -3.43617000 |
| H | 4.91499600  | 0.02947200  | -3.34597500 |
| C | 7.32913300  | -2.30071400 | -2.84624700 |
| H | 7.33390000  | -3.72844000 | -1.22208400 |
| H | 7.03672300  | -0.79788300 | -4.34099800 |
| O | 8.47674300  | -2.67861900 | -3.47337100 |
| C | 9.19141500  | -3.75819200 | -2.91725600 |
| H | 9.52860700  | -3.53367000 | -1.89776500 |
| H | 8.58604600  | -4.67283200 | -2.89966600 |
| H | 10.05946900 | -3.91274900 | -3.55782800 |

**TS4(S2)**

|   |             |            |             |
|---|-------------|------------|-------------|
| O | -0.52885700 | 0.04663100 | -0.41472500 |
| N | 0.57547300  | 3.58471500 | 1.58258100  |
| N | -0.59079900 | 3.98681500 | 2.17556100  |
| N | -0.65388100 | 1.86670800 | 1.56898200  |
| C | 2.69907700  | 4.34450700 | 2.43602800  |
| H | 2.57344300  | 3.62136800 | 3.23659400  |
| C | 3.81967700  | 5.15894000 | 2.35430000  |
| H | 4.60384100  | 5.08167900 | 3.09891800  |
| C | 3.92153200  | 6.07491900 | 1.30826500  |
| H | 4.79338400  | 6.71688200 | 1.23489000  |
| C | 2.91616700  | 6.17226100 | 0.35412400  |
| H | 3.01502200  | 6.88897500 | -0.45587000 |
| C | 1.77557800  | 5.36349500 | 0.40388600  |
| C | 1.70656600  | 4.46401400 | 1.46668300  |
| C | 0.55842800  | 2.30308100 | 1.22428300  |
| C | -1.31698000 | 2.90768500 | 2.15679400  |



|   |             |             |             |
|---|-------------|-------------|-------------|
| C | -2.64651600 | 2.46437400  | 2.67464300  |
| H | -3.44882500 | 2.77653700  | 1.99927700  |
| H | -2.84775700 | 2.87637600  | 3.66359500  |
| C | -2.44949900 | 0.92336300  | 2.70027300  |
| H | -3.37232100 | 0.37113500  | 2.52058800  |
| H | -2.06386600 | 0.63566100  | 3.68082300  |
| C | -1.34829000 | 0.58068100  | 1.66918500  |
| H | -0.62646800 | -0.12186800 | 2.06753000  |
| C | -1.75936500 | 0.06142400  | 0.26735100  |
| C | -2.27384700 | -1.37674200 | 0.39831100  |
| C | -3.36858300 | -1.86950000 | -0.30939900 |
| C | -1.52218600 | -2.27137500 | 1.17170400  |
| C | -3.73983500 | -3.20782100 | -0.18835600 |
| H | -3.93052800 | -1.23118000 | -0.98383200 |
| C | -1.92741100 | -3.59181700 | 1.30816300  |
| H | -0.58932800 | -1.96703800 | 1.64419300  |
| C | -3.04536000 | -4.07684800 | 0.64008400  |
| C | -2.71843100 | 1.05352500  | -0.38759200 |
| C | -4.06869300 | 1.12492000  | -0.04090300 |
| C | -2.20174800 | 1.99726800  | -1.28045700 |
| C | -4.88085500 | 2.12459200  | -0.56683100 |
| H | -4.50649400 | 0.39933300  | 0.63829200  |
| C | -3.03225900 | 2.97851800  | -1.81356000 |
| H | -1.15050500 | 1.95268200  | -1.55448500 |
| C | -4.37509000 | 3.05832100  | -1.46130900 |
| H | -3.33567000 | -5.11739700 | 0.72344900  |
| H | -5.01660200 | 3.82433200  | -1.88270800 |
| H | 1.69074600  | 0.99887400  | -2.24884400 |
| C | -1.13276900 | -4.47634200 | 2.22938400  |
| C | -4.91220600 | -3.69498300 | -0.99186900 |
| C | -2.45967400 | 4.01483600  | -2.74073500 |
| C | -6.29551400 | 2.23161800  | -0.07220200 |
| F | -6.32691800 | 2.83736300  | 1.12809500  |
| F | -6.85609700 | 1.02617600  | 0.08503000  |
| F | -7.06608300 | 2.94282300  | -0.90041200 |
| F | -2.03878600 | 5.09361000  | -2.05110600 |
| F | -3.37053200 | 4.44832800  | -3.62004300 |
| F | -1.40874500 | 3.55242600  | -3.42246700 |
| F | 0.18577100  | -4.32823900 | 2.04641500  |
| F | -1.37778000 | -4.16858200 | 3.51629000  |
| F | -1.43098900 | -5.77208200 | 2.07061900  |
| F | -6.07257300 | -3.23091700 | -0.50352600 |
| F | -4.99023100 | -5.03097200 | -1.01109600 |
| F | -4.83445200 | -3.27339500 | -2.26498000 |

|   |             |             |             |
|---|-------------|-------------|-------------|
| C | 0.68908100  | 5.48357400  | -0.64543600 |
| C | 1.24539500  | 5.21196300  | -2.04661900 |
| C | 0.02242900  | 6.86128900  | -0.55695100 |
| H | -0.07715400 | 4.72700000  | -0.44254300 |
| H | 1.71083100  | 4.22431100  | -2.08836000 |
| H | 0.43645400  | 5.24832300  | -2.77976400 |
| H | 1.99093700  | 5.96317900  | -2.32694700 |
| H | -0.40604100 | 7.02586600  | 0.43550400  |
| H | 0.74970300  | 7.65671300  | -0.75008900 |
| H | -0.77364400 | 6.94298600  | -1.29996800 |
| C | 3.76255600  | 0.10696700  | 0.66355300  |
| C | 2.47422100  | 0.72711600  | 1.19715800  |
| H | 4.55174400  | 0.87604700  | 0.67416200  |
| C | 1.68323500  | 1.62603100  | 0.43474300  |
| H | 2.57518500  | 1.12763700  | 2.21183200  |
| C | 4.23086300  | -1.02505800 | 1.59199200  |
| C | 4.50311600  | -0.58641500 | 3.03142500  |
| H | 5.14999600  | -1.45943000 | 1.18116800  |
| H | 3.47482600  | -1.82018800 | 1.61918900  |
| C | 5.03383200  | -1.73944400 | 3.87943900  |
| H | 5.22592700  | 0.24045900  | 3.03129800  |
| H | 3.58748100  | -0.19709100 | 3.49256300  |
| H | 5.20654500  | -1.43418400 | 4.91514700  |
| H | 4.32015300  | -2.57008400 | 3.88475800  |
| H | 5.97790100  | -2.12029300 | 3.47747300  |
| O | 1.70635400  | 1.97807100  | -0.74898400 |
| H | -0.59085300 | -0.49824200 | -1.21944800 |
| C | 0.68404500  | -2.83843100 | -1.54381300 |
| C | 2.47445700  | -1.19434700 | -1.16835200 |
| C | 1.52808600  | -0.88059300 | -2.11417300 |
| N | 0.53353900  | -1.79668200 | -2.31911700 |
| O | 1.45665800  | 0.25550700  | -2.83537800 |
| S | 2.03660200  | -2.72103000 | -0.46527200 |
| C | 3.66696800  | -0.34028500 | -0.82750800 |
| H | 3.49630900  | 0.58056100  | -1.39169900 |
| C | -0.21525400 | -4.00274700 | -1.59196700 |
| C | -1.33413300 | -3.95545600 | -2.43302900 |
| C | 0.03126900  | -5.16079600 | -0.84668100 |
| C | -2.19056800 | -5.04630900 | -2.52011500 |
| H | -1.51158100 | -3.05727100 | -3.01526800 |
| C | -0.83604800 | -6.24487100 | -0.92703800 |
| H | 0.89966800  | -5.21558900 | -0.19677200 |
| C | -1.94938000 | -6.19115700 | -1.76276600 |
| H | -3.05941000 | -4.99649600 | -3.16815400 |

|   |             |             |             |
|---|-------------|-------------|-------------|
| H | -0.63983900 | -7.13180400 | -0.33367700 |
| H | -2.62723000 | -7.03653900 | -1.82539300 |
| C | 5.00716800  | -0.87297800 | -1.32533000 |
| C | 5.30440900  | -2.22916500 | -1.49572600 |
| C | 6.01692600  | 0.04724900  | -1.60182900 |
| C | 6.55880000  | -2.64258400 | -1.91704300 |
| H | 4.54614400  | -2.98119500 | -1.30642800 |
| C | 7.28487800  | -0.34650300 | -2.02590000 |
| H | 5.80964200  | 1.10959300  | -1.49139700 |
| C | 7.55904200  | -1.70470900 | -2.18379500 |
| H | 6.78997600  | -3.69354600 | -2.05269700 |
| H | 8.03451400  | 0.40693200  | -2.23577800 |
| C | 0.99971600  | -0.61489000 | 3.65384800  |
| O | 0.76456500  | 0.58609600  | 3.82365700  |
| O | 1.20920300  | -1.15480000 | 2.48818800  |
| H | 1.67516400  | -0.24162100 | 1.69396700  |
| C | 1.05989800  | -1.58551200 | 4.81565500  |
| H | 0.46516900  | -2.47323900 | 4.58842600  |
| H | 2.09616000  | -1.91245000 | 4.94490800  |
| H | 0.71035300  | -1.10875000 | 5.73058700  |
| O | 8.75467400  | -2.20940900 | -2.59311600 |
| C | 9.78048800  | -1.28911400 | -2.88692800 |
| H | 9.49122000  | -0.61256600 | -3.70059300 |
| H | 10.05008600 | -0.69347200 | -2.00596700 |
| H | 10.64110900 | -1.88036100 | -3.19903000 |

### 3(S3)

|   |             |             |             |
|---|-------------|-------------|-------------|
| O | -0.84544300 | -0.43271200 | -1.49317000 |
| N | 1.05061600  | 2.32408000  | 1.87832800  |
| N | 0.04359200  | 2.39510300  | 2.80478300  |
| N | -0.33746300 | 0.82185200  | 1.30371900  |
| C | 2.89029400  | 3.00240500  | 3.26015800  |
| H | 2.48760600  | 2.32451800  | 4.00542100  |
| C | 4.05201100  | 3.72391400  | 3.49133400  |
| H | 4.57788500  | 3.61877400  | 4.43367300  |
| C | 4.53341000  | 4.57233000  | 2.49669800  |
| H | 5.44711500  | 5.13516200  | 2.65732200  |
| C | 3.84563000  | 4.70252600  | 1.29691900  |
| H | 4.23007800  | 5.37489800  | 0.53566800  |
| C | 2.66534200  | 3.99655700  | 1.03128100  |
| C | 2.22401000  | 3.14186600  | 2.04427900  |
| C | 0.85288500  | 1.35313900  | 0.97429500  |
| C | -0.78454600 | 1.47121500  | 2.42204700  |
| C | -2.05418100 | 0.88105500  | 2.93081200  |

|   |             |             |             |
|---|-------------|-------------|-------------|
| H | -2.89159200 | 1.55400800  | 2.72898800  |
| H | -2.00701000 | 0.71432700  | 4.00766100  |
| C | -2.12515600 | -0.44531300 | 2.12676600  |
| H | -3.14150200 | -0.68980500 | 1.81649300  |
| H | -1.77525400 | -1.27372700 | 2.74884000  |
| C | -1.16875400 | -0.33052300 | 0.90031600  |
| H | -0.51488200 | -1.20286000 | 0.83213500  |
| C | -1.80633700 | -0.15566400 | -0.52660000 |
| C | -2.89131100 | -1.22949700 | -0.70012700 |
| C | -4.15680800 | -0.96570900 | -1.21744800 |
| C | -2.55714300 | -2.55333000 | -0.39229900 |
| C | -5.08235700 | -1.99580700 | -1.38084200 |
| H | -4.44275200 | 0.04015700  | -1.50449000 |
| C | -3.49533300 | -3.56663900 | -0.54556100 |
| H | -1.55222800 | -2.80858400 | -0.05675100 |
| C | -4.76992700 | -3.30209800 | -1.03559000 |
| C | -2.33971800 | 1.27450200  | -0.65007600 |
| C | -3.42805700 | 1.71427900  | 0.10305500  |
| C | -1.68221600 | 2.19363300  | -1.47064600 |
| C | -3.83374300 | 3.04528700  | 0.06156400  |
| H | -3.99027800 | 1.01873500  | 0.72071200  |
| C | -2.11602300 | 3.51519800  | -1.52344200 |
| H | -0.82015500 | 1.88052800  | -2.05075300 |
| C | -3.18501000 | 3.96164100  | -0.75289500 |
| H | -5.49721200 | -4.09690100 | -1.15494800 |
| H | -3.50369500 | 4.99714300  | -0.78840200 |
| H | 0.13408400  | -1.91067600 | -1.96842100 |
| C | -3.12721300 | -4.95917900 | -0.11638100 |
| C | -6.42304600 | -1.67706200 | -1.98279000 |
| C | -1.45909400 | 4.46700700  | -2.48411300 |
| C | -4.97204300 | 3.45534400  | 0.95098500  |
| F | -4.62832800 | 3.33502100  | 2.24945700  |
| F | -6.04199200 | 2.67167700  | 0.76765100  |
| F | -5.34574200 | 4.72140100  | 0.75175300  |
| F | -0.17045600 | 4.15446100  | -2.68677700 |
| F | -1.50483700 | 5.73068600  | -2.03313800 |
| F | -2.06109200 | 4.45276800  | -3.67914400 |
| F | -1.85916300 | -5.25309900 | -0.42809500 |
| F | -3.23874200 | -5.09947000 | 1.22009400  |
| F | -3.91651500 | -5.88324700 | -0.67457100 |
| F | -6.87175000 | -0.48334900 | -1.56731200 |
| F | -7.34226700 | -2.59517900 | -1.65614300 |
| F | -6.36349000 | -1.62978800 | -3.32011900 |
| C | 1.94032400  | 4.21423700  | -0.28509000 |

|   |              |              |              |
|---|--------------|--------------|--------------|
| C | 2. 83618800  | 3. 87018900  | -1. 47988500 |
| C | 1. 43889800  | 5. 66223400  | -0. 36671100 |
| H | 1. 06967300  | 3. 55102300  | -0. 33477500 |
| H | 3. 18703700  | 2. 83776000  | -1. 41814700 |
| H | 2. 27260400  | 3. 98610900  | -2. 40803400 |
| H | 3. 70410700  | 4. 53656300  | -1. 52285400 |
| H | 0. 76125100  | 5. 89576700  | 0. 45942800  |
| H | 2. 27656200  | 6. 36572300  | -0. 32407500 |
| H | 0. 90979800  | 5. 82518800  | -1. 30687700 |
| C | 4. 10079200  | 0. 11186000  | -0. 63272400 |
| C | 3. 02832000  | 0. 67159500  | 0. 26043700  |
| H | 4. 27010700  | 0. 81096900  | -1. 46711000 |
| C | 1. 76057500  | 0. 92797100  | -0. 12984700 |
| H | 3. 27772500  | 0. 81739800  | 1. 30761600  |
| C | 5. 41934500  | 0. 02445100  | 0. 14682700  |
| C | 5. 91125100  | 1. 40434400  | 0. 59072500  |
| H | 6. 19017700  | -0. 44698700 | -0. 47184900 |
| H | 5. 28981700  | -0. 61897000 | 1. 03089600  |
| C | 7. 20337800  | 1. 33650200  | 1. 39887200  |
| H | 6. 06142800  | 2. 02577500  | -0. 30235000 |
| H | 5. 13858700  | 1. 91256200  | 1. 18169700  |
| H | 7. 53717900  | 2. 33299900  | 1. 70151900  |
| H | 7. 06331200  | 0. 74061900  | 2. 30656900  |
| H | 8. 00783800  | 0. 87278700  | 0. 81975800  |
| O | 1. 23192000  | 0. 84019000  | -1. 31453300 |
| H | 0. 04617400  | 0. 14282900  | -1. 38988300 |
| C | 1. 39727000  | -3. 02279200 | 1. 34068900  |
| C | 2. 77801300  | -2. 08311000 | -0. 45882800 |
| C | 1. 50760300  | -2. 47014800 | -0. 79539300 |
| N | 0. 73946000  | -2. 99138900 | 0. 21380400  |
| O | 1. 00582000  | -2. 35018800 | -2. 03451500 |
| S | 3. 03376000  | -2. 45077800 | 1. 21686500  |
| C | 3. 64038700  | -1. 22192000 | -1. 33278500 |
| H | 2. 93985100  | -0. 90453600 | -2. 11442500 |
| C | 0. 77573800  | -3. 44269200 | 2. 60537100  |
| C | -0. 42071100 | -4. 16995800 | 2. 55733100  |
| C | 1. 31020300  | -3. 08069900 | 3. 84574200  |
| C | -1. 07700100 | -4. 51333400 | 3. 73278100  |
| H | -0. 80859900 | -4. 47810500 | 1. 59294300  |
| C | 0. 65630800  | -3. 43845100 | 5. 01978900  |
| H | 2. 23074800  | -2. 50465700 | 3. 89182700  |
| C | -0. 54134000 | -4. 14821800 | 4. 96709600  |
| H | -2. 00322200 | -5. 07619700 | 3. 67860300  |
| H | 1. 07877000  | -3. 15422000 | 5. 97817400  |

|   |             |             |             |
|---|-------------|-------------|-------------|
| H | -1.05196000 | -4.42088400 | 5.88499200  |
| C | 4.80489100  | -1.91836600 | -2.01051500 |
| C | 5.40956300  | -3.06429900 | -1.49249800 |
| C | 5.33715000  | -1.35367500 | -3.17412700 |
| C | 6.52579200  | -3.62887300 | -2.10499300 |
| H | 5.00198700  | -3.53323300 | -0.60190200 |
| C | 6.45194500  | -1.89953700 | -3.79949900 |
| H | 4.86647700  | -0.47078800 | -3.59952900 |
| C | 7.03239000  | -3.03110400 | -3.24666200 |
| H | 7.00218000  | -4.52027600 | -1.71307100 |
| H | 6.86958900  | -1.47168900 | -4.70374100 |
| F | 8.11344300  | -3.56480900 | -3.83942300 |

**TS4(S3)**

|   |             |             |             |
|---|-------------|-------------|-------------|
| O | -0.40576400 | 0.08753400  | -0.43825700 |
| N | 1.18185000  | 3.45293100  | 1.52330400  |
| N | 0.09642400  | 3.97620100  | 2.17225400  |
| N | -0.22926900 | 1.88108500  | 1.56334400  |
| C | 3.41702200  | 3.96637700  | 2.26998800  |
| H | 3.25322000  | 3.25424800  | 3.07352100  |
| C | 4.61522900  | 4.65304000  | 2.13366900  |
| H | 5.42285400  | 4.48276900  | 2.83656900  |
| C | 4.76449200  | 5.56208900  | 1.08726600  |
| H | 5.69717800  | 6.10453100  | 0.97130200  |
| C | 3.72869000  | 5.77901300  | 0.18688600  |
| H | 3.86481800  | 6.48828900  | -0.62422700 |
| C | 2.50956300  | 5.10078300  | 0.29247600  |
| C | 2.39580800  | 4.20382600  | 1.35360900  |
| C | 1.00612700  | 2.18398200  | 1.16262500  |
| C | -0.74486300 | 2.98397900  | 2.18514900  |
| C | -2.08897900 | 2.68520900  | 2.76522500  |
| H | -2.88331300 | 3.09005600  | 2.13093200  |
| H | -2.19572300 | 3.10781000  | 3.76436500  |
| C | -2.06233700 | 1.13163700  | 2.77561600  |
| H | -3.04812400 | 0.68593200  | 2.64011000  |
| H | -1.66274000 | 0.79439700  | 3.73457200  |
| C | -1.05761900 | 0.67948800  | 1.68968100  |
| H | -0.40081600 | -0.10362000 | 2.04803200  |
| C | -1.59193600 | 0.22643000  | 0.30650600  |
| C | -2.25336900 | -1.14917400 | 0.45088000  |
| C | -3.42306000 | -1.51188200 | -0.21429900 |
| C | -1.57265500 | -2.12971800 | 1.18488200  |
| C | -3.93225300 | -2.80367700 | -0.08897200 |
| H | -3.93998500 | -0.80780600 | -0.85868900 |

|   |              |              |              |
|---|--------------|--------------|--------------|
| C | -2. 11275100 | -3. 40031500 | 1. 32694600  |
| H | -0. 59396600 | -1. 93478700 | 1. 62075700  |
| C | -3. 30282000 | -3. 75333100 | 0. 70191700  |
| C | -2. 46958800 | 1. 32409900  | -0. 29168800 |
| C | -3. 78617000 | 1. 53381800  | 0. 12222700  |
| C | -1. 89969900 | 2. 21873800  | -1. 20234600 |
| C | -4. 51153600 | 2. 62086600  | -0. 35466600 |
| H | -4. 26564500 | 0. 84969700  | 0. 81617700  |
| C | -2. 64584700 | 3. 28938400  | -1. 68619200 |
| H | -0. 87429300 | 2. 06577600  | -1. 52988600 |
| C | -3. 95335300 | 3. 50710200  | -1. 26627900 |
| H | -3. 70055500 | -4. 75745200 | 0. 78864300  |
| H | -4. 52931100 | 4. 34234200  | -1. 64902100 |
| H | 1. 82262100  | 0. 80488400  | -2. 36689000 |
| C | -1. 38099900 | -4. 37766700 | 2. 20552500  |
| C | -5. 18303500 | -3. 15003200 | -0. 84615500 |
| C | -2. 01121000 | 4. 26958400  | -2. 63388600 |
| C | -5. 88075100 | 2. 87148200  | 0. 21114700  |
| F | -5. 78783300 | 3. 45967200  | 1. 41693900  |
| F | -6. 55937000 | 1. 73084100  | 0. 38523300  |
| F | -6. 60949400 | 3. 67305500  | -0. 57095400 |
| F | -1. 43086300 | 5. 28104500  | -1. 95838400 |
| F | -2. 91398100 | 4. 81885800  | -3. 45460300 |
| F | -1. 06017200 | 3. 70165800  | -3. 37980900 |
| F | -0. 06265800 | -4. 36917600 | 1. 96816900  |
| F | -1. 53805600 | -4. 06400200 | 3. 50447800  |
| F | -1. 82301900 | -5. 63162600 | 2. 04655800  |
| F | -6. 26278100 | -2. 56079500 | -0. 31043500 |
| F | -5. 41234800 | -4. 46843600 | -0. 86523900 |
| F | -5. 10816100 | -2. 73126700 | -2. 12042400 |
| C | 1. 39104700  | 5. 35048100  | -0. 69871800 |
| C | 1. 84079700  | 5. 03043600  | -2. 12766800 |
| C | 0. 88845500  | 6. 79331500  | -0. 57212600 |
| H | 0. 55613600  | 4. 68281800  | -0. 45819100 |
| H | 2. 19195900  | 3. 99803600  | -2. 19602800 |
| H | 1. 00389100  | 5. 16154300  | -2. 81736200 |
| H | 2. 64914000  | 5. 69722100  | -2. 44494900 |
| H | 0. 53228300  | 6. 99643100  | 0. 44153500  |
| H | 1. 68946400  | 7. 50404800  | -0. 80042900 |
| H | 0. 06974800  | 6. 97000400  | -1. 27278400 |
| C | 3. 91148700  | -0. 35419300 | 0. 44387800  |
| C | 2. 72608100  | 0. 39914600  | 1. 04083500  |
| H | 4. 78135600  | 0. 32149500  | 0. 43369800  |
| C | 2. 01108500  | 1. 39253000  | 0. 32065300  |

|   |             |             |             |
|---|-------------|-------------|-------------|
| H | 2.91850200  | 0.77404800  | 2.05212600  |
| C | 4.28654000  | -1.54942200 | 1.33470000  |
| C | 4.67959800  | -1.16949100 | 2.76275800  |
| H | 5.12556300  | -2.08387700 | 0.87273900  |
| H | 3.44313900  | -2.24878500 | 1.39243900  |
| C | 5.10670000  | -2.39130600 | 3.57203000  |
| H | 5.49644400  | -0.43596400 | 2.73492600  |
| H | 3.84080900  | -0.68005000 | 3.27212300  |
| H | 5.36571500  | -2.12489800 | 4.60038300  |
| H | 4.29838400  | -3.12939400 | 3.60569200  |
| H | 5.97686300  | -2.87710100 | 3.11962300  |
| O | 2.02638600  | 1.75349300  | -0.86034500 |
| H | -0.56781200 | -0.43749400 | -1.24208600 |
| C | 0.43046300  | -2.90581600 | -1.63720600 |
| C | 2.40590900  | -1.47272900 | -1.33700000 |
| C | 1.45732700  | -1.04583800 | -2.23452900 |
| N | 0.35939900  | -1.84526200 | -2.39781800 |
| O | 1.47833700  | 0.09847800  | -2.94471500 |
| S | 1.83639800  | -2.95057300 | -0.62225000 |
| C | 3.70071900  | -0.76258600 | -1.04641600 |
| H | 3.61203000  | 0.17990400  | -1.59411200 |
| C | -0.59135500 | -3.96530700 | -1.65160400 |
| C | -1.73226600 | -3.78992300 | -2.44470000 |
| C | -0.44017500 | -5.14997500 | -0.92303600 |
| C | -2.70405500 | -4.78164600 | -2.50103400 |
| H | -1.83585600 | -2.87252000 | -3.01466800 |
| C | -1.42156200 | -6.13396900 | -0.97242400 |
| H | 0.44279100  | -5.30340300 | -0.30955500 |
| C | -2.55609400 | -5.95297500 | -1.76044700 |
| H | -3.58825300 | -4.63293900 | -3.11195600 |
| H | -1.29796900 | -7.04231800 | -0.39208900 |
| H | -3.32274900 | -6.72031800 | -1.79898700 |
| C | 4.95002300  | -1.43764200 | -1.60912400 |
| C | 5.01852500  | -2.78364900 | -1.96961700 |
| C | 6.09987000  | -0.65431400 | -1.76743400 |
| C | 6.19795700  | -3.34123000 | -2.45929300 |
| H | 4.14184100  | -3.41534500 | -1.88425000 |
| C | 7.28597700  | -1.18977200 | -2.25332100 |
| H | 6.06240300  | 0.40279100  | -1.51560800 |
| C | 7.31444600  | -2.53471200 | -2.58978700 |
| H | 6.25807400  | -4.38552800 | -2.74378800 |
| H | 8.17719900  | -0.58691600 | -2.38504800 |
| C | 1.22842100  | -0.79655600 | 3.55653100  |
| O | 1.13753400  | 0.42145100  | 3.74244500  |



|   |             |              |              |
|---|-------------|--------------|--------------|
| O | 1. 32152500 | -1. 34485200 | 2. 37956500  |
| H | 1. 84835300 | -0. 47930400 | 1. 56826200  |
| C | 1. 23324600 | -1. 77918000 | 4. 70969100  |
| H | 0. 53057800 | -2. 59095300 | 4. 50789200  |
| H | 2. 23019200 | -2. 22371000 | 4. 78671700  |
| H | 0. 98482300 | -1. 27484100 | 5. 64266200  |
| F | 8. 45382400 | -3. 06393200 | -3. 06445100 |

**3(S4)**

|   |              |              |              |
|---|--------------|--------------|--------------|
| O | -0. 86140300 | -0. 50721600 | -1. 45451500 |
| N | 0. 61202200  | 2. 53142300  | 1. 88744800  |
| N | -0. 44239400 | 2. 54304000  | 2. 76230700  |
| N | -0. 60462400 | 0. 88809400  | 1. 31023200  |
| C | 2. 31336100  | 3. 42258300  | 3. 32457900  |
| H | 1. 93581500  | 2. 73839200  | 4. 07721400  |
| C | 3. 39435500  | 4. 25327000  | 3. 57949700  |
| H | 3. 88050600  | 4. 22967100  | 4. 54835800  |
| C | 3. 84763000  | 5. 10514500  | 2. 57463200  |
| H | 4. 69947600  | 5. 75288700  | 2. 75411900  |
| C | 3. 21055600  | 5. 13040500  | 1. 34053800  |
| H | 3. 57113200  | 5. 80707400  | 0. 57145200  |
| C | 2. 11134800  | 4. 31235300  | 1. 04978300  |
| C | 1. 69803900  | 3. 45805800  | 2. 07482800  |
| C | 0. 54795800  | 1. 51447000  | 1. 01534700  |
| C | -1. 16380000 | 1. 53369400  | 2. 37930900  |
| C | -2. 39857300 | 0. 84769100  | 2. 85241200  |
| H | -3. 28257500 | 1. 43191600  | 2. 58393200  |
| H | -2. 39066300 | 0. 72613900  | 3. 93628200  |
| C | -2. 30817200 | -0. 50836500 | 2. 10171700  |
| H | -3. 28131000 | -0. 85822400 | 1. 75592200  |
| H | -1. 91484300 | -1. 27664400 | 2. 77300400  |
| C | -1. 30734300 | -0. 35013000 | 0. 91630700  |
| H | -0. 57433100 | -1. 16001700 | 0. 91302300  |
| C | -1. 88886800 | -0. 28629200 | -0. 54333200 |
| C | -2. 86222000 | -1. 46121300 | -0. 72374800 |
| C | -4. 11518700 | -1. 33395800 | -1. 31769400 |
| C | -2. 42917600 | -2. 73637100 | -0. 34278100 |
| C | -4. 93437100 | -2. 44971600 | -1. 48576700 |
| H | -4. 47309800 | -0. 36987800 | -1. 66183500 |
| C | -3. 26284500 | -3. 83645600 | -0. 50263900 |
| H | -1. 42614500 | -2. 88668400 | 0. 05580400  |
| C | -4. 52628100 | -3. 70820000 | -1. 06979600 |
| C | -2. 54341800 | 1. 08299200  | -0. 74739500 |
| C | -3. 70474500 | 1. 44466300  | -0. 06517500 |

|   |             |             |             |
|---|-------------|-------------|-------------|
| C | -1.93117800 | 2.03088200  | -1.57031500 |
| C | -4.22748000 | 2.73000100  | -0.17734900 |
| H | -4.23222600 | 0.72099500  | 0.55085000  |
| C | -2.48062000 | 3.30366700  | -1.69500600 |
| H | -1.01553100 | 1.77987600  | -2.09603900 |
| C | -3.62408000 | 3.67454500  | -0.99441700 |
| H | -5.17168400 | -4.57014000 | -1.19363800 |
| H | -4.03377100 | 4.67405900  | -1.08513000 |
| H | 0.26282700  | -1.90799400 | -1.82067600 |
| C | -2.79466600 | -5.17252700 | 0.00203300  |
| C | -6.26225800 | -2.27742100 | -2.17031100 |
| C | -1.86538900 | 4.27948200  | -2.65925000 |
| C | -5.44237700 | 3.06247900  | 0.64028200  |
| F | -5.15541200 | 3.01944400  | 1.95728300  |
| F | -6.42541000 | 2.17665100  | 0.43705900  |
| F | -5.91953000 | 4.28056300  | 0.37433900  |
| F | -0.54567200 | 4.07888600  | -2.79163200 |
| F | -2.04554500 | 5.54769500  | -2.25744600 |
| F | -2.40514900 | 4.17171900  | -3.87892100 |
| F | -1.49236800 | -5.36322400 | -0.24161600 |
| F | -2.95572400 | -5.26958000 | 1.33723700  |
| F | -3.47246200 | -6.18486200 | -0.54934500 |
| F | -6.83998000 | -1.11691100 | -1.82621800 |
| F | -7.11138400 | -3.26508700 | -1.85730200 |
| F | -6.13153400 | -2.27028000 | -3.50332200 |
| C | 1.43486800  | 4.41715400  | -0.30565100 |
| C | 2.41467000  | 4.11405700  | -1.44432900 |
| C | 0.81136900  | 5.81002900  | -0.46676800 |
| H | 0.62987800  | 3.67662000  | -0.36838000 |
| H | 2.85327800  | 3.12085300  | -1.32590600 |
| H | 1.88853900  | 4.14508400  | -2.40075800 |
| H | 3.22048000  | 4.85493100  | -1.47472800 |
| H | 0.07624400  | 6.01004600  | 0.31797000  |
| H | 1.58019200  | 6.58752100  | -0.41388100 |
| H | 0.31624100  | 5.89123200  | -1.43562100 |
| C | 3.96718500  | 0.51582600  | -0.39311300 |
| C | 2.80936500  | 1.01021900  | 0.42924500  |
| H | 4.11531200  | 1.19711300  | -1.24606600 |
| C | 1.54390500  | 1.13455200  | -0.02751700 |
| H | 2.99561300  | 1.21783600  | 1.47906900  |
| C | 5.25049500  | 0.56946000  | 0.44589400  |
| C | 5.60434800  | 2.00163200  | 0.85434900  |
| H | 6.08640300  | 0.14317600  | -0.11890200 |
| H | 5.13377700  | -0.04959100 | 1.34884600  |

|    |             |             |             |
|----|-------------|-------------|-------------|
| C  | 6.85765700  | 2.07338900  | 1.72117200  |
| H  | 5.74494700  | 2.59992200  | -0.05586300 |
| H  | 4.76466800  | 2.46390100  | 1.38900600  |
| H  | 7.09296100  | 3.10512500  | 1.99704400  |
| H  | 6.72431000  | 1.50202300  | 2.64546800  |
| H  | 7.72440200  | 1.65825800  | 1.19778900  |
| O  | 1.08428000  | 0.95377200  | -1.23012900 |
| H  | -0.03141800 | 0.14970700  | -1.33282800 |
| C  | 1.46524800  | -2.78927800 | 1.58274700  |
| C  | 2.83405900  | -1.78178400 | -0.18852300 |
| C  | 1.62271400  | -2.29881300 | -0.56549200 |
| N  | 0.86027900  | -2.85705400 | 0.42824700  |
| O  | 1.17221400  | -2.26949100 | -1.82938100 |
| S  | 3.04488600  | -2.06743000 | 1.50916200  |
| C  | 3.65347300  | -0.87638900 | -1.05882000 |
| H  | 2.96211300  | -0.64896300 | -1.87914500 |
| C  | 0.83010700  | -3.22837900 | 2.83407500  |
| C  | -0.29047000 | -4.06595800 | 2.76087000  |
| C  | 1.27470000  | -2.78312500 | 4.08277200  |
| C  | -0.96226900 | -4.43631800 | 3.91919800  |
| H  | -0.60604400 | -4.43615100 | 1.79195500  |
| C  | 0.60670700  | -3.16768500 | 5.24023200  |
| H  | 2.13528000  | -2.12243200 | 4.14785500  |
| C  | -0.51657300 | -3.98806100 | 5.16181800  |
| H  | -1.82917000 | -5.08492700 | 3.84564700  |
| H  | 0.95931700  | -2.81851800 | 6.20536100  |
| H  | -1.03895200 | -4.28167200 | 6.06653200  |
| C  | 4.90000200  | -1.49071400 | -1.66501800 |
| C  | 5.57178400  | -2.56887600 | -1.08909900 |
| C  | 5.43246900  | -0.92077600 | -2.82531500 |
| C  | 6.74994400  | -3.06224600 | -1.64374100 |
| H  | 5.16910300  | -3.04308700 | -0.19907900 |
| C  | 6.60790800  | -1.39778300 | -3.39247600 |
| H  | 4.91309300  | -0.09059600 | -3.29761200 |
| C  | 7.26076400  | -2.46779200 | -2.78998400 |
| H  | 7.26675400  | -3.90268700 | -1.19409500 |
| H  | 7.01287700  | -0.95494700 | -4.29549200 |
| Cl | 8.73671200  | -3.08064400 | -3.49334000 |

**TS4(S4)**

|   |             |            |             |
|---|-------------|------------|-------------|
| O | -0.52979100 | 0.03563300 | -0.41931900 |
| N | 0.35062800  | 3.65107900 | 1.54015700  |
| N | -0.83694500 | 3.97982500 | 2.13556200  |
| N | -0.75882400 | 1.85310700 | 1.55494100  |

|   |              |              |              |
|---|--------------|--------------|--------------|
| C | 2. 42600900  | 4. 56218200  | 2. 36467400  |
| H | 2. 35774200  | 3. 84094400  | 3. 17385800  |
| C | 3. 48788700  | 5. 44984500  | 2. 26337200  |
| H | 4. 28276800  | 5. 43359600  | 3. 00040600  |
| C | 3. 51686900  | 6. 36009300  | 1. 20780000  |
| H | 4. 34239500  | 7. 05881000  | 1. 11901400  |
| C | 2. 49742000  | 6. 37979500  | 0. 26388300  |
| H | 2. 53915300  | 7. 09363300  | -0. 55355000 |
| C | 1. 41473900  | 5. 49639200  | 0. 33350000  |
| C | 1. 41802400  | 4. 60441400  | 1. 40486100  |
| C | 0. 41870200  | 2. 36689400  | 1. 19743300  |
| C | -1. 48820100 | 2. 85360100  | 2. 13446200  |
| C | -2. 78108600 | 2. 32667400  | 2. 66663000  |
| H | -3. 60732300 | 2. 57637200  | 1. 99420200  |
| H | -3. 00301700 | 2. 73478800  | 3. 65276400  |
| C | -2. 47947900 | 0. 80290100  | 2. 70706400  |
| H | -3. 36385700 | 0. 18721400  | 2. 54098500  |
| H | -2. 06722800 | 0. 55310800  | 3. 68718900  |
| C | -1. 36546400 | 0. 52471600  | 1. 67038200  |
| H | -0. 59592900 | -0. 12498700 | 2. 06883900  |
| C | -1. 75213700 | -0. 03109600 | 0. 27560500  |
| C | -2. 16443600 | -1. 50087300 | 0. 41836100  |
| C | -3. 22069000 | -2. 07321600 | -0. 28803600 |
| C | -1. 35373000 | -2. 33656800 | 1. 19806300  |
| C | -3. 49764200 | -3. 43360700 | -0. 16020700 |
| H | -3. 82548700 | -1. 47934100 | -0. 96606400 |
| C | -1. 66547100 | -3. 68146400 | 1. 34082100  |
| H | -0. 44539800 | -1. 96598900 | 1. 67069800  |
| C | -2. 74517800 | -4. 24747800 | 0. 67343400  |
| C | -2. 78491600 | 0. 88606300  | -0. 37647700 |
| C | -4. 13410200 | 0. 86166800  | -0. 01893200 |
| C | -2. 34540400 | 1. 85843300  | -1. 27963000 |
| C | -5. 02047900 | 1. 79681400  | -0. 54340900 |
| H | -4. 51306000 | 0. 11011300  | 0. 66739700  |
| C | -3. 24901200 | 2. 77360500  | -1. 81169700 |
| H | -1. 29632200 | 1. 88748300  | -1. 56364200 |
| C | -4. 59089400 | 2. 75887100  | -1. 44782100 |
| H | -2. 96186600 | -5. 30539000 | 0. 76204000  |
| H | -5. 28957100 | 3. 47385200  | -1. 86794000 |
| H | 1. 61951000  | 1. 11509200  | -2. 26796100 |
| C | -0. 81105200 | -4. 50349900 | 2. 26650000  |
| C | -4. 63256200 | -4. 00516500 | -0. 96216300 |
| C | -2. 75951300 | 3. 84119100  | -2. 75103200 |
| C | -6. 43505700 | 1. 80507900  | -0. 03673100 |

|   |             |             |             |
|---|-------------|-------------|-------------|
| F | -6.49892700 | 2.41343500  | 1.16089100  |
| F | -6.90655900 | 0.56357300  | 0.13111100  |
| F | -7.26116700 | 2.45518200  | -0.86139900 |
| F | -2.39795400 | 4.94735400  | -2.07147200 |
| F | -3.70988800 | 4.21116900  | -3.61705500 |
| F | -1.69154300 | 3.44432200  | -3.44779200 |
| F | 0.49396200  | -4.26239400 | 2.08365000  |
| F | -1.07818300 | -4.20942300 | 3.55191200  |
| F | -1.01565400 | -5.81772600 | 2.11183700  |
| F | -5.82215300 | -3.61121300 | -0.48301500 |
| F | -4.62365900 | -5.34343800 | -0.96596900 |
| F | -4.57653100 | -3.59391700 | -2.23984900 |
| C | 0.31203800  | 5.53250300  | -0.70507700 |
| C | 0.87069000  | 5.28073200  | -2.10906200 |
| C | -0.44250700 | 6.86466900  | -0.62542000 |
| H | -0.40115400 | 4.73028100  | -0.48486100 |
| H | 1.40076900  | 4.32592700  | -2.14438800 |
| H | 0.05356700  | 5.25409000  | -2.83352900 |
| H | 1.56167900  | 6.07614400  | -2.40658500 |
| H | -0.87081200 | 7.01325400  | 0.36961200  |
| H | 0.22892000  | 7.70355100  | -0.83591100 |
| H | -1.24972300 | 6.88495000  | -1.36054700 |
| C | 3.75602200  | 0.37775000  | 0.64891300  |
| C | 2.43041700  | 0.91374300  | 1.18199800  |
| H | 4.49092700  | 1.19801000  | 0.66144200  |
| C | 1.58408300  | 1.75675500  | 0.41358600  |
| H | 2.50912700  | 1.32848600  | 2.19295200  |
| C | 4.29874300  | -0.72112600 | 1.57687700  |
| C | 4.55440600  | -0.26072500 | 3.01244900  |
| H | 5.23950900  | -1.10207600 | 1.16094300  |
| H | 3.59194400  | -1.55949700 | 1.61275400  |
| C | 5.15717600  | -1.37698100 | 3.86144600  |
| H | 5.22747400  | 0.60702000  | 3.00429200  |
| H | 3.62010300  | 0.07601800  | 3.47739700  |
| H | 5.31882000  | -1.05680500 | 4.89433500  |
| H | 4.49320000  | -2.24771800 | 3.87572800  |
| H | 6.11926900  | -1.70365700 | 3.45466800  |
| O | 1.58976800  | 2.10110700  | -0.77232300 |
| H | -0.56247000 | -0.51839200 | -1.21928500 |
| C | 0.87498800  | -2.77515900 | -1.52518800 |
| C | 2.55020200  | -1.01102300 | -1.17039500 |
| C | 1.58222500  | -0.76948700 | -2.11489900 |
| N | 0.65145400  | -1.75306400 | -2.30848000 |
| O | 1.43276500  | 0.35177600  | -2.84580000 |

|    |              |              |              |
|----|--------------|--------------|--------------|
| S  | 2. 21969400  | -2. 55784600 | -0. 45094100 |
| C  | 3. 68545700  | -0. 07987900 | -0. 84061800 |
| H  | 3. 45887300  | 0. 82546800  | -1. 41106500 |
| C  | 0. 05893500  | -3. 99971500 | -1. 56217500 |
| C  | -1. 05866700 | -4. 03898000 | -2. 40526600 |
| C  | 0. 38579200  | -5. 13043500 | -0. 80606300 |
| C  | -1. 83540100 | -5. 18859400 | -2. 48359600 |
| H  | -1. 29823400 | -3. 16101200 | -2. 99602800 |
| C  | -0. 40201500 | -6. 27408400 | -0. 87807100 |
| H  | 1. 25392800  | -5. 11744700 | -0. 15359800 |
| C  | -1. 51460900 | -6. 30668100 | -1. 71591500 |
| H  | -2. 70399600 | -5. 20653800 | -3. 13346500 |
| H  | -0. 14483000 | -7. 13956100 | -0. 27645600 |
| H  | -2. 13024500 | -7. 19879800 | -1. 77220300 |
| C  | 5. 05759200  | -0. 53208400 | -1. 33495500 |
| C  | 5. 37023500  | -1. 84522000 | -1. 68425600 |
| C  | 6. 06635900  | 0. 43284600  | -1. 43996100 |
| C  | 6. 65081100  | -2. 19468800 | -2. 10776800 |
| H  | 4. 61026700  | -2. 61690400 | -1. 64124800 |
| C  | 7. 34858700  | 0. 10445400  | -1. 86024400 |
| H  | 5. 84146000  | 1. 46873700  | -1. 19804300 |
| C  | 7. 63178600  | -1. 21705000 | -2. 18805800 |
| H  | 6. 88438700  | -3. 21853000 | -2. 37727100 |
| H  | 8. 12124600  | 0. 86065700  | -1. 94334400 |
| C  | 1. 06209100  | -0. 50268500 | 3. 65562500  |
| O  | 0. 74925200  | 0. 68188600  | 3. 81495200  |
| O  | 1. 30180300  | -1. 03854600 | 2. 49375900  |
| H  | 1. 70122800  | -0. 10067700 | 1. 68838000  |
| C  | 1. 19046900  | -1. 45600500 | 4. 82608900  |
| H  | 0. 65193300  | -2. 38181900 | 4. 61092800  |
| H  | 2. 24600000  | -1. 71565300 | 4. 95210100  |
| H  | 0. 81642300  | -0. 99347000 | 5. 73858200  |
| Cl | 9. 23871900  | -1. 64684100 | -2. 71733800 |

### 3(S5)

|   |              |              |              |
|---|--------------|--------------|--------------|
| O | -0. 89531000 | -0. 53807400 | -1. 43272300 |
| N | 0. 33886100  | 2. 61465700  | 1. 90165300  |
| N | -0. 74127100 | 2. 59093600  | 2. 74391800  |
| N | -0. 78298800 | 0. 90799000  | 1. 31579000  |
| C | 1. 95482000  | 3. 60197200  | 3. 37416200  |
| H | 1. 58620000  | 2. 91194000  | 4. 12590800  |
| C | 2. 98949700  | 4. 48413600  | 3. 64767400  |
| H | 3. 44729300  | 4. 49597600  | 4. 63045100  |
| C | 3. 43343700  | 5. 34201500  | 2. 64367400  |

|   |             |             |             |
|---|-------------|-------------|-------------|
| H | 4.24954600  | 6.03019100  | 2.83806400  |
| C | 2.83231600  | 5.32194700  | 1.39157200  |
| H | 3.18430200  | 6.00421800  | 0.62345700  |
| C | 1.77989800  | 4.45110300  | 1.08151800  |
| C | 1.37567400  | 3.59278500  | 2.10674000  |
| C | 0.34786200  | 1.58285600  | 1.04510200  |
| C | -1.40371800 | 1.54345300  | 2.35671100  |
| C | -2.61926300 | 0.80820100  | 2.80477100  |
| H | -3.52087600 | 1.34617300  | 2.50059600  |
| H | -2.63845000 | 0.70413800  | 3.89031500  |
| C | -2.44362600 | -0.55371900 | 2.08029900  |
| H | -3.38861200 | -0.95443000 | 1.71242500  |
| H | -2.03514800 | -1.29186300 | 2.77581900  |
| C | -1.41652800 | -0.36721800 | 0.92178700  |
| H | -0.64735800 | -1.14222400 | 0.95254700  |
| C | -1.95826000 | -0.35172000 | -0.55422200 |
| C | -2.87079400 | -1.57280000 | -0.74463800 |
| C | -4.10661600 | -1.51196100 | -1.38349900 |
| C | -2.39500900 | -2.82065600 | -0.32662700 |
| C | -4.86860200 | -2.66615100 | -1.56002400 |
| H | -4.49494800 | -0.57064500 | -1.75656300 |
| C | -3.17217800 | -3.96001900 | -0.49631400 |
| H | -1.40126000 | -2.91954000 | 0.10923800  |
| C | -4.41929700 | -3.89819300 | -1.10864100 |
| C | -2.66856300 | 0.98262500  | -0.79836700 |
| C | -3.86601900 | 1.29821300  | -0.15700300 |
| C | -2.07576200 | 1.94725300  | -1.61602100 |
| C | -4.44377300 | 2.55626100  | -0.30309800 |
| H | -4.37838300 | 0.55853900  | 0.45275500  |
| C | -2.67952600 | 3.19120400  | -1.77568400 |
| H | -1.13402400 | 1.73256900  | -2.11090000 |
| C | -3.85983300 | 3.51730300  | -1.11506900 |
| H | -5.02072200 | -4.79033300 | -1.23958200 |
| H | -4.31236100 | 4.49535600  | -1.23237900 |
| H | 0.29974800  | -1.89130000 | -1.74359900 |
| C | -2.66036800 | -5.26515000 | 0.04569800  |
| C | -6.17835700 | -2.56454600 | -2.29233200 |
| C | -2.08121800 | 4.18212100  | -2.73528500 |
| C | -5.69697400 | 2.84240200  | 0.47344100  |
| F | -5.44751400 | 2.83010800  | 1.79872900  |
| F | -6.63107900 | 1.90887600  | 0.25438400  |
| F | -6.22155300 | 4.03316500  | 0.17580900  |
| F | -0.75029400 | 4.04037400  | -2.82659400 |
| F | -2.33042400 | 5.44547300  | -2.35620000 |

|   |             |             |             |
|---|-------------|-------------|-------------|
| F | -2.57931500 | 4.03429100  | -3.96819700 |
| F | -1.34533000 | -5.40364000 | -0.16384000 |
| F | -2.84868400 | -5.34333800 | 1.37848100  |
| F | -3.28060000 | -6.31581700 | -0.50096900 |
| F | -6.82125000 | -1.42888100 | -1.98279600 |
| F | -6.99041200 | -3.58776800 | -1.99631500 |
| F | -6.00089900 | -2.56554100 | -3.61979800 |
| C | 1.13895200  | 4.50714900  | -0.29389000 |
| C | 2.16390800  | 4.23376800  | -1.39986900 |
| C | 0.45842500  | 5.86802800  | -0.49311200 |
| H | 0.36996700  | 3.73030800  | -0.36825800 |
| H | 2.64295400  | 3.26300600  | -1.25479300 |
| H | 1.66502900  | 4.22871300  | -2.37125500 |
| H | 2.93636700  | 5.00967900  | -1.41796800 |
| H | -0.30717900 | 6.04511100  | 0.26758800  |
| H | 1.18970700  | 6.68017700  | -0.43022700 |
| H | -0.01178700 | 5.91346400  | -1.47660000 |
| C | 3.84877000  | 0.72678700  | -0.25066800 |
| C | 2.64837200  | 1.17707100  | 0.53436000  |
| H | 3.98805500  | 1.40265500  | -1.10930500 |
| C | 1.39238200  | 1.23365400  | 0.03911900  |
| H | 2.79640000  | 1.40923200  | 1.58490100  |
| C | 5.10621200  | 0.84776800  | 0.62008600  |
| C | 5.38478400  | 2.29933900  | 1.01853000  |
| H | 5.97651100  | 0.45467800  | 0.08335900  |
| H | 4.99410500  | 0.23453100  | 1.52743000  |
| C | 6.61293800  | 2.43777100  | 1.91281200  |
| H | 5.51929900  | 2.89285300  | 0.10432100  |
| H | 4.51250200  | 2.72844300  | 1.52778000  |
| H | 6.79398900  | 3.48217700  | 2.18137900  |
| H | 6.48445000  | 1.87111600  | 2.84063000  |
| H | 7.50998700  | 2.05781200  | 1.41440000  |
| O | 0.98035700  | 1.01050300  | -1.17274000 |
| H | -0.10224700 | 0.15631000  | -1.29712500 |
| C | 1.44940300  | -2.67379400 | 1.70315900  |
| C | 2.81602600  | -1.62118500 | -0.04230100 |
| C | 1.64127600  | -2.19900900 | -0.44554900 |
| N | 0.87939800  | -2.78212500 | 0.53416100  |
| O | 1.22671000  | -2.20509200 | -1.72146800 |
| S | 2.99413200  | -1.87647700 | 1.66392800  |
| C | 3.61210400  | -0.68780200 | -0.90369300 |
| H | 2.93269800  | -0.50159400 | -1.74439500 |
| C | 0.80638600  | -3.13433400 | 2.94264000  |
| C | -0.26935500 | -4.02677500 | 2.84958900  |



|   |              |              |              |
|---|--------------|--------------|--------------|
| C | 1. 19994500  | -2. 65998100 | 4. 19769700  |
| C | -0. 94826700 | -4. 42309500 | 3. 99508200  |
| H | -0. 54384900 | -4. 41814600 | 1. 87649600  |
| C | 0. 52552100  | -3. 07031100 | 5. 34239400  |
| H | 2. 02538100  | -1. 95742100 | 4. 27788400  |
| C | -0. 55363800 | -3. 94594600 | 5. 24414800  |
| H | -1. 78004000 | -5. 11437700 | 3. 90678100  |
| H | 0. 83838700  | -2. 69880100 | 6. 31281600  |
| H | -1. 08132000 | -4. 25996500 | 6. 13885100  |
| C | 4. 90037100  | -1. 24687500 | -1. 47142700 |
| C | 5. 59983600  | -2. 29425600 | -0. 86660000 |
| C | 5. 43589100  | -0. 65349900 | -2. 62160700 |
| C | 6. 81427300  | -2. 73337700 | -1. 38079100 |
| H | 5. 18844300  | -2. 78012600 | 0. 01224800  |
| C | 6. 64660700  | -1. 07529900 | -3. 15087200 |
| H | 4. 88899500  | 0. 14868400  | -3. 10951600 |
| C | 7. 31898600  | -2. 10989500 | -2. 51244000 |
| H | 7. 36988500  | -3. 54304900 | -0. 92433700 |
| H | 7. 07242400  | -0. 62897200 | -4. 04077100 |
| N | 8. 60438500  | -2. 56337200 | -3. 05849600 |
| O | 9. 17554000  | -3. 47058600 | -2. 48045000 |
| O | 9. 02412000  | -2. 00195900 | -4. 05460300 |

**TS4(S5)**

|   |              |             |              |
|---|--------------|-------------|--------------|
| O | -0. 61708800 | 0. 02021500 | -0. 40730900 |
| N | 0. 04055600  | 3. 68609600 | 1. 54422900  |
| N | -1. 17515000 | 3. 96100300 | 2. 10889500  |
| N | -0. 98085500 | 1. 83639500 | 1. 54847200  |
| C | 2. 04945500  | 4. 69854200 | 2. 41351100  |
| H | 1. 99451100  | 3. 97981100 | 3. 22595500  |
| C | 3. 07063500  | 5. 63474000 | 2. 33283100  |
| H | 3. 84643500  | 5. 66029700 | 3. 08966800  |
| C | 3. 08302100  | 6. 53995500 | 1. 27257400  |
| H | 3. 87657100  | 7. 27653300 | 1. 19997800  |
| C | 2. 08737200  | 6. 50699500 | 0. 30391300  |
| H | 2. 11569600  | 7. 21822600 | -0. 51635200 |
| C | 1. 04588600  | 5. 57393600 | 0. 35234700  |
| C | 1. 06488100  | 4. 68830500 | 1. 42875700  |
| C | 0. 17830900  | 2. 40421600 | 1. 21416600  |
| C | -1. 77132700 | 2. 80460400 | 2. 10212000  |
| C | -3. 04997700 | 2. 21970500 | 2. 60746100  |
| H | -3. 87092900 | 2. 42600100 | 1. 91418200  |
| H | -3. 31435600 | 2. 62258500 | 3. 58524500  |
| C | -2. 67751000 | 0. 71220600 | 2. 66569600  |

|   |             |             |             |
|---|-------------|-------------|-------------|
| H | -3.52740600 | 0.05435300  | 2.48224400  |
| H | -2.27848500 | 0.48774500  | 3.65732800  |
| C | -1.52621100 | 0.48122900  | 1.65853500  |
| H | -0.73664600 | -0.12873300 | 2.08015600  |
| C | -1.85209400 | -0.09979100 | 0.25866200  |
| C | -2.19818000 | -1.58651800 | 0.40089000  |
| C | -3.20764100 | -2.21179600 | -0.32876100 |
| C | -1.36949900 | -2.37875100 | 1.20655600  |
| C | -3.42315000 | -3.58309700 | -0.19955900 |
| H | -3.82220400 | -1.65064500 | -1.02562000 |
| C | -1.62051900 | -3.73630800 | 1.34922300  |
| H | -0.49240300 | -1.96326800 | 1.70036400  |
| C | -2.65462200 | -4.35622400 | 0.65797000  |
| C | -2.91030000 | 0.76427000  | -0.42442500 |
| C | -4.26530700 | 0.67779100  | -0.09995800 |
| C | -2.49500800 | 1.75172800  | -1.32255900 |
| C | -5.18154800 | 1.56716200  | -0.65205600 |
| H | -4.62523700 | -0.08730400 | 0.58164200  |
| C | -3.42723100 | 2.62023900  | -1.88262100 |
| H | -1.44190800 | 1.82937400  | -1.58103600 |
| C | -4.77556800 | 2.54368300  | -1.55187000 |
| H | -2.82335500 | -5.42276700 | 0.74759300  |
| H | -5.49659200 | 3.22238000  | -1.99388100 |
| H | 1.52429100  | 1.19171000  | -2.21104700 |
| C | -0.75106000 | -4.51250800 | 2.30024100  |
| C | -4.50876700 | -4.21204500 | -1.02664400 |
| C | -2.96557500 | 3.70472500  | -2.81672200 |
| C | -6.60719800 | 1.51093400  | -0.18029100 |
| F | -6.72912500 | 2.12244500  | 1.01109500  |
| F | -7.02286100 | 0.24929900  | -0.01546300 |
| F | -7.44236000 | 2.11606900  | -1.02948000 |
| F | -2.67940400 | 4.83224300  | -2.13640200 |
| F | -3.90809200 | 4.02007500  | -3.71209800 |
| F | -1.85938900 | 3.35714800  | -3.47965000 |
| F | 0.54537100  | -4.21115300 | 2.14605900  |
| F | -1.06195000 | -4.22418200 | 3.57683300  |
| F | -0.88998300 | -5.83552400 | 2.14890400  |
| F | -5.72748500 | -3.87594400 | -0.57817800 |
| F | -4.43356400 | -5.54819000 | -1.02498600 |
| F | -4.44145300 | -3.80188200 | -2.30412100 |
| C | -0.03173400 | 5.55328700  | -0.71266700 |
| C | 0.57212600  | 5.32062000  | -2.10117000 |
| C | -0.84925900 | 6.84911900  | -0.65970300 |
| H | -0.71210100 | 4.71985600  | -0.50471900 |

|   |              |              |              |
|---|--------------|--------------|--------------|
| H | 1. 14566700  | 4. 39069700  | -2. 11821400 |
| H | -0. 22463600 | 5. 25360400  | -2. 84537400 |
| H | 1. 23370100  | 6. 14500900  | -2. 38628800 |
| H | -1. 30801200 | 6. 98275700  | 0. 32378500  |
| H | -0. 21290300 | 7. 71737800  | -0. 85952400 |
| H | -1. 63846500 | 6. 82741800  | -1. 41408500 |
| C | 3. 61841500  | 0. 57217200  | 0. 77096400  |
| C | 2. 25480100  | 1. 04543100  | 1. 26563700  |
| H | 4. 31186200  | 1. 42724600  | 0. 79732300  |
| C | 1. 39174800  | 1. 84424200  | 0. 46758200  |
| H | 2. 28882600  | 1. 47071700  | 2. 27460900  |
| C | 4. 18886100  | -0. 49596400 | 1. 71821900  |
| C | 4. 38559200  | -0. 01724600 | 3. 15712400  |
| H | 5. 15752600  | -0. 83465400 | 1. 32987800  |
| H | 3. 52147700  | -1. 36638200 | 1. 74086800  |
| C | 5. 01567100  | -1. 10092200 | 4. 02810000  |
| H | 5. 01833500  | 0. 88031200  | 3. 16135200  |
| H | 3. 42467900  | 0. 27857100  | 3. 59460400  |
| H | 5. 13462300  | -0. 76856800 | 5. 06281200  |
| H | 4. 39192800  | -2. 00097100 | 4. 02991800  |
| H | 6. 00245500  | -1. 38507500 | 3. 64953600  |
| O | 1. 41816600  | 2. 18027300  | -0. 72012300 |
| H | -0. 60727800 | -0. 53618300 | -1. 20601500 |
| C | 0. 94399600  | -2. 72415500 | -1. 46023500 |
| C | 2. 52416300  | -0. 88254200 | -1. 07013100 |
| C | 1. 57511000  | -0. 69180000 | -2. 04477400 |
| N | 0. 69731800  | -1. 71904700 | -2. 25805500 |
| O | 1. 39790300  | 0. 41619900  | -2. 78901300 |
| S | 2. 24336800  | -2. 43734100 | -0. 34614200 |
| C | 3. 60469800  | 0. 10288400  | -0. 71710000 |
| H | 3. 35347700  | 0. 99402900  | -1. 29970500 |
| C | 0. 18735100  | -3. 98580600 | -1. 51066200 |
| C | -0. 90502200 | -4. 08124200 | -2. 38174900 |
| C | 0. 54782500  | -5. 09613700 | -0. 73979700 |
| C | -1. 62444500 | -5. 26662600 | -2. 47310400 |
| H | -1. 17066400 | -3. 21837100 | -2. 98349500 |
| C | -0. 18301000 | -6. 27605700 | -0. 82533800 |
| H | 1. 39748200  | -5. 03953700 | -0. 06567700 |
| C | -1. 27089600 | -6. 36472200 | -1. 69110700 |
| H | -2. 47445800 | -5. 32857400 | -3. 14443600 |
| H | 0. 09933900  | -7. 12580900 | -0. 21275700 |
| H | -1. 84215800 | -7. 28515100 | -1. 75800200 |
| C | 5. 00840700  | -0. 28538900 | -1. 17310600 |
| C | 5. 37940200  | -1. 58439900 | -1. 52675800 |

|   |            |             |             |
|---|------------|-------------|-------------|
| C | 5.97630700 | 0.72753800  | -1.23913700 |
| C | 6.68213300 | -1.87671700 | -1.91702000 |
| H | 4.64703600 | -2.38250600 | -1.51051100 |
| C | 7.28034500 | 0.45870800  | -1.62505900 |
| H | 5.69676300 | 1.74842400  | -0.99377700 |
| C | 7.61140900 | -0.84956400 | -1.95364600 |
| H | 6.98406200 | -2.87953500 | -2.19244600 |
| H | 8.03578500 | 1.23230500  | -1.68440000 |
| C | 0.89526200 | -0.42170300 | 3.71134800  |
| O | 0.52463600 | 0.74853500  | 3.85281300  |
| O | 1.19022500 | -0.95328500 | 2.56032700  |
| H | 1.56456300 | 0.00217900  | 1.75723400  |
| C | 1.03577900 | -1.35981000 | 4.89258600  |
| H | 0.54822400 | -2.31176600 | 4.67019900  |
| H | 2.09845600 | -1.56785400 | 5.05035100  |
| H | 0.61472200 | -0.90940700 | 5.79053600  |
| N | 8.98949900 | -1.15181700 | -2.36250900 |
| O | 9.78844300 | -0.23249100 | -2.37399900 |
| O | 9.24935200 | -2.30292400 | -2.66235500 |

**3(S6)**

|   |             |             |             |
|---|-------------|-------------|-------------|
| O | -0.68863300 | -0.33933900 | -1.51816900 |
| N | 1.54579500  | 2.10257000  | 1.89462700  |
| N | 0.57664000  | 2.21707200  | 2.85656200  |
| N | 0.02114900  | 0.74356500  | 1.30925100  |
| C | 3.46704700  | 2.58566200  | 3.24586800  |
| H | 3.02854000  | 1.91910200  | 3.98100000  |
| C | 4.68778400  | 3.20498400  | 3.46802500  |
| H | 5.22547600  | 3.02899800  | 4.39297300  |
| C | 5.21269300  | 4.04220000  | 2.48605700  |
| H | 6.17277000  | 4.52404200  | 2.63867600  |
| C | 4.50880800  | 4.26591100  | 1.30978400  |
| H | 4.92781400  | 4.92974400  | 0.55936300  |
| C | 3.26840000  | 3.66736400  | 1.05532600  |
| C | 2.78541500  | 2.81673300  | 2.05260000  |
| C | 1.24169000  | 1.18883900  | 0.96113900  |
| C | -0.33613100 | 1.38033800  | 2.46651800  |
| C | -1.63344000 | 0.87498800  | 2.99611000  |
| H | -2.41803500 | 1.62223900  | 2.85190100  |
| H | -1.56526100 | 0.65888600  | 4.06302700  |
| C | -1.84034000 | -0.40526800 | 2.14274600  |
| H | -2.88299100 | -0.55223700 | 1.85940200  |
| H | -1.54070300 | -1.28534900 | 2.71832900  |
| C | -0.91818100 | -0.31641000 | 0.88839600  |

|   |             |             |             |
|---|-------------|-------------|-------------|
| H | -0.34385300 | -1.23661900 | 0.75964500  |
| C | -1.58721500 | -0.02455100 | -0.50473500 |
| C | -2.76849000 | -0.99087400 | -0.68342100 |
| C | -4.01747600 | -0.59436100 | -1.15438500 |
| C | -2.54769100 | -2.35077600 | -0.43681000 |
| C | -5.03584200 | -1.53009600 | -1.33202900 |
| H | -4.21843600 | 0.44401500  | -1.39384600 |
| C | -3.57684600 | -3.26933400 | -0.60413600 |
| H | -1.56226900 | -2.70917700 | -0.13969900 |
| C | -4.83387600 | -2.87230800 | -1.04758700 |
| C | -1.99748900 | 1.45016100  | -0.54953900 |
| C | -3.01948100 | 1.94785600  | 0.25824000  |
| C | -1.28973400 | 2.34415700  | -1.35591800 |
| C | -3.31016000 | 3.30906400  | 0.28393200  |
| H | -3.61987700 | 1.27626100  | 0.86648400  |
| C | -1.61003500 | 3.69856700  | -1.34150000 |
| H | -0.47710000 | 1.98357900  | -1.97827900 |
| C | -2.61142600 | 4.20083700  | -0.51632500 |
| H | -5.63228300 | -3.59366400 | -1.17796200 |
| H | -2.84108400 | 5.26012700  | -0.49987200 |
| H | 0.12059500  | -1.88027400 | -2.08656200 |
| C | -3.32441900 | -4.70640600 | -0.24340100 |
| C | -6.35655800 | -1.06848900 | -1.88327100 |
| C | -0.90631300 | 4.63085600  | -2.28799500 |
| C | -4.38056600 | 3.77573800  | 1.22798900  |
| F | -4.00935700 | 3.56905600  | 2.50785100  |
| F | -5.52009400 | 3.09598200  | 1.04911700  |
| F | -4.64821800 | 5.07685400  | 1.09420800  |
| F | 0.34124700  | 4.21649400  | -2.55481600 |
| F | -0.82361600 | 5.87271100  | -1.78464700 |
| F | -1.55031300 | 4.72192500  | -3.45759300 |
| F | -2.09920500 | -5.09985800 | -0.61108300 |
| F | -3.40643600 | -4.89328700 | 1.08943900  |
| F | -4.21218300 | -5.53091300 | -0.80999600 |
| F | -6.68701300 | 0.14096800  | -1.40678400 |
| F | -7.34617700 | -1.91528400 | -1.56958300 |
| F | -6.32499000 | -0.96841400 | -3.21867100 |
| C | 2.52862500  | 3.99229000  | -0.23040200 |
| C | 3.36011800  | 3.62243600  | -1.46336800 |
| C | 2.14715600  | 5.47866900  | -0.24493400 |
| H | 1.60481000  | 3.40514700  | -0.27752600 |
| H | 3.63668000  | 2.56607700  | -1.44330900 |
| H | 2.77847000  | 3.80829200  | -2.36874500 |
| H | 4.27278400  | 4.22549900  | -1.51488900 |

|   |              |              |              |
|---|--------------|--------------|--------------|
| H | 1. 50924100  | 5. 73418700  | 0. 60601200  |
| H | 3. 04103700  | 6. 10875800  | -0. 19653600 |
| H | 1. 61328500  | 5. 72158400  | -1. 16483200 |
| C | 4. 30383900  | -0. 27258100 | -0. 81953300 |
| C | 3. 32904600  | 0. 35522000  | 0. 13891900  |
| H | 4. 51703400  | 0. 44174900  | -1. 63076900 |
| C | 2. 07421900  | 0. 73472400  | -0. 18948700 |
| H | 3. 63368600  | 0. 44359600  | 1. 17810700  |
| C | 5. 63518600  | -0. 54049300 | -0. 10499400 |
| C | 6. 28694400  | 0. 75345000  | 0. 38447700  |
| H | 6. 31892700  | -1. 05349000 | -0. 78709100 |
| H | 5. 47085600  | -1. 21947100 | 0. 74409100  |
| H | 6. 46170500  | 1. 43214000  | -0. 45768900 |
| H | 5. 66020000  | 1. 28837500  | 1. 10620500  |
| O | 1. 49690000  | 0. 73715300  | -1. 35486100 |
| H | 0. 25523900  | 0. 14809300  | -1. 41963600 |
| C | 1. 39112600  | -3. 25388600 | 1. 12805200  |
| C | 2. 77808300  | -2. 33565000 | -0. 67793500 |
| C | 1. 47187500  | -2. 61206900 | -0. 98451800 |
| N | 0. 70017100  | -3. 12086700 | 0. 02869900  |
| O | 0. 94098000  | -2. 40144300 | -2. 19973000 |
| S | 3. 06106200  | -2. 79894200 | 0. 96909500  |
| C | 3. 68059600  | -1. 51811200 | -1. 55330900 |
| H | 2. 98086300  | -1. 09737600 | -2. 28525100 |
| C | 0. 78315600  | -3. 68532200 | 2. 39549900  |
| C | -0. 47127000 | -4. 30819400 | 2. 36147000  |
| C | 1. 39167800  | -3. 43428600 | 3. 62918200  |
| C | -1. 11032000 | -4. 65721800 | 3. 54465900  |
| H | -0. 91921300 | -4. 53209600 | 1. 39992800  |
| C | 0. 75383400  | -3. 79793600 | 4. 81019900  |
| H | 2. 35895800  | -2. 93997900 | 3. 66578600  |
| C | -0. 50063200 | -4. 40273500 | 4. 77234000  |
| H | -2. 08236500 | -5. 13775700 | 3. 50098800  |
| H | 1. 23417200  | -3. 60030300 | 5. 76309700  |
| H | -0. 99830400 | -4. 67985400 | 5. 69600000  |
| C | 4. 73757400  | -2. 29143600 | -2. 31932500 |
| C | 5. 24232500  | -3. 51755800 | -1. 88560600 |
| C | 5. 26809200  | -1. 72461600 | -3. 48236200 |
| C | 6. 26084400  | -4. 15630800 | -2. 58998300 |
| H | 4. 83075300  | -3. 98430200 | -0. 99534200 |
| C | 6. 28593800  | -2. 35812700 | -4. 18651800 |
| H | 4. 87061600  | -0. 77720000 | -3. 83920800 |
| C | 6. 78934900  | -3. 57786100 | -3. 73941000 |
| H | 6. 63895000  | -5. 11153800 | -2. 23897400 |

|   |            |             |             |
|---|------------|-------------|-------------|
| H | 6.68130300 | -1.90399500 | -5.08984300 |
| H | 7.58128200 | -4.07678100 | -4.28865400 |
| H | 7.25062100 | 0.55387400  | 0.86037300  |

**TS4(S6)**

|   |             |             |             |
|---|-------------|-------------|-------------|
| O | -0.16656900 | 0.14127400  | -0.43449000 |
| N | 3.18357800  | 1.76889400  | 1.52154500  |
| N | 2.66325500  | 2.84345800  | 2.19062100  |
| N | 1.10197000  | 1.41128500  | 1.57585500  |
| C | 5.25721500  | 0.77012800  | 2.24212600  |
| H | 4.69084800  | 0.30340900  | 3.04273400  |
| C | 6.62153300  | 0.56359300  | 2.09496900  |
| H | 7.15163600  | -0.08199700 | 2.78600500  |
| C | 7.29803800  | 1.19631600  | 1.05306800  |
| H | 8.36491500  | 1.04181400  | 0.92859000  |
| C | 6.61703200  | 2.02276800  | 0.16779600  |
| H | 7.16017700  | 2.50379900  | -0.64035100 |
| C | 5.24129200  | 2.24911600  | 0.28442000  |
| C | 4.60020600  | 1.60394100  | 1.34086600  |
| C | 2.25478300  | 0.88823100  | 1.15626100  |
| C | 1.38788300  | 2.58751600  | 2.21139200  |
| C | 0.15370400  | 3.17999800  | 2.80999200  |
| H | -0.22113100 | 4.00097200  | 2.19139700  |
| H | 0.34033100  | 3.56160300  | 3.81391700  |
| C | -0.79167500 | 1.94677000  | 2.80802600  |
| H | -1.84161500 | 2.21297400  | 2.68316500  |
| H | -0.68261700 | 1.41949900  | 3.75841500  |
| C | -0.29349500 | 0.98386600  | 1.70460100  |
| H | -0.26365100 | -0.04307400 | 2.04723300  |
| C | -1.00203900 | 0.98079200  | 0.32525000  |
| C | -2.37804300 | 0.32015200  | 0.47076000  |
| C | -3.52066700 | 0.77492600  | -0.18517300 |
| C | -2.45852000 | -0.87476200 | 1.19800600  |
| C | -4.72656700 | 0.08722500  | -0.05660300 |
| H | -3.48535100 | 1.65154100  | -0.82437100 |
| C | -3.67587900 | -1.52475400 | 1.34631300  |
| H | -1.57074400 | -1.34099900 | 1.62261700  |
| C | -4.82781200 | -1.05008700 | 0.73076300  |
| C | -1.00566200 | 2.39366900  | -0.25525000 |
| C | -1.89936700 | 3.37434200  | 0.17850500  |
| C | -0.00944100 | 2.74762100  | -1.16999600 |
| C | -1.79074200 | 4.68233600  | -0.28264100 |
| H | -2.69544300 | 3.13035900  | 0.87582800  |
| C | 0.07226300  | 4.05574500  | -1.63823100 |

|   |             |             |             |
|---|-------------|-------------|-------------|
| H | 0.69279600  | 1.99163700  | -1.51280900 |
| C | -0.80914900 | 5.03711700  | -1.19832600 |
| H | -5.76707800 | -1.58256400 | 0.82142700  |
| H | -0.74051200 | 6.05380600  | -1.56915900 |
| H | 2.00968300  | -0.67277500 | -2.38271200 |
| C | -3.71552600 | -2.74483000 | 2.22484700  |
| C | -5.92156200 | 0.60271200  | -0.80746500 |
| C | 1.17074600  | 4.43780200  | -2.59158600 |
| C | -2.69842100 | 5.72603200  | 0.30413000  |
| F | -2.24731000 | 6.11340400  | 1.51040900  |
| F | -3.93900500 | 5.25659400  | 0.48447500  |
| F | -2.77479800 | 6.81643300  | -0.46438900 |
| F | 2.25784800  | 4.86837000  | -1.92146800 |
| F | 0.79624100  | 5.43360600  | -3.40321300 |
| F | 1.55990500  | 3.40780500  | -3.34714200 |
| F | -2.67939800 | -3.56048600 | 1.99136500  |
| F | -3.64591500 | -2.40001500 | 3.52424900  |
| F | -4.84318900 | -3.44889700 | 2.06529900  |
| F | -6.38858300 | 1.74032100  | -0.27101200 |
| F | -6.92825800 | -0.27919700 | -0.81957700 |
| F | -5.60746100 | 0.87922800  | -2.08406200 |
| C | 4.51559900  | 3.15301500  | -0.69136000 |
| C | 4.65992000  | 2.63950800  | -2.12739000 |
| C | 5.02155200  | 4.59332600  | -0.55040000 |
| H | 3.44801100  | 3.14742300  | -0.44447700 |
| H | 4.28958000  | 1.61457400  | -2.20611500 |
| H | 4.08455500  | 3.27246900  | -2.80674100 |
| H | 5.70609100  | 2.65976300  | -2.44957800 |
| H | 4.87583400  | 4.96164500  | 0.46879000  |
| H | 6.08940200  | 4.65359000  | -0.78482300 |
| H | 4.48645800  | 5.24978800  | -1.23972300 |
| C | 2.96218200  | -2.89256700 | 0.39219700  |
| C | 2.49384800  | -1.57630700 | 1.00484100  |
| H | 4.06326000  | -2.88766400 | 0.36355700  |
| C | 2.54611900  | -0.34614800 | 0.29779700  |
| H | 2.87546800  | -1.41275200 | 2.01864700  |
| C | 2.55154600  | -4.07266200 | 1.28926200  |
| C | 3.13696500  | -3.99047800 | 2.69870600  |
| H | 2.88741700  | -5.00165700 | 0.81676200  |
| H | 1.45900600  | -4.11771200 | 1.36682600  |
| H | 4.22766900  | -3.89097400 | 2.66442000  |
| H | 2.74177700  | -3.13894700 | 3.26153100  |
| O | 2.77636300  | -0.06062100 | -0.88134300 |
| H | -0.62750900 | -0.16695400 | -1.23503500 |



|   |             |             |             |
|---|-------------|-------------|-------------|
| C | -1.37814700 | -2.72221900 | -1.63110200 |
| C | 1.06328800  | -2.83128500 | -1.36352800 |
| C | 0.57445100  | -1.89714200 | -2.24469800 |
| N | -0.78405000 | -1.83892100 | -2.38996700 |
| O | 1.29312900  | -1.00563100 | -2.95452400 |
| S | -0.29213400 | -3.64313100 | -0.64154900 |
| C | 2.52240400  | -3.08016900 | -1.09227800 |
| H | 3.03135100  | -2.28541100 | -1.64542100 |
| C | -2.83742800 | -2.91550800 | -1.63201500 |
| C | -3.62818700 | -2.06335600 | -2.41316200 |
| C | -3.45041300 | -3.94056700 | -0.90365000 |
| C | -5.00649000 | -2.23399300 | -2.45888400 |
| H | -3.14283700 | -1.27797500 | -2.98305700 |
| C | -4.83147100 | -4.09932300 | -0.94241600 |
| H | -2.84947300 | -4.61344900 | -0.29888400 |
| C | -5.61356200 | -3.24708600 | -1.71897200 |
| H | -5.61070000 | -1.56365600 | -3.06125900 |
| H | -5.29548700 | -4.89034500 | -0.36263500 |
| H | -6.69148300 | -3.37063600 | -1.74929300 |
| C | 3.07913400  | -4.38378500 | -1.66145500 |
| C | 2.29585600  | -5.48344600 | -2.01080900 |
| C | 4.46549700  | -4.47944000 | -1.83178500 |
| C | 2.88192400  | -6.65024400 | -2.49988700 |
| H | 1.21701500  | -5.43494100 | -1.91551000 |
| C | 5.05339700  | -5.64065100 | -2.31836600 |
| H | 5.09065500  | -3.62320400 | -1.58833000 |
| C | 4.26070000  | -6.73659500 | -2.65203900 |
| H | 2.25137900  | -7.49287000 | -2.76630800 |
| H | 6.13050800  | -5.68758900 | -2.44576500 |
| C | 0.55937700  | -1.64391400 | 3.51162000  |
| O | 1.25228000  | -0.64575700 | 3.73527400  |
| O | 0.29947900  | -2.09324000 | 2.31819500  |
| H | 1.26018300  | -1.72868300 | 1.52177300  |
| C | -0.08090700 | -2.43947800 | 4.63110500  |
| H | -1.15697800 | -2.51655100 | 4.45503800  |
| H | 0.32057100  | -3.45647200 | 4.61588200  |
| H | 0.11702300  | -1.97358200 | 5.59556700  |
| H | 4.71488600  | -7.64485400 | -3.03477900 |
| H | 2.90314200  | -4.89456800 | 3.26723100  |

**3(S7)**

|   |             |             |             |
|---|-------------|-------------|-------------|
| O | -0.79503600 | -0.13722100 | -1.65523100 |
| N | 1.53665700  | 1.93875400  | 1.92548800  |
| N | 0.57393400  | 2.02528900  | 2.89681100  |

|   |             |             |             |
|---|-------------|-------------|-------------|
| N | -0.05145200 | 0.70367800  | 1.24267500  |
| C | 3.48639700  | 2.21160200  | 3.29569500  |
| H | 3.02019300  | 1.50532000  | 3.97459100  |
| C | 4.73747500  | 2.74950800  | 3.55850900  |
| H | 5.27111000  | 2.46791200  | 4.45937400  |
| C | 5.29692600  | 3.64327800  | 2.64803600  |
| H | 6.27974500  | 4.06430800  | 2.83310300  |
| C | 4.59918100  | 3.99985600  | 1.50109900  |
| H | 5.04637600  | 4.70424200  | 0.80594900  |
| C | 3.33081100  | 3.48359400  | 1.20663000  |
| C | 2.81048000  | 2.57676700  | 2.13317500  |
| C | 1.18857500  | 1.11536500  | 0.92528500  |
| C | -0.37814900 | 1.26598200  | 2.44650600  |
| C | -1.69956200 | 0.78517000  | 2.93830700  |
| H | -2.44659400 | 1.57840800  | 2.85109100  |
| H | -1.64458100 | 0.48641900  | 3.98586500  |
| C | -1.96612000 | -0.41586400 | 1.99118500  |
| H | -3.01404600 | -0.49036100 | 1.69897600  |
| H | -1.71042600 | -1.35065000 | 2.49798700  |
| C | -1.03723600 | -0.27790300 | 0.74616100  |
| H | -0.50557200 | -1.21179800 | 0.55139100  |
| C | -1.68436600 | 0.14380500  | -0.62373500 |
| C | -2.90528800 | -0.75535900 | -0.87165100 |
| C | -4.13973900 | -0.27417300 | -1.29956400 |
| C | -2.73822200 | -2.13796600 | -0.73121500 |
| C | -5.19646400 | -1.15233000 | -1.53807100 |
| H | -4.29981000 | 0.78662800  | -1.45764900 |
| C | -3.80514200 | -2.99894500 | -0.95636700 |
| H | -1.76551000 | -2.55554000 | -0.47199900 |
| C | -5.04786600 | -2.51913700 | -1.35684700 |
| C | -2.02912000 | 1.63450900  | -0.56113100 |
| C | -3.02861100 | 2.11649100  | 0.28378500  |
| C | -1.28069800 | 2.55341900  | -1.29988900 |
| C | -3.25805800 | 3.48359600  | 0.41107400  |
| H | -3.65877300 | 1.42955000  | 0.84266600  |
| C | -1.53943100 | 3.91619200  | -1.18351400 |
| H | -0.48354400 | 2.20420700  | -1.94818500 |
| C | -2.51865500 | 4.40021000  | -0.32174900 |
| H | -5.87607600 | -3.19578500 | -1.53342800 |
| H | -2.70029100 | 5.46458200  | -0.22588900 |
| H | -0.02485800 | -1.66471000 | -2.33870200 |
| C | -3.61203800 | -4.46761700 | -0.70251000 |
| C | -6.50058400 | -0.59820500 | -2.04128900 |
| C | -0.79106100 | 4.88379000  | -2.05755100 |

|   |             |             |             |
|---|-------------|-------------|-------------|
| C | -4.30740100 | 3.92648600  | 1.38953500  |
| F | -3.94592500 | 3.61217100  | 2.65017800  |
| F | -5.47529300 | 3.31118000  | 1.16545000  |
| F | -4.51864100 | 5.24421900  | 1.35100500  |
| F | 0.44013600  | 4.43783000  | -2.34806500 |
| F | -0.66042400 | 6.08181600  | -1.46569100 |
| F | -1.42212200 | 5.08538100  | -3.22035700 |
| F | -2.39855400 | -4.88077000 | -1.08669800 |
| F | -3.71826600 | -4.74996100 | 0.61189200  |
| F | -4.52395100 | -5.21216500 | -1.33750300 |
| F | -6.77564200 | 0.58775600  | -1.47843300 |
| F | -7.52296500 | -1.42260000 | -1.77651300 |
| F | -6.47561200 | -0.40666600 | -3.36686600 |
| C | 2.60453100  | 3.94446000  | -0.04477900 |
| C | 3.41541300  | 3.63403000  | -1.30756300 |
| C | 2.29283500  | 5.44335000  | 0.06005200  |
| H | 1.65437500  | 3.40613900  | -0.13297400 |
| H | 3.63035400  | 2.56558400  | -1.37862800 |
| H | 2.84678800  | 3.92908800  | -2.19195800 |
| H | 4.36120200  | 4.18603000  | -1.31076200 |
| H | 1.67417300  | 5.66075100  | 0.93543000  |
| H | 3.21540900  | 6.02623900  | 0.14684200  |
| H | 1.76360800  | 5.78148100  | -0.83213500 |
| C | 4.20287600  | -0.32854700 | -0.94581500 |
| C | 3.23563700  | 0.25520700  | 0.04667500  |
| H | 4.43869300  | 0.43395500  | -1.70491900 |
| C | 2.00198100  | 0.71382700  | -0.25830500 |
| H | 3.52834500  | 0.24273400  | 1.09279200  |
| C | 5.51916600  | -0.66865500 | -0.23461800 |
| C | 6.19510500  | 0.57910100  | 0.33908800  |
| H | 6.20599600  | -1.15864800 | -0.93263700 |
| H | 5.33071600  | -1.38822000 | 0.57725300  |
| C | 7.48763500  | 0.25896700  | 1.08352100  |
| H | 6.40142100  | 1.27510600  | -0.48515400 |
| H | 5.50911200  | 1.10868200  | 1.01258000  |
| H | 7.95418800  | 1.16493200  | 1.48067500  |
| H | 7.29485700  | -0.41445700 | 1.92494700  |
| H | 8.21098800  | -0.23260200 | 0.42572100  |
| O | 1.43343600  | 0.83525300  | -1.42150700 |
| H | 0.16722100  | 0.30457100  | -1.52528600 |
| C | 1.15463000  | -3.28111700 | 0.78266500  |
| C | 2.60903800  | -2.34276600 | -0.95978300 |
| C | 1.29133700  | -2.52212900 | -1.28777400 |
| N | 0.48272200  | -3.04458900 | -0.31123500 |

|   |             |             |             |
|---|-------------|-------------|-------------|
| O | 0.77999000  | -2.20055600 | -2.48691000 |
| S | 2.85056400  | -2.92154700 | 0.65815600  |
| C | 3.55662100  | -1.50682600 | -1.76768100 |
| H | 2.88609800  | -1.01744500 | -2.48424100 |
| C | 0.50682200  | -3.73678500 | 2.02024100  |
| C | -0.77757000 | -4.29346100 | 1.94586300  |
| C | 1.09720100  | -3.56421200 | 3.27405800  |
| C | -1.45294400 | -4.65164300 | 3.10299000  |
| H | -1.22259300 | -4.45815500 | 0.97087100  |
| C | 0.41618100  | -3.93912300 | 4.42751400  |
| H | 2.08497900  | -3.11721500 | 3.35195500  |
| C | -0.86807900 | -4.48277500 | 4.36365700  |
| H | -2.44900400 | -5.07947200 | 3.02340500  |
| H | 0.88699100  | -3.79696900 | 5.39650400  |
| C | 4.60525400  | -2.26336500 | -2.56043100 |
| C | 5.06418100  | -3.52904800 | -2.19515800 |
| C | 5.17761900  | -1.64103200 | -3.67421200 |
| C | 6.07920100  | -4.15284700 | -2.91781700 |
| H | 4.61898200  | -4.03811800 | -1.34513100 |
| C | 6.19200400  | -2.25952300 | -4.39628100 |
| H | 4.81598100  | -0.66131600 | -3.97803500 |
| C | 6.64972000  | -3.51962300 | -4.01719300 |
| H | 6.42143200  | -5.13938600 | -2.62074600 |
| H | 6.62023700  | -1.76181300 | -5.26083700 |
| H | 7.43863200  | -4.00701700 | -4.58094000 |
| C | -1.60264300 | -4.90085500 | 5.61061500  |
| H | -1.64901900 | -5.99187800 | 5.68624000  |
| H | -1.10812300 | -4.52478300 | 6.50886400  |
| H | -2.63197700 | -4.53160200 | 5.60553100  |

**TS4(S7)**

|   |             |             |             |
|---|-------------|-------------|-------------|
| O | -0.09727600 | 0.27465100  | -0.43659500 |
| N | 3.43665900  | 1.58115600  | 1.43911600  |
| N | 3.02739800  | 2.67874500  | 2.14698400  |
| N | 1.33524900  | 1.39475100  | 1.55124700  |
| C | 5.44670400  | 0.40638600  | 2.06869500  |
| H | 4.87171800  | -0.02983900 | 2.88031400  |
| C | 6.78432300  | 0.09515300  | 1.86952200  |
| H | 7.28427800  | -0.60434700 | 2.52986900  |
| C | 7.47328700  | 0.69255000  | 0.81500400  |
| H | 8.51947500  | 0.45622100  | 0.64990800  |
| C | 6.83079000  | 1.58769800  | -0.03145300 |
| H | 7.38277200  | 2.04008900  | -0.85009000 |
| C | 5.48244500  | 1.92026400  | 0.13804400  |

|   |             |             |             |
|---|-------------|-------------|-------------|
| C | 4.82833600  | 1.30744700  | 1.20577300  |
| C | 2.42794800  | 0.78843500  | 1.08512900  |
| C | 1.73650900  | 2.52769600  | 2.20265000  |
| C | 0.57434900  | 3.20440600  | 2.85364700  |
| H | 0.24741200  | 4.06585600  | 2.26356000  |
| H | 0.82327300  | 3.54802100  | 3.85775800  |
| C | -0.46710000 | 2.05136600  | 2.85999400  |
| H | -1.49572600 | 2.40326400  | 2.77691700  |
| H | -0.36956900 | 1.49630400  | 3.79563600  |
| C | -0.08465100 | 1.07677700  | 1.72108900  |
| H | -0.12628900 | 0.04348500  | 2.04310700  |
| C | -0.83767800 | 1.15995700  | 0.36812800  |
| C | -2.25466400 | 0.60309000  | 0.55007000  |
| C | -3.38434300 | 1.16577600  | -0.04156000 |
| C | -2.39677900 | -0.60775900 | 1.24081100  |
| C | -4.63316400 | 0.56664900  | 0.11635800  |
| H | -3.30771100 | 2.05813400  | -0.65463200 |
| C | -3.65300300 | -1.17102800 | 1.41708300  |
| H | -1.53080500 | -1.15201300 | 1.61486500  |
| C | -4.78868200 | -0.58855800 | 0.86789500  |
| C | -0.74919900 | 2.58117500  | -0.18435700 |
| C | -1.54542400 | 3.62018100  | 0.30040800  |
| C | 0.24039900  | 2.87525600  | -1.12721800 |
| C | -1.34830200 | 4.92523300  | -0.13930800 |
| H | -2.33332000 | 3.42562700  | 1.02209000  |
| C | 0.41112200  | 4.18282400  | -1.57232100 |
| H | 0.86798000  | 2.07387300  | -1.50948600 |
| C | -0.37321800 | 5.22121800  | -1.08238600 |
| H | -5.76190600 | -1.05135000 | 0.98204200  |
| H | -0.23563900 | 6.23732400  | -1.43517100 |
| H | 1.96350100  | -0.63214000 | -2.49736600 |
| C | -3.75095800 | -2.42010200 | 2.24921800  |
| C | -5.81783100 | 1.19783600  | -0.55841900 |
| C | 1.50533800  | 4.49692400  | -2.55501800 |
| C | -2.14931200 | 6.02408200  | 0.49962200  |
| F | -1.63144400 | 6.34420900  | 1.69880800  |
| F | -3.41795900 | 5.65196300  | 0.71014700  |
| F | -2.16041300 | 7.13559200  | -0.24189400 |
| F | 2.64682000  | 4.81650700  | -1.91379000 |
| F | 1.18957300  | 5.54227100  | -3.32852200 |
| F | 1.78040400  | 3.45882500  | -3.34848400 |
| F | -2.80567300 | -3.31100800 | 1.92404500  |
| F | -3.58015000 | -2.13939900 | 3.55424600  |
| F | -4.94369200 | -3.01725400 | 2.12818700  |

|   |             |             |             |
|---|-------------|-------------|-------------|
| F | -6.20297200 | 2.32062800  | 0.06652700  |
| F | -6.87549000 | 0.37552000  | -0.59109600 |
| F | -5.53008900 | 1.54039400  | -1.82437100 |
| C | 4.79878000  | 2.89962100  | -0.79434100 |
| C | 4.86016000  | 2.41323200  | -2.24555600 |
| C | 5.41769900  | 4.29343000  | -0.63679000 |
| H | 3.74167600  | 2.96849000  | -0.51405500 |
| H | 4.41342800  | 1.42021100  | -2.33529700 |
| H | 4.31132300  | 3.10321800  | -2.89053700 |
| H | 5.89424900  | 2.36603800  | -2.60210700 |
| H | 5.33007700  | 4.64653300  | 0.39438200  |
| H | 6.47993800  | 4.27739800  | -0.90206200 |
| H | 4.91549100  | 5.00578400  | -1.29464000 |
| C | 2.79071500  | -3.01642200 | 0.19345700  |
| C | 2.46227000  | -1.68256100 | 0.85827000  |
| H | 3.88616500  | -3.11637200 | 0.14188900  |
| C | 2.58957000  | -0.43970900 | 0.18432500  |
| H | 2.89690700  | -1.58098700 | 1.85886900  |
| C | 2.27773300  | -4.18167600 | 1.05493100  |
| C | 2.87583700  | -4.23372900 | 2.46123000  |
| H | 2.50585100  | -5.12483100 | 0.54376300  |
| H | 1.18702500  | -4.11753000 | 1.15485300  |
| C | 2.37520600  | -5.44730800 | 3.24016700  |
| H | 3.97155400  | -4.26043600 | 2.39230900  |
| H | 2.62260100  | -3.32359400 | 3.01819000  |
| H | 2.78436400  | -5.47461600 | 4.25386700  |
| H | 1.28276800  | -5.42947900 | 3.31504600  |
| H | 2.65499500  | -6.37848600 | 2.73768500  |
| O | 2.80150400  | -0.13460100 | -0.99366300 |
| H | -0.60407000 | 0.02878900  | -1.23119800 |
| C | -1.56275400 | -2.41456400 | -1.70877800 |
| C | 0.86823300  | -2.73309200 | -1.51248100 |
| C | 0.43640500  | -1.73700700 | -2.35414800 |
| N | -0.91648000 | -1.56144600 | -2.45965300 |
| O | 1.20902700  | -0.88834200 | -3.05981200 |
| S | -0.53193500 | -3.45135200 | -0.77506100 |
| C | 2.30741600  | -3.11084000 | -1.28663000 |
| H | 2.86985800  | -2.34159400 | -1.82372800 |
| C | -3.03114100 | -2.48251800 | -1.66348300 |
| C | -3.77612300 | -1.54086100 | -2.38077000 |
| C | -3.70928300 | -3.47520200 | -0.94636500 |
| C | -5.16508800 | -1.58865000 | -2.36938400 |
| H | -3.25038500 | -0.77804200 | -2.94578700 |
| C | -5.09678200 | -3.50487300 | -0.92944900 |

|   |             |             |             |
|---|-------------|-------------|-------------|
| H | -3.15150200 | -4.22191000 | -0.38862600 |
| C | -5.84877200 | -2.56160300 | -1.63789200 |
| H | -5.73004300 | -0.84350600 | -2.92235100 |
| H | -5.60707800 | -4.27071200 | -0.35130800 |
| C | 2.73963600  | -4.43519800 | -1.91352700 |
| C | 1.85678300  | -5.44453200 | -2.29642900 |
| C | 4.10995800  | -4.64770400 | -2.10704600 |
| C | 2.33018500  | -6.63802000 | -2.84020300 |
| H | 0.78775200  | -5.30302600 | -2.18428300 |
| C | 4.58562700  | -5.83572600 | -2.64842400 |
| H | 4.81240500  | -3.86195800 | -1.83808300 |
| C | 3.69391700  | -6.84149800 | -3.01476000 |
| H | 1.62348200  | -7.40890100 | -3.13150800 |
| H | 5.65280700  | -5.97361500 | -2.79260300 |
| H | 4.06033300  | -7.77034800 | -3.43987000 |
| C | 0.65473100  | -1.63395800 | 3.45312900  |
| O | 1.42596000  | -0.68841500 | 3.64645300  |
| O | 0.30062300  | -2.05067400 | 2.27181300  |
| H | 1.24089500  | -1.74704100 | 1.43407400  |
| C | 0.03657300  | -2.40402100 | 4.60213600  |
| H | -1.03737300 | -2.51709800 | 4.43733500  |
| H | 0.47015400  | -3.40855100 | 4.62320300  |
| H | 0.23279900  | -1.90151800 | 5.54846000  |
| C | -7.35402300 | -2.59889600 | -1.60384000 |
| H | -7.78162300 | -1.71855500 | -2.08698400 |
| H | -7.73614100 | -3.48853600 | -2.11408000 |
| H | -7.72215400 | -2.63203500 | -0.57352500 |
