# Supplementary figures and images for: Mechanistic study on the NHC-catalyzed [3+4] annulation of enals and thiazolones
Source: Royal Society of Chemistry journal article supplement (doi:10.1039/d1nj01617b), 2021-01-01

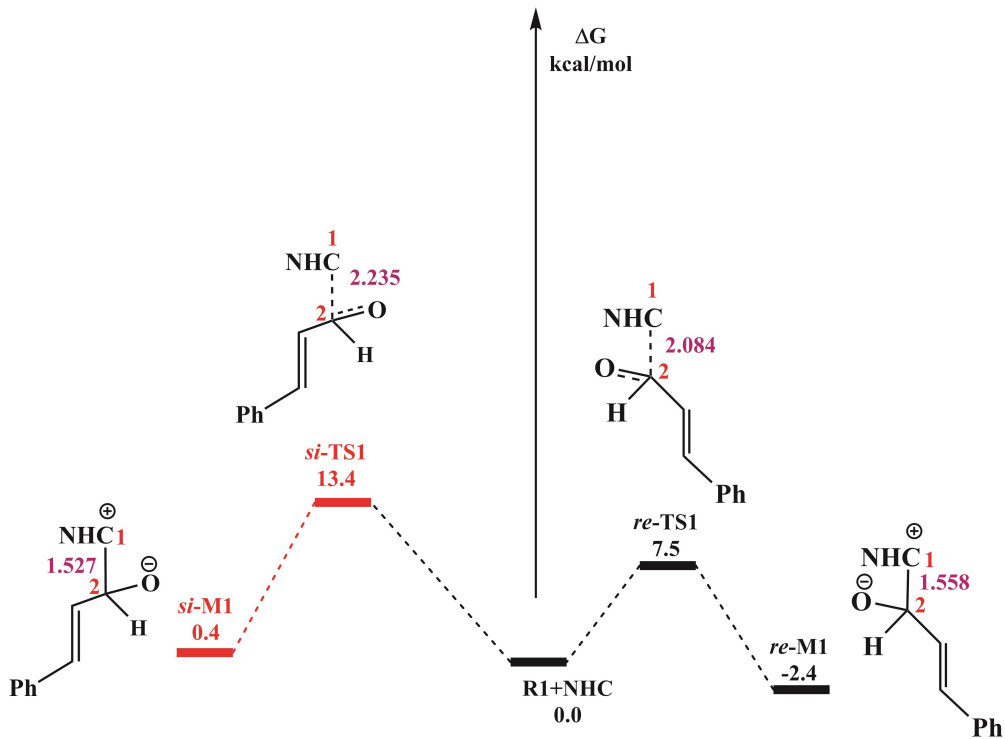

Supplement: d1nj01617b3.pdf [file d1nj01617b3.pdf]

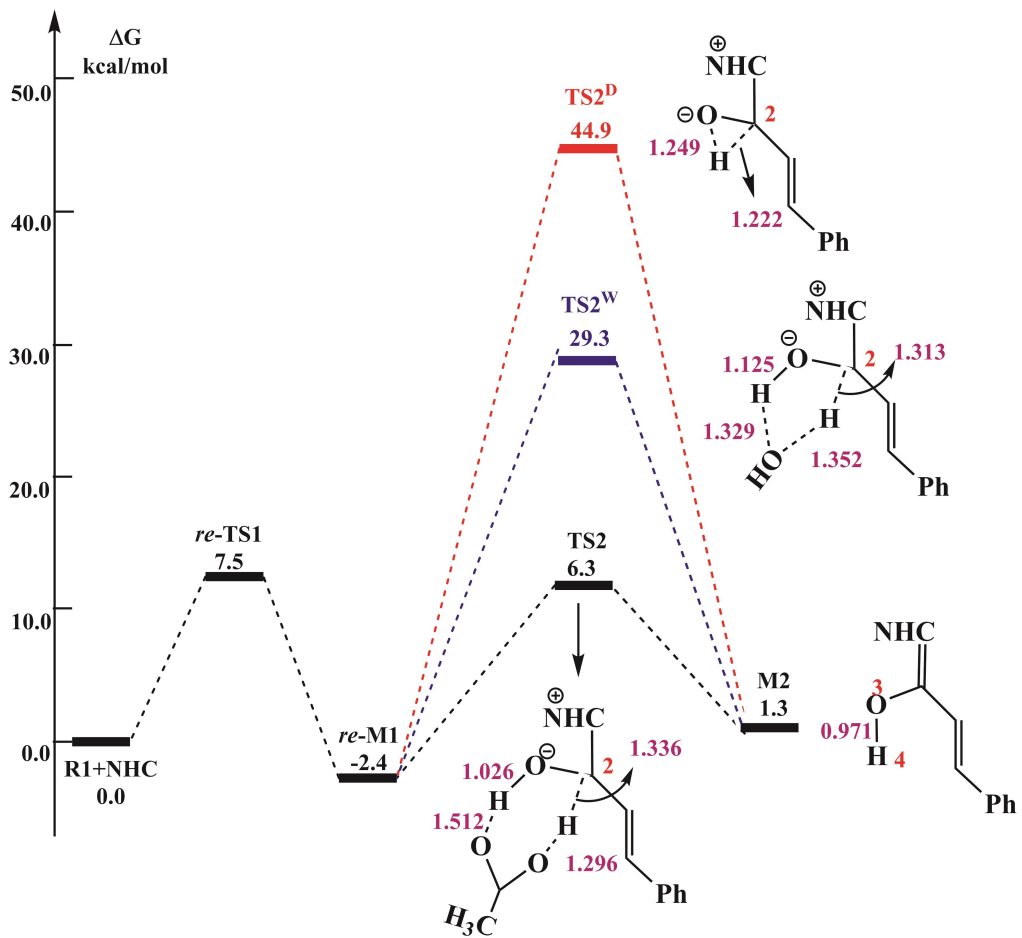

Supplement: d1nj01617b4.pdf [file d1nj01617b4.pdf]

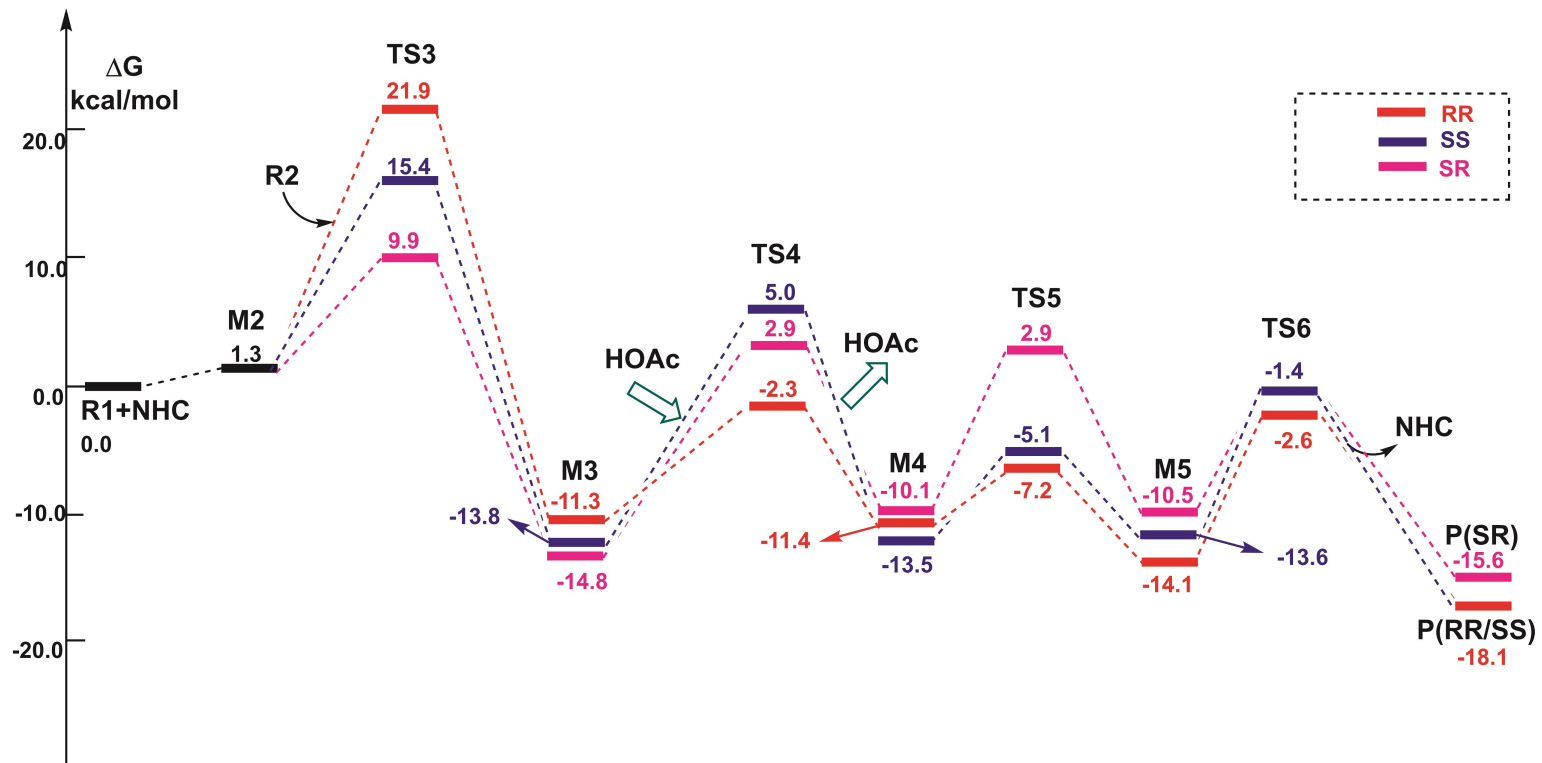

Supplement: d1nj01617b5.pdf [file d1nj01617b5.pdf]

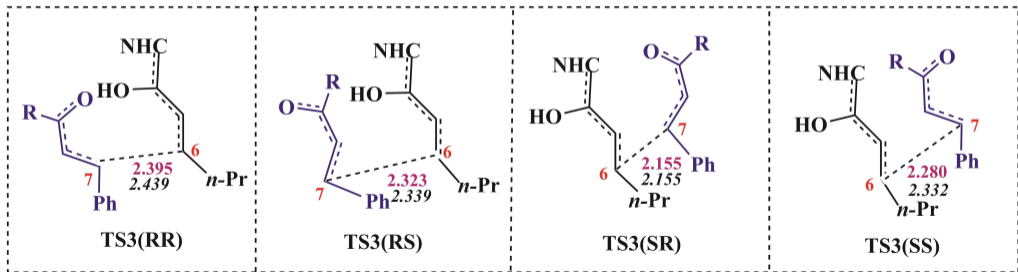

Supplement: d1nj01617b6.pdf [file d1nj01617b6.pdf]
